# Supplementary material for: Sustainable photocatalytic synthesis of 2-hydroxybenzofuran-3(2H)-ones using lead-free Cs2AgBiBr6 nanocrystals
Source: Royal Society of Chemistry journal article supplement (doi:10.1039/d4gc03834g), 2024-01-01

## Supporting Information

### Sustainable photocatalytic synthesis of 2-hydroxybenzofuran-3(2H)-ones by lead-free Cs<sub>2</sub>AgBiBr<sub>6</sub> nanocrystals

Haibo Zhu,<sup>a,‡</sup> Ting Zhong,<sup>a,‡</sup> Liu Yang,<sup>a</sup> Yajing Shen,<sup>b,\*</sup> Qiangwen Fan,<sup>a,\*</sup> Zhanggao Le,<sup>a</sup> Zongbo Xie,<sup>a,\*</sup>

<sup>a</sup>Jiangxi Province Key Laboratory of Functional Organic Polymers, East China University of Technology, Nanchang 330013, China.

<sup>b</sup>Institute of Zhejiang University-Quzhou, Quzhou 324000, China.

<sup>‡</sup>These authors contributed equally to this work.

E-mail: shenyj0356@163.com, fanqw2019@ecut.edu.cn, zbxie@ecut.edu.cn

|                                                                                            |    |
|--------------------------------------------------------------------------------------------|----|
| 1. General information.....                                                                | 2  |
| 2. Preparation of Cs <sub>2</sub> AgBiBr <sub>6</sub> NCs .....                            | 2  |
| 3. Preparation of Cs <sub>2</sub> AgBiBr <sub>6</sub> MCs .....                            | 3  |
| 4. Characterization of Cs <sub>2</sub> AgBiBr <sub>6</sub> .....                           | 3  |
| 5. General Procedure for the reactions .....                                               | 5  |
| 6. General Procedure for the recycle experiments .....                                     | 7  |
| 7. Inactive substrates.....                                                                | 8  |
| 8. HRMS spectrums of the intermediates .....                                               | 8  |
| 9. DFT calculations data .....                                                             | 8  |
| 10. Data for the products. ....                                                            | 18 |
| 11. <sup>1</sup> H NMR, <sup>13</sup> C NMR and <sup>19</sup> F NMR for the products. .... | 33 |

#### 1. General information

All commercial reagents were used directly without further purification, unless otherwise stated. Unless otherwise specified, all reactions were carried out in a 10 mL quartz glass tube under air and then monitored by TLC. Products were purified by column chromatography on silica gel using petroleum ether and ethyl acetate as the eluent. DMSO-d<sub>6</sub> and CDCl<sub>3</sub> were purchased from Shanghai aladdin Biochemical Technology Co., Ltd. Chemical shifts for <sup>1</sup>H and <sup>13</sup>C NMR were referred to internal

Me<sub>4</sub>Si (0 ppm) as the standard. The following abbreviations were used to describe NMR signals: s = singlet, d = doublet, t = triplet, m = multiplet, dd = doublet of doublets, q = quartet.

**Characterization.** Transmission electron microscopy (TEM) images were obtained on a JEM F200 microscopy with an accelerating voltage of 200 kV. The energy dispersive X-ray (EDX) composition analysis was carried out using an accessory attached on TEM. Powder X-ray diffraction (XRD) patterns were collected on a Rigaku SmartLab diffractometer using a Cu K $\alpha$  radiation at a scan rate of 10° min<sup>-1</sup>. UV-vis diffuse reflectance spectra (DRS) of the samples were obtained on a Lambda 1050 spectrometer (TU-1901, CN). Electron paramagnetic resonance (EPR) spin-trapping measurements were carried out on a Bruker EMX PLUS EPR spectrometer at X-band frequency (9.4 GHz) and at room temperature. The EPR signals of •O<sub>2</sub><sup>-</sup> free radicals and <sup>1</sup>O<sub>2</sub> were detected in the presence of 5,5-dimethyl-1-pyrroline N-oxide (DMPO) and 2,2,6,6-Tetramethylpiperidinoxy (TEMPO) under the illumination of 300 W Xe lamp with an optical cutoff filter ( $\lambda \geq 420$  nm). <sup>1</sup>H NMR spectra were recorded at 500 MHz and <sup>13</sup>C NMR spectra were recorded at 126 MHz using a Bruker Avance 400 spectrometer at ambient temperature (25 °C) with TMS as an internal standard.

## 2. Preparation of Cs<sub>2</sub>AgBiBr<sub>6</sub> NCs

Cs<sub>2</sub>CO<sub>3</sub> (203.5 mg), ODE (10 mL) and OA (0.625 mL) were put into a three-neck round-bottom (RB) flask with the capacity of 100 mL, kept in vacuum for 1 h at 120 °C, and then under N<sub>2</sub> environment was heated to 150 °C until the formation of Cs-oleate (clear solution). BiBr<sub>3</sub> (90 mg), AgNO<sub>3</sub> (34 mg), OA (2 mL), OLA (2 mL), ODE (8 mL) and HBr (0.2 mL) were put into a three-neck round-bottom flask with the capacity of 100 mL, and the reactant mixture heated to 120 °C for at least 1 h under vacuum to remove residual gases and water in solvents. After complete dissolution of the AgNO<sub>3</sub> and BiBr<sub>3</sub> salt, the reaction mixture was further heated to 200 °C under N<sub>2</sub> atmosphere and 1.6 mL preheated Cs-oleate was added rapidly into the flask under vigorous stirring. After 5 s, the mixture was cooled down to room temperature by putting the flask into the ice-water bath. Centrifuging the crude solution for 5 min at

7000 rpm to separate crude NCs from the solution. After centrifugation, the crude product was redispersed in dichloromethane and centrifuged again for 5 min at 8000 rpm, repeat it again, and then the precipitates were obtained and the upper solution were discarded. Drying at 70 °C for 30 min to obtain Cs<sub>2</sub>AgBiBr<sub>6</sub> NCs.

### **3. Preparation of Cs<sub>2</sub>AgBiBr<sub>6</sub> MCs**

2.130 g CsBr (10.0 mmol), 0.940 g AgBr (5.0 mmol) and 2.245 g BiBr<sub>3</sub> (5.0 mmol) were added into a 100 mL round bottom flask with 50 mL of 48 % HBr. The mixture was heated to 110 °C for 2 h, then cooled to room temperature. An orange powder precipitated from solution, centrifuged at 8000 rpm for 5 min and dried at 70 °C under reduced pressure for 4 h to obtain the Cs<sub>2</sub>AgBiBr<sub>6</sub> product. The Cs<sub>2</sub>AgBiBr<sub>6</sub> product was dissolved in DMSO giving 50 mM the transparent solution. 1 mL Cs<sub>2</sub>AgBiBr<sub>6</sub> transparent solution was added into 10 mL DCM, then precipitated, centrifuged at 8000 rpm for 5 min and dried at 70 °C under reduced pressure overnight to obtain the Cs<sub>2</sub>AgBiBr<sub>6</sub> MCs.

### **4. Characterization of Cs<sub>2</sub>AgBiBr<sub>6</sub>**

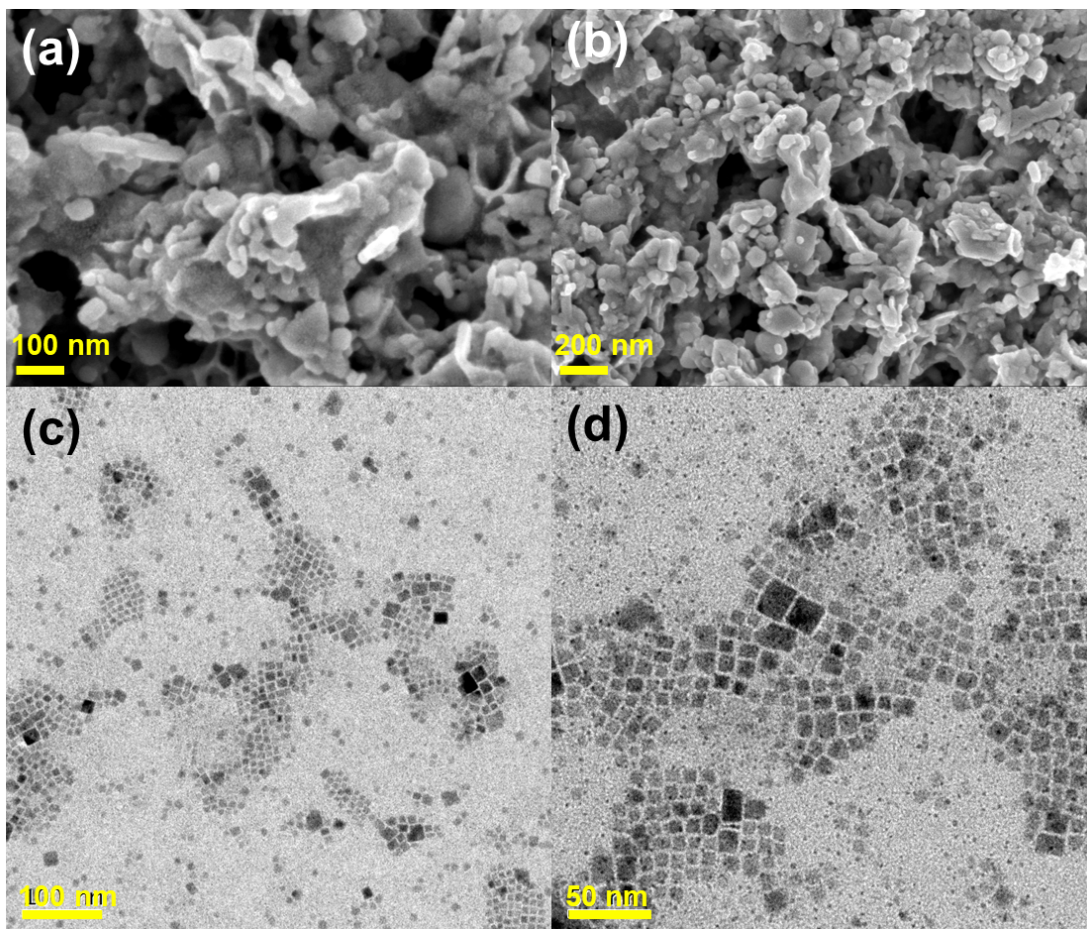

**Figure S1** (a, b) SEM image of Cs<sub>2</sub>AgBiBr<sub>6</sub> NCs. (c, d) TEM image of Cs<sub>2</sub>AgBiBr<sub>6</sub> NCs.

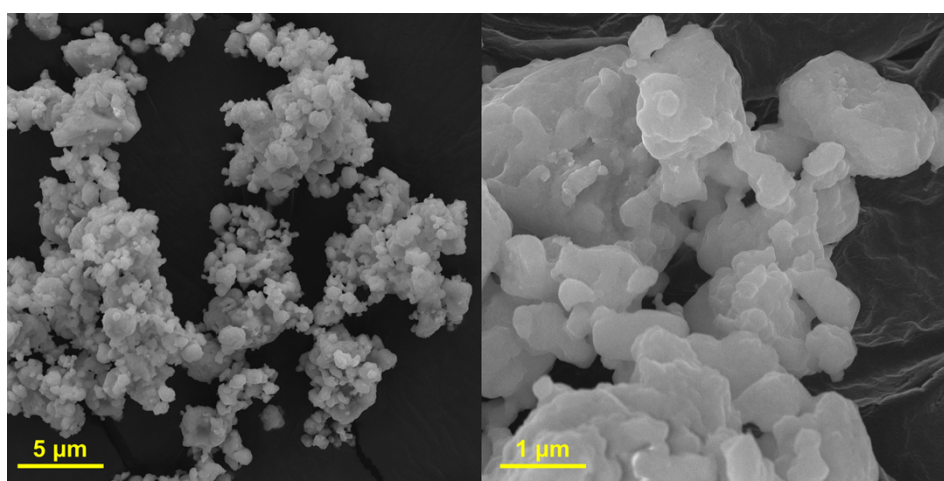

**Figure S2** SEM image of Cs<sub>2</sub>AgBiBr<sub>6</sub> MCs.

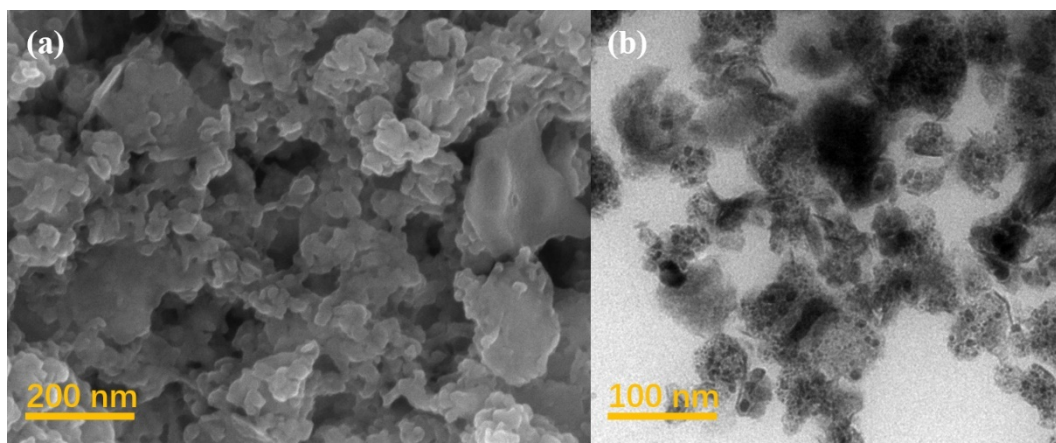

**Figure S3** SEM image (a) and TEM image (b) of recycled  $\text{Cs}_2\text{AgBiBr}_6$  NCs.

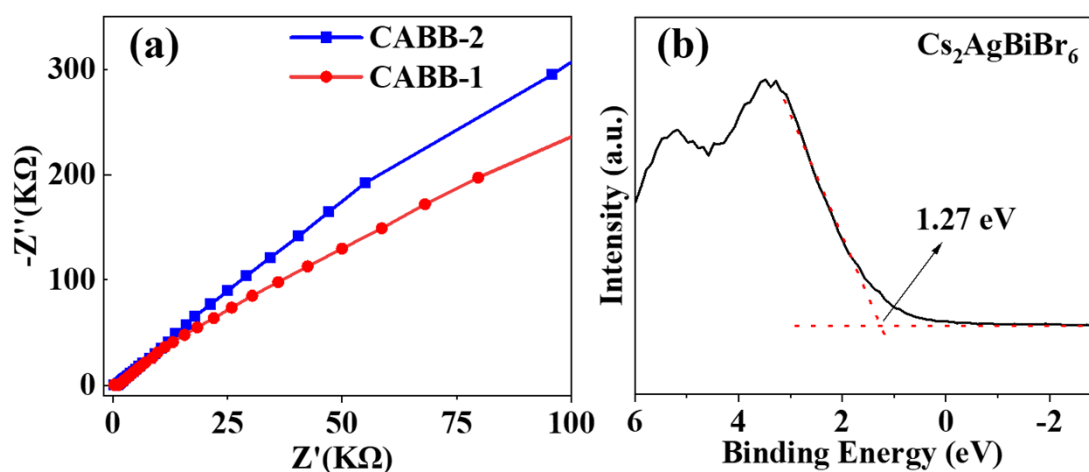

**Figure S4** (a) Electrochemical impedance spectroscopy. (b) XPS valence spectra of  $\text{Cs}_2\text{AgBiBr}_6$  NCs.

## 5. General Procedure for the reactions

A 10 mL quartz glass tube was charged with 4-hydroxycoumarins (**1**; 0.2 mmol), CABB (10 mol %), alcohol substrates (**2**; 2.0 ml) or amines (**4**; 0.3 mmol) dissolved in 2 mL of MeCN, and a magnetic stir bar in a sequential manner. and the resulting reaction mixture was stirred under irradiation of a 50 W 457 nm blue LED and an irradiation distance of about 5 cm under air atmosphere at room temperature. After total conversion of the 4-hydroxycoumarins (detected by TLC), the isolated photocatalyst was centrifuged, and the resulting mixture was purified by flash silica gel chromatography (EtOAc / PE = 1/4) to afford the desired products.

**Table S1** Comparison between  $\text{Cs}_2\text{AgBiBr}_6$  NCs and other photocatalysts<sup>a</sup>

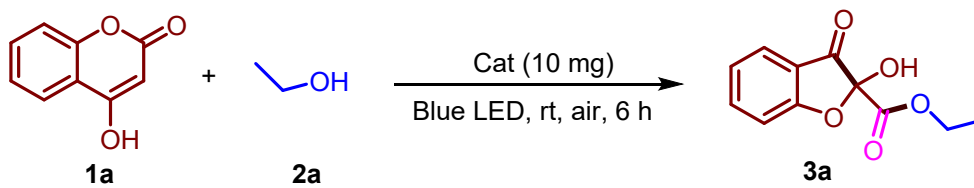

| Entry    | Photocatalyst                                           | Yield (%) <sup>b</sup> |
|----------|---------------------------------------------------------|------------------------|
| <b>1</b> | <b>Cs<sub>2</sub>AgBiBr<sub>6</sub></b>                 | <b>82</b>              |
| 2        | Eosin Y                                                 | 63                     |
| 3        | Eosin B                                                 | 53                     |
| 4        | Rose Bengal                                             | 61                     |
| 5        | Rhodamine B                                             | 35                     |
| 6        | CBr <sub>4</sub>                                        | Trace                  |
| 7        | Ru(bpy) <sub>3</sub> Cl <sub>2</sub> ·6H <sub>2</sub> O | 10                     |

<sup>a</sup> Reaction conditions: 4-Hydroxycoumarin (**1a**, 0.2 mmol) and photocatalyst (10 mg) in 2.0 mL of ethanol, 457 nm Blue LED (50 W), under air atmosphere, rt, 6 h. <sup>b</sup> Isolated yields.

**Table S2** Optimization of reaction conditions<sup>a</sup>

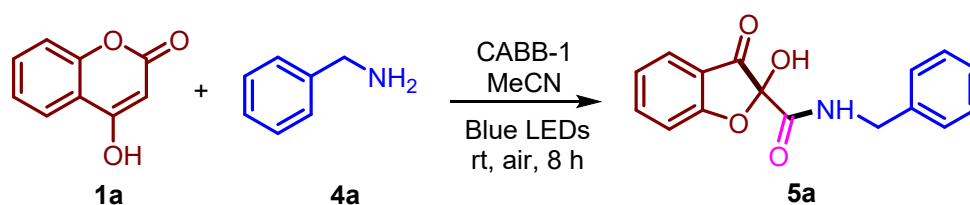

| Entry    | Variation from the standard   | Yield (%) <sup>b</sup> |
|----------|-------------------------------|------------------------|
| <b>1</b> | <b>none</b>                   | <b>70</b>              |
| 2        | DCE                           | 46                     |
| 3        | EtOAc                         | 65                     |
| 4        | THF                           | 20                     |
| 5        | 1,4-dioxane                   | 60                     |
| 6        | <b>4a</b> (2 equiv.) was used | 68                     |

|    |                               |    |
|----|-------------------------------|----|
| 7  | <b>4a</b> (1 equiv.) was used | 55 |
| 8  | Reaction time: 7 h            | 65 |
| 9  | Reaction time: 9 h            | 69 |
| 10 | CABB-1 (10 mg)                | 60 |
| 11 | CABB-1 (20 mg)                | 71 |

<sup>a</sup> Standard reaction conditions: 4-Hydroxycoumarin (**1a**, 0.2 mmol), amines (**4a**, 0.3 mmol), MeCN (2.0 mL), CABB-1 (15 mg), 50 W 457 nm Blue LED, rt, air, 8 h, <sup>b</sup> Isolated yield.

**Table S3** Free radical verification experiments<sup>a</sup>

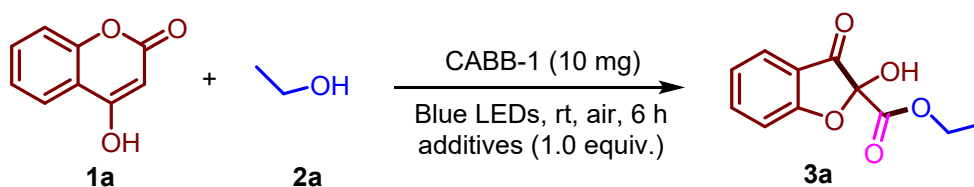

| Entry | Scavenger | Inhibited species                                            | Yield (%) <sup>b</sup> |
|-------|-----------|--------------------------------------------------------------|------------------------|
| 1     | none      | /                                                            | 82                     |
| 2     | TEMPO     | <sup>1</sup> O <sub>2</sub> and ·O <sub>2</sub> <sup>-</sup> | 14                     |
| 3     | DABCO     | <sup>1</sup> O <sub>2</sub>                                  | NR                     |
| 4     | BQ        | O <sub>2</sub> <sup>·-</sup>                                 | trace                  |

<sup>a</sup> Reaction conditions: 4-Hydroxycoumarin (**1a**, 0.2 mmol) and CABB-1 (10 mg) in 2.0 mL of ethanol, 457 nm Blue LED (50 W), under air atmosphere, rt, 6 h. <sup>b</sup> Isolated yields.

## 6. General Procedure for the recycle experiments

0.2 mmol 4-hydroxycoumarins, 10 mg CABB, and 2.0 ml ethanol were added to a 10 ml glass tube and irradiated with a 50 W 457 nm blue LED in air at room temperature for 6 h. Upon completion of the reaction, the catalyst was collected by centrifuging the reaction solution, combined supernatant was purified by flash silica gel chromatography (EtOAc/PE = 1/3) to afford the desired products. The catalyst was dried under vacuum and was charged again with fresh reagents, repeating the process.

## 7. Inactive substrates

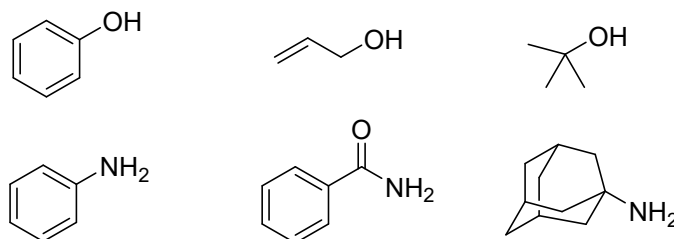

## 8. HRMS spectrums of the intermediates

HRMS (ESI)  $m/z$ : calcd for  $C_{16}H_{16}O$   $[M + H]^+$ : 225.1279, found: 225.1277.

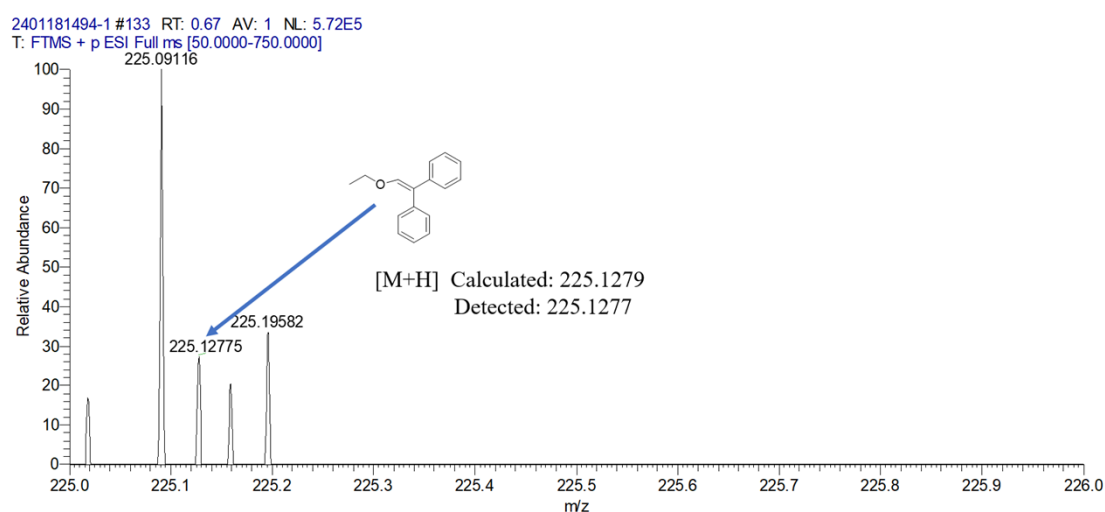

Figure S5. HRMS spectrums of free radical addition products

## 9. DFT calculations data

The transformation was initiated with **B** and singlet oxygen, leading to the formation of **C** via **TS1**, then undergoes a hydrogen transfer process, generate **D** through the **TS2** process, then loses one hydroxyl radical to generate **E**. The intermediate **4** then undergo radical addition, through a **TS4** process to produce **F**. Finally, after the  $\alpha$ -ketol rearrangement reaction, the product **3** is produced after the **TS5** process.



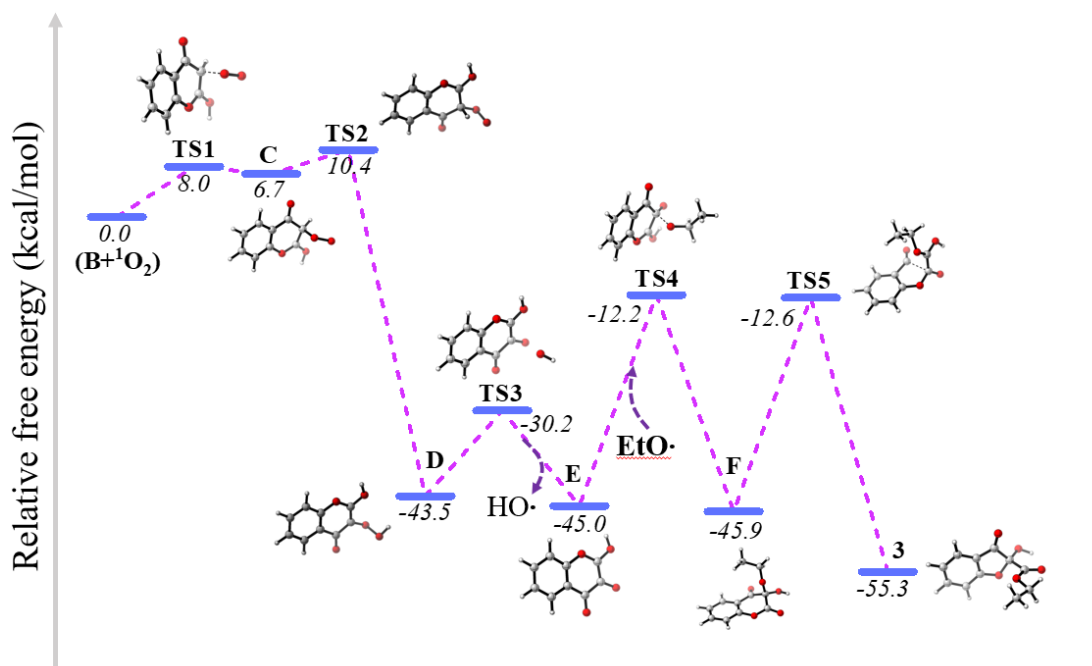

Figure S6. Gibbs energy profiles for model reaction of **1a** and ethanol

### Cartesian coordination of **1**

\*\*\*\*\*

#p opt freq b3lyp scrf=(solvent=ethanol) em=gd3bj tzvp

|   |           |           |           |
|---|-----------|-----------|-----------|
| C | -3.023406 | -1.154509 | 0.322729  |
| C | -1.795495 | -1.675564 | -0.058421 |
| C | -0.750986 | -0.807817 | -0.342054 |
| C | -0.920426 | 0.580979  | -0.252877 |
| C | -2.172156 | 1.082653  | 0.130562  |
| C | -3.216193 | 0.226142  | 0.421514  |
| H | -3.837803 | -1.830486 | 0.548163  |
| H | -1.635661 | -2.741494 | -0.143360 |
| C | 0.182422  | 1.491116  | -0.576786 |
| H | -2.293168 | 2.155392  | 0.197817  |
| H | -4.176698 | 0.619973  | 0.724277  |
| C | 1.568879  | 0.796354  | -0.631642 |
| C | 1.599433  | -0.600211 | -0.630905 |

|   |          |           |           |
|---|----------|-----------|-----------|
| H | 2.462060 | 1.295584  | -0.997730 |
| O | 0.060847 | 2.691168  | -0.739800 |
| O | 0.421906 | -1.378015 | -0.790923 |
| O | 2.817444 | -1.126374 | -0.918372 |
| H | 2.753391 | -2.093319 | -0.953028 |
| O | 1.956272 | -0.538152 | 1.812374  |
| O | 1.980462 | 0.721310  | 1.928114  |

\*\*\*\*\*

### Cartesian coordination of TS1

#p opt(ts,calcfc,noeigen) freq b3lyp scrf=(solvent=ethanol) em=gd3bj tzvp

|   |           |           |           |
|---|-----------|-----------|-----------|
| C | -3.283484 | -0.865537 | 0.518657  |
| C | -2.087881 | -1.541667 | 0.306443  |
| C | -0.977475 | -0.802912 | -0.048531 |
| C | -1.008275 | 0.582684  | -0.203265 |
| C | -2.227297 | 1.237424  | 0.009147  |
| C | -3.354834 | 0.520654  | 0.369447  |
| H | -4.164674 | -1.426095 | 0.799905  |
| H | -2.013826 | -2.615075 | 0.408571  |
| C | 0.208471  | 1.318485  | -0.566025 |
| H | -2.259134 | 2.312000  | -0.107370 |
| H | -4.291524 | 1.033773  | 0.537979  |
| C | 1.501530  | 0.518183  | -0.526732 |
| C | 1.300822  | -0.935347 | -0.622944 |
| H | 2.244248  | 0.905032  | -1.220077 |
| O | 0.239954  | 2.505203  | -0.820681 |
| O | 0.197066  | -1.537029 | -0.273599 |
| O | 2.322924  | -1.682697 | -0.860172 |
| O | 2.171140  | 0.619040  | 1.265400  |
| O | 3.558064  | 0.373426  | 1.294242  |
| H | 2.142256  | -2.624975 | -0.677707 |

\*\*\*\*\*

## Cartesian coordination of 2

#p opt freq b3lyp scrf=(solvent=ethanol) em=gd3bj tzvp

|   |           |           |           |
|---|-----------|-----------|-----------|
| C | -3.237064 | -0.952281 | 0.351230  |
| C | -2.017519 | -1.590310 | 0.169224  |
| C | -0.903639 | -0.810719 | -0.081489 |
| C | -0.960643 | 0.580781  | -0.162118 |
| C | -2.204262 | 1.197767  | 0.019059  |
| C | -3.332079 | 0.439645  | 0.276606  |
| H | -4.119542 | -1.544986 | 0.551072  |
| H | -1.923945 | -2.666108 | 0.216682  |
| C | 0.256851  | 1.357861  | -0.434363 |
| H | -2.254272 | 2.276268  | -0.041661 |
| H | -4.288299 | 0.923139  | 0.422269  |
| C | 1.518455  | 0.577124  | -0.396016 |
| C | 1.406287  | -0.833957 | -0.499380 |
| H | 2.379909  | 1.037193  | -0.858562 |
| O | 0.268010  | 2.564394  | -0.619766 |
| O | 0.296299  | -1.499795 | -0.275610 |
| O | 2.477188  | -1.543373 | -0.686864 |
| O | 1.877930  | 0.538652  | 0.997036  |
| O | 3.172791  | 0.274300  | 1.186400  |
| H | 2.310091  | -2.494403 | -0.555874 |

\*\*\*\*\*

## Cartesian coordination of TS2

#p opt=(calcfc,ts,noeigen) freq b3lyp scrf=(solvent=ethanol) em=gd3bj tzvp

|   |          |           |           |
|---|----------|-----------|-----------|
| C | 3.473672 | -0.801985 | 0.054290  |
| C | 2.274415 | -1.503927 | 0.028149  |
| C | 1.098894 | -0.781493 | -0.004024 |
| C | 1.067486 | 0.612700  | -0.009161 |
| C | 2.289732 | 1.294435  | 0.025325  |
| C | 3.482823 | 0.594014  | 0.054229  |

|   |           |           |           |
|---|-----------|-----------|-----------|
| H | 4.406010  | -1.349745 | 0.077224  |
| H | 2.245683  | -2.584313 | 0.036205  |
| C | -0.212588 | 1.328297  | -0.061224 |
| H | 2.273925  | 2.375652  | 0.020026  |
| H | 4.423221  | 1.127235  | 0.074432  |
| C | -1.432273 | 0.426146  | -0.329408 |
| C | -1.260396 | -0.953412 | -0.024545 |
| H | -2.162014 | 0.526967  | 0.923389  |
| O | -0.327323 | 2.533068  | 0.036268  |
| O | -0.082508 | -1.538647 | -0.005667 |
| O | -2.356561 | -1.758812 | 0.029233  |
| O | -2.810558 | 0.409998  | -0.634312 |
| O | -3.642655 | 0.519628  | 0.631528  |
| H | -2.120583 | -2.706328 | 0.010544  |

\*\*\*\*\*

### Cartesian coordination of 3

#p opt freq b3lyp scrf=(solvent=ethanol) em=gd3bj tzvp

|   |           |           |           |
|---|-----------|-----------|-----------|
| C | -3.270867 | -0.940115 | 0.380153  |
| C | -2.049159 | -1.581298 | 0.213000  |
| C | -0.940125 | -0.806253 | -0.059292 |
| C | -0.997180 | 0.582379  | -0.174331 |
| C | -2.241759 | 1.201642  | -0.008878 |
| C | -3.368697 | 0.447996  | 0.268467  |
| H | -4.151553 | -1.529498 | 0.596580  |
| H | -1.953925 | -2.655337 | 0.287120  |
| C | 0.218487  | 1.357226  | -0.448457 |
| H | -2.294092 | 2.278278  | -0.095031 |
| H | -4.325542 | 0.933692  | 0.401230  |
| C | 1.522147  | 0.540300  | -0.367652 |
| C | 1.373258  | -0.821511 | -0.508036 |
| O | 0.234025  | 2.551719  | -0.665460 |

|   |          |           |           |
|---|----------|-----------|-----------|
| O | 0.262669 | -1.505437 | -0.242109 |
| O | 2.469551 | -1.567483 | -0.720282 |
| O | 1.942544 | 0.585747  | 0.979232  |
| O | 3.260712 | 0.382391  | 1.070784  |
| H | 2.303141 | -2.518929 | -0.575778 |
| H | 3.589319 | 0.034115  | 0.238725  |

\*\*\*\*\*

### Cartesian coordination of TS3

#p opt=(calcfc,ts,noeigen) freq b3lyp scrf=(solvent=ethanol) em=gd3bj tzvp

|   |           |           |           |
|---|-----------|-----------|-----------|
| C | -3.544552 | 0.488607  | 0.203763  |
| C | -2.435708 | 1.346843  | 0.166019  |
| C | -1.184926 | 0.758227  | 0.032254  |
| C | -0.959773 | -0.621430 | -0.068691 |
| C | -2.098334 | -1.453208 | -0.021774 |
| C | -3.372730 | -0.897755 | 0.111580  |
| H | -4.549629 | 0.913385  | 0.306054  |
| H | -2.547381 | 2.432013  | 0.239147  |
| C | 0.375629  | -1.213281 | -0.210125 |
| H | -1.968294 | -2.539775 | -0.092969 |
| H | -4.247988 | -1.554566 | 0.144674  |
| C | 1.548693  | -0.226372 | -0.405583 |
| C | 1.132296  | 1.265460  | -0.166388 |
| O | 0.629074  | -2.390964 | -0.199820 |
| O | -0.113177 | 1.702586  | 0.019923  |
| O | 2.035032  | 2.183343  | -0.151954 |
| O | 2.762151  | -0.499161 | -0.702967 |
| O | 3.534440  | -0.710846 | 1.128634  |
| H | 1.654431  | 3.162528  | -0.074731 |
| H | 4.115126  | -1.375807 | 0.880973  |

\*\*\*\*\*

### Cartesian coordination of 4

```
#p opt freq b3lyp scrf=(solvent=ethanol) em=gd3bj tzvp
C          3.084617   -0.869403    0.014835
C          1.869999   -1.544316    0.006424
C          0.711295   -0.793492   -0.005250
C          0.705276    0.598819   -0.012938
C          1.942223    1.252182   -0.002419
C          3.121045    0.525746    0.010092
H          4.005505   -1.436424    0.024884
H          1.816326   -2.623781    0.010665
C         -0.563874    1.349506   -0.014389
H          1.948942    2.333458   -0.005561
H          4.072291    1.039962    0.016725
C         -1.809793    0.515470   -0.030258
C         -1.643481   -0.930746   -0.004126
O         -0.626534    2.565912   -0.011253
O         -0.486857   -1.525410   -0.014185
O         -2.683552   -1.694626   -0.006000
O         -2.941510    0.991910    0.051991
H         -2.439284   -2.638103    0.017028
```

\*\*\*\*\*

#### Cartesian coordination of TS4

```
#p opt(calcfc,ts,noeigen) freq rb3lyp scrf=(solvent=ethanol) em=gd3bj tzvp
C         -3.562188   -0.889363    0.668393
C         -2.432303   -1.556962    0.213666
C         -1.327290   -0.817721   -0.174817
C         -1.337625    0.579759   -0.120070
C         -2.493282    1.234054    0.324291
C         -3.599106    0.505809    0.721951
H         -4.425027   -1.463803    0.978721
H         -2.400678   -2.635621    0.149216
C         -0.165788    1.326953   -0.508481
```

|   |           |           |           |
|---|-----------|-----------|-----------|
| H | -2.490276 | 2.315068  | 0.362577  |
| H | -4.486461 | 1.011874  | 1.076267  |
| C | 1.150956  | 0.464647  | -0.552944 |
| C | 0.910788  | -0.887335 | -1.066381 |
| O | -0.090361 | 2.517468  | -0.737138 |
| O | -0.258319 | -1.543466 | -0.677304 |
| O | 1.779030  | -1.595839 | -1.806354 |
| O | 2.102350  | 1.061525  | -1.314010 |
| O | 1.482836  | 0.365465  | 0.810856  |
| C | 2.668712  | -0.404870 | 1.126666  |
| C | 2.989343  | -0.161892 | 2.582958  |
| H | 3.484425  | -0.082938 | 0.478233  |
| H | 2.470193  | -1.464473 | 0.941973  |
| H | 3.871444  | -0.740151 | 2.863449  |
| H | 3.196803  | 0.893624  | 2.763149  |
| H | 2.159306  | -0.470434 | 3.220052  |
| H | 1.682682  | -0.162858 | -2.333422 |

\*\*\*\*\*

### Cartesian coordination of 5

#p opt freq rb3lyp scrf=(solvent=ethanol) em=gd3bj tzvp

|   |           |           |           |
|---|-----------|-----------|-----------|
| C | 3.698943  | 0.299132  | 0.683969  |
| C | 2.647733  | 1.207741  | 0.619031  |
| C | 1.438840  | 0.777754  | 0.113682  |
| C | 1.229598  | -0.527176 | -0.338213 |
| C | 2.305714  | -1.415753 | -0.268452 |
| C | 3.529625  | -1.010794 | 0.240295  |
| H | 4.652370  | 0.620394  | 1.081000  |
| H | 2.759489  | 2.230791  | 0.949574  |
| C | -0.081128 | -0.967265 | -0.869971 |
| H | 2.151996  | -2.428599 | -0.615170 |
| H | 4.351742  | -1.711191 | 0.294333  |

|   |           |           |           |
|---|-----------|-----------|-----------|
| C | -1.205030 | 0.042667  | -0.687251 |
| C | -0.745783 | 1.426918  | -0.346616 |
| O | -0.272391 | -2.045464 | -1.388242 |
| O | 0.433167  | 1.769866  | 0.050356  |
| O | -1.605939 | 2.360998  | -0.505042 |
| O | -2.292530 | 0.007970  | -1.317396 |
| O | -1.284851 | -0.066494 | 0.690327  |
| C | -2.629065 | -0.180427 | 1.129711  |
| C | -2.908306 | -1.587461 | 1.636732  |
| H | -3.307608 | 0.050759  | 0.299699  |
| H | -2.790891 | 0.563770  | 1.915540  |
| H | -3.934418 | -1.656743 | 2.006626  |
| H | -2.781885 | -2.314266 | 0.832501  |
| H | -2.230311 | -1.849239 | 2.450917  |
| H | -2.376971 | 1.887311  | -0.932541 |

\*\*\*\*\*

### Cartesian coordination of TS5

#p opt=(calcfc,ts,noeigen) freq rb3lyp scrf=(solvent=ethanol) em=gd3bj tzvp

|   |           |           |           |
|---|-----------|-----------|-----------|
| C | 3.456324  | 0.936543  | -0.594992 |
| C | 2.455156  | 0.404421  | -1.395540 |
| C | 1.369822  | -0.201024 | -0.775663 |
| C | 1.283631  | -0.252259 | 0.622426  |
| C | 2.312867  | 0.273428  | 1.416672  |
| C | 3.395878  | 0.873205  | 0.804491  |
| H | 4.306440  | 1.411704  | -1.067490 |
| H | 2.510193  | 0.446947  | -2.474422 |
| C | 0.070197  | -0.842915 | 1.089465  |
| H | 2.233950  | 0.214069  | 2.494364  |
| H | 4.193535  | 1.297522  | 1.398625  |
| C | -1.658265 | -0.492292 | -0.292501 |
| C | -0.664117 | -1.399740 | -0.755077 |



|   |           |           |           |
|---|-----------|-----------|-----------|
| O | -0.348556 | -1.184196 | 2.148208  |
| O | 0.375631  | -0.772389 | -1.512496 |
| O | -0.835715 | -2.626860 | -0.812943 |
| O | -2.710561 | -1.000681 | 0.301769  |
| O | -1.599142 | 0.798253  | -0.478514 |
| C | -2.280338 | 1.708690  | 0.461404  |
| C | -2.562592 | 2.975849  | -0.304094 |
| H | -1.594577 | 1.858454  | 1.295496  |
| H | -3.193073 | 1.237100  | 0.813642  |
| H | -3.036452 | 3.700849  | 0.358898  |
| H | -1.644634 | 3.414537  | -0.695575 |
| H | -3.240021 | 2.772125  | -1.135191 |
| H | -2.659999 | -1.969761 | 0.183916  |

\*\*\*\*\*

### Cartesian coordination of 6

#p opt freq rb3lyp scrf=(solvent=ethanol) em=gd3bj tzvp

|   |           |           |           |
|---|-----------|-----------|-----------|
| C | 3.453157  | 0.817256  | -0.448345 |
| C | 2.542867  | 0.221532  | -1.310007 |
| C | 1.381105  | -0.313268 | -0.767905 |
| C | 1.137143  | -0.245437 | 0.608275  |
| C | 2.074130  | 0.343717  | 1.468459  |
| C | 3.229349  | 0.881338  | 0.934748  |
| H | 4.361809  | 1.239808  | -0.857649 |
| H | 2.723470  | 0.163605  | -2.374326 |
| C | -0.126807 | -0.820290 | 0.983370  |
| H | 1.871676  | 0.380619  | 2.530770  |
| H | 3.959652  | 1.353665  | 1.577322  |
| C | -1.618944 | -0.463457 | -0.311531 |
| C | -0.562472 | -1.396069 | -0.558883 |
| O | -0.653238 | -1.096179 | 2.014251  |
| O | 0.467448  | -0.939210 | -1.555825 |

|   |           |           |           |
|---|-----------|-----------|-----------|
| O | -0.734916 | -2.631431 | -0.549250 |
| O | -2.722023 | -0.926078 | 0.242566  |
| O | -1.538734 | 0.808041  | -0.598005 |
| C | -2.411470 | 1.749435  | 0.122614  |
| C | -1.998872 | 3.136714  | -0.294872 |
| H | -2.271641 | 1.580118  | 1.190315  |
| H | -3.441685 | 1.523706  | -0.146238 |
| H | -2.631592 | 3.863831  | 0.216248  |
| H | -0.960676 | 3.332682  | -0.026172 |
| H | -2.120143 | 3.272087  | -1.369897 |
| H | -2.634283 | -1.900108 | 0.274192  |

\*\*\*\*\*

## 10. Data for the products.

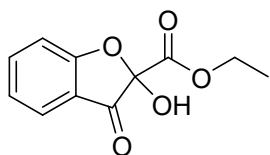

### ethyl 2-hydroxy-3-oxo-2,3-dihydrobenzofuran-2-carboxylate

**3a:** Flash column chromatography (petroleum/ethyl acetate 4:1) afforded the product as a faint yellow solid;  $^1\text{H}$  NMR (500 MHz,  $\text{CDCl}_3$ )  $\delta$  7.77 – 7.60 (m, 2H), 7.21 – 7.07 (m, 2H), 5.35 (s, 1H), 4.36 – 4.24 (m, 2H), 1.24 (t,  $J = 7.1$  Hz, 3H);  $^{13}\text{C}$  NMR (126 MHz,  $\text{CDCl}_3$ )  $\delta$  193.86, 171.43, 166.88, 139.17, 125.37, 123.11, 118.87, 113.50, 97.66, 64.06, 13.85.

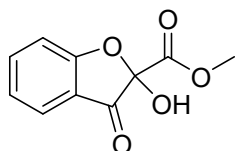

### methyl 2-hydroxy-3-oxo-2,3-dihydrobenzofuran-2-carboxylate

**3b:** Flash column chromatography (petroleum/ethyl acetate 4:1) afforded the product as a white solid;  $^1\text{H}$  NMR (500 MHz,  $\text{CDCl}_3$ )  $\delta$  7.70 (dd,  $J = 14.2, 7.7$  Hz, 2H), 7.20 –

7.11 (m, 2H), 3.84 (s, 3H);  $^{13}\text{C}$  NMR (126 MHz,  $\text{CDCl}_3$ )  $\delta$  193.65, 171.36, 167.40, 139.27, 125.42, 123.22, 118.81, 113.55, 97.59, 54.35.

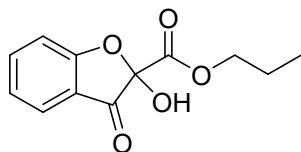

**propyl 2-hydroxy-3-oxo-2,3-dihydrobenzofuran-2-carboxylate**

**3c:** Flash column chromatography (petroleum/ethyl acetate 4:1) afforded the product as a white solid;  $^1\text{H}$  NMR (500 MHz,  $\text{CDCl}_3$ )  $\delta$  7.74 – 7.65 (m, 2H), 7.21 – 7.09 (m, 2H), 5.34 (s, 1H), 4.25 – 4.18 (m, 2H), 1.65 – 1.57 (m, 2H), 0.81 (dd,  $J = 10.6, 4.3$  Hz, 3H);  $^{13}\text{C}$  NMR (126 MHz,  $\text{CDCl}_3$ )  $\delta$  193.85, 171.38, 166.98, 139.17, 125.34, 123.11, 118.93, 113.45, 97.71, 69.33, 21.65, 9.88.

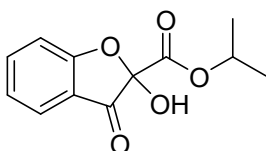

**isopropyl 2-hydroxy-3-oxo-2,3-dihydrobenzofuran-2-carboxylate**

**3d:** Flash column chromatography (petroleum/ethyl acetate 4:1) afforded the product as a white solid;  $^1\text{H}$  NMR (500 MHz,  $\text{CDCl}_3$ )  $\delta$  7.74 – 7.63 (m, 2H), 7.21 – 7.09 (m, 2H), 5.39 (s, 1H), 5.21 – 5.07 (m, 1H), 1.22 (dd,  $J = 6.3, 1.1$  Hz, 6H);  $^{13}\text{C}$  NMR (126 MHz,  $\text{CDCl}_3$ )  $\delta$  194.00, 171.48, 166.43, 139.11, 125.33, 123.03, 118.90, 113.45, 97.65, 72.72, 21.35 (d,  $J = 5.5$  Hz).

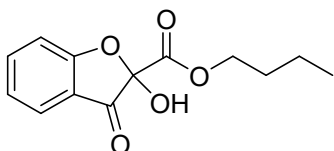

**butyl 2-hydroxy-3-oxo-2,3-dihydrobenzofuran-2-carboxylate**

**3e:** Flash column chromatography (petroleum/ethyl acetate 4:1) afforded the product as a colorless liquid;  $^1\text{H}$  NMR (500 MHz,  $\text{CDCl}_3$ )  $\delta$  7.75 – 7.64 (m, 2H), 7.21 – 7.09 (m, 2H), 5.41 (s, 1H), 4.25 (qt,  $J = 10.7, 6.6$  Hz, 2H), 1.62 – 1.51 (m, 2H), 1.23 (dt,  $J = 14.8, 7.4$  Hz, 2H), 0.83 (t,  $J = 7.4$  Hz, 3H);  $^{13}\text{C}$  NMR (126 MHz,  $\text{CDCl}_3$ )  $\delta$  193.93, 171.38, 166.92, 139.19, 125.34, 123.10, 118.91, 113.45, 97.78, 67.73, 30.12, 18.68, 13.47.

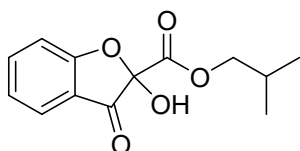

**isobutyl 2-hydroxy-3-oxo-2,3-dihydrobenzofuran-2-carboxylate**

**3f:** Flash column chromatography (petroleum/ethyl acetate 4:1) afforded the product as a colorless liquid;  $^1\text{H}$  NMR (500 MHz,  $\text{CDCl}_3$ )  $\delta$  7.74 – 7.65 (m, 2H), 7.20 – 7.11 (m, 2H), 5.30 (s, 1H), 4.07 – 4.00 (m, 2H), 1.88 (dt,  $J = 13.4, 6.7$  Hz, 1H), 0.82 – 0.77 (m, 6H);  $^{13}\text{C}$  NMR (126 MHz,  $\text{CDCl}_3$ )  $\delta$  193.83, 171.33, 166.93, 139.16, 125.29, 123.11, 119.02, 113.40, 97.79, 73.46, 27.56, 18.54.

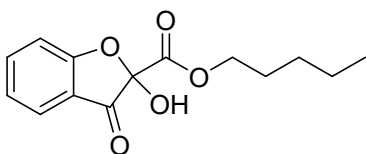

**pentyl 2-hydroxy-3-oxo-2,3-dihydrobenzofuran-2-carboxylate**

**3g:** Flash column chromatography (petroleum/ethyl acetate 4:1) afforded the product as a colorless liquid;  $^1\text{H}$  NMR (500 MHz,  $\text{CDCl}_3$ )  $\delta$  7.73 – 7.65 (m, 2H), 7.19 – 7.10 (m, 2H), 5.28 (s, 1H), 4.29 – 4.19 (m, 2H), 1.58 (dt,  $J = 13.9, 6.8$  Hz, 2H), 1.26 – 1.15 (m, 4H), 0.81 (t,  $J = 7.1$  Hz, 3H);  $^{13}\text{C}$  NMR (126 MHz,  $\text{CDCl}_3$ )  $\delta$  193.81, 171.37, 166.97, 139.16, 125.34, 123.11, 118.97, 113.45, 97.68, 68.06, 27.78, 27.52, 22.04, 13.86.

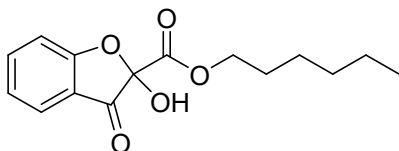

**hexyl 2-hydroxy-3-oxo-2,3-dihydrobenzofuran-2-carboxylate**

**3h:** Flash column chromatography (petroleum/ethyl acetate 4:1) afforded the product as a colorless liquid;  $^1\text{H}$  NMR (500 MHz,  $\text{CDCl}_3$ )  $\delta$  7.61 (dd,  $J = 17.2, 7.6$  Hz, 2H), 7.16 – 6.92 (m, 2H), 5.31 (s, 1H), 4.16 (td,  $J = 6.7, 2$  Hz, 2H), 1.56 – 1.41 (m, 2H), 1.18 – 1.00 (m, 6H), 0.74 (t,  $J = 6.9$  Hz, 3H);  $^{13}\text{C}$  NMR (126 MHz,  $\text{CDCl}_3$ )  $\delta$  189.09, 166.61, 162.17, 134.38, 120.57, 118.33, 114.21, 108.68, 93.01, 63.23, 26.29, 23.29, 20.24, 17.61, 9.11.

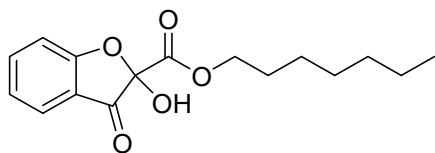

**heptyl 2-hydroxy-3-oxo-2,3-dihydrobenzofuran-2-carboxylate**

**3i:** Flash column chromatography (petroleum/ethyl acetate 4:1) afforded the product as a colorless liquid;  $^1\text{H}$  NMR (500 MHz,  $\text{CDCl}_3$ )  $\delta$  7.69 (dd,  $J = 16.7, 8.0$  Hz, 2H), 7.21 – 7.10 (m, 2H), 5.29 (s, 1H), 4.24 (td,  $J = 6.6, 2.2$  Hz, 2H), 1.58 (dd,  $J = 13.4, 6.6$  Hz, 2H), 1.24 – 1.13 (m, 8H), 0.85 (t,  $J = 7.0$  Hz, 3H);  $^{13}\text{C}$  NMR (126 MHz,  $\text{CDCl}_3$ )  $\delta$  193.81, 171.37, 166.98, 139.15, 125.34, 123.11, 118.97, 113.45, 97.68, 68.04, 31.54, 28.58, 28.10, 25.29, 22.45, 14.07.

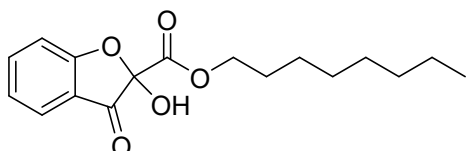

**octyl 2-hydroxy-3-oxo-2,3-dihydrobenzofuran-2-carboxylate**

**3j:** Flash column chromatography (petroleum/ethyl acetate 4:1) afforded the product as a colorless liquid;  $^1\text{H}$  NMR (500 MHz,  $\text{CDCl}_3$ )  $\delta$  7.69 (dd,  $J = 17.8, 7.8$  Hz, 2H), 7.22 – 7.07 (m, 2H), 5.28 (s, 1H), 4.29 – 4.19 (m, 2H), 1.65 – 1.50 (m, 2H), 1.22 (d,  $J = 32.2$  Hz, 10H), 0.87 (t,  $J = 7.1$  Hz, 3H);  $^{13}\text{C}$  NMR (126 MHz,  $\text{CDCl}_3$ )  $\delta$  189.02, 166.61, 162.22, 134.36, 120.57, 118.34, 114.23, 108.68, 92.93, 63.28, 26.88, 24.27, 24.13, 23.36, 20.59, 17.86, 9.34.

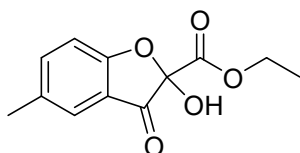

**ethyl 2-hydroxy-5-methyl-3-oxo-2,3-dihydrobenzofuran-2-carboxylate**

**3k:** Flash column chromatography (petroleum/ethyl acetate 4:1) afforded the product as a white solid;  $^1\text{H}$  NMR (500 MHz,  $\text{CDCl}_3$ )  $\delta$  7.49 (d,  $J = 8.2$  Hz, 2H), 7.03 (d,  $J = 8.3$  Hz, 1H), 4.34 – 4.26 (m, 2H), 2.37 (s, 3H), 1.23 (d,  $J = 7.1$  Hz, 3H), 0.86 (t,  $J = 7.2$  Hz, 3H);  $^{13}\text{C}$  NMR (126 MHz,  $\text{CDCl}_3$ )  $\delta$  193.97, 169.90, 167.04, 140.39, 132.89, 124.78, 118.74, 113.10, 97.90, 64.00, 20.65, 13.87.

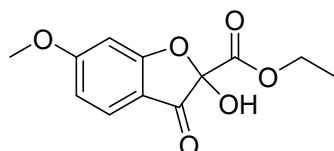

**ethyl 2-hydroxy-6-methoxy-3-oxo-2,3-dihydrobenzofuran-2-carboxylate**

**3l:** Flash column chromatography (petroleum/ethyl acetate 4:1) afforded the product as

a white solid;  $^1\text{H}$  NMR (500 MHz,  $\text{CDCl}_3$ )  $\delta$  7.60 (dd,  $J = 8.6, 2.9$  Hz, 1H), 6.70 (d,  $J = 8.6$  Hz, 1H), 6.55 (t,  $J = 2.5$  Hz, 1H), 5.42 (s, 1H), 4.36 – 4.24 (m, 2H), 3.90 (d,  $J = 2.9$  Hz, 3H), 1.26 – 1.22 (m, 3H);  $^{13}\text{C}$  NMR (126 MHz,  $\text{CDCl}_3$ )  $\delta$  191.35, 174.02, 169.19, 167.00, 126.61, 112.41, 111.85, 98.68, 96.66, 63.99, 56.13, 13.89.

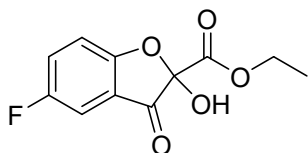

**ethyl 5-fluoro-2-hydroxy-3-oxo-2,3-dihydrobenzofuran-2-carboxylate**

**3m:** Flash column chromatography (petroleum/ethyl acetate 4:1) afforded the product as a white solid;  $^1\text{H}$  NMR (500 MHz,  $\text{CDCl}_3$ )  $\delta$  7.41 (td,  $J = 8.7, 2.6$  Hz, 1H), 7.35 (dd,  $J = 6.4, 2.6$  Hz, 1H), 7.11 (dd,  $J = 8.9, 3.5$  Hz, 1H), 4.37 – 4.26 (m, 2H), 1.24 (d,  $J = 7.1$  Hz, 3H);  $^{13}\text{C}$  NMR (126 MHz,  $\text{CDCl}_3$ )  $\delta$  193.40 (d,  $J = 2.9$  Hz), 167.06 (d,  $J = 124.8$  Hz), 159.23, 157.29, 126.72 (d,  $J = 25.7$  Hz), 119.40 (d,  $J = 8.2$  Hz), 114.72 (d,  $J = 7.6$  Hz), 110.55 (d,  $J = 24.1$  Hz), 98.54, 64.24, 13.86;  $^{19}\text{F}$  NMR ( $\text{CDCl}_3$ , 376 MHz, 298 K)  $\delta = -119.09$  (ddd,  $J = 8.7, 6.7, 3.7$  Hz).

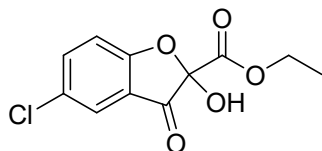

**ethyl 5-chloro-2-hydroxy-3-oxo-2,3-dihydrobenzofuran-2-carboxylate**

**3n:** Flash column chromatography (petroleum/ethyl acetate 4:1) afforded the product as a white solid;  $^1\text{H}$  NMR (500 MHz,  $\text{CDCl}_3$ )  $\delta$  7.66 (d,  $J = 2.2$  Hz, 1H), 7.62 (dd,  $J = 8.8, 2.3$  Hz, 1H), 7.10 (d,  $J = 8.8$  Hz, 1H), 4.31 (dd,  $J = 8.9, 7.2$  Hz, 2H), 1.24 (t,  $J = 7.1$  Hz, 3H);  $^{13}\text{C}$  NMR (126 MHz,  $\text{CDCl}_3$ )  $\delta$  192.73, 169.69, 166.43, 138.96, 128.64, 124.70, 120.00, 114.88, 98.40, 64.28, 13.86.

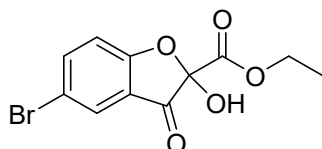

**ethyl 5-bromo-2-hydroxy-3-oxo-2,3-dihydrobenzofuran-2-carboxylate**

**3o:** Flash column chromatography (petroleum/ethyl acetate 4:1) afforded the product as a colorless liquid;  $^1\text{H}$  NMR (500 MHz,  $\text{CDCl}_3$ )  $\delta$  7.82 (d,  $J = 2.1$  Hz, 1H), 7.76 (dd,

$J = 8.8, 2.2$  Hz, 1H), 7.05 (d,  $J = 8.8$  Hz, 1H), 5.43 (s, 1H), 4.31 (dd,  $J = 9.3, 7.2$  Hz, 2H), 1.24 (t,  $J = 7.1$  Hz, 3H);  $^{13}\text{C}$  NMR (126 MHz,  $\text{CDCl}_3$ )  $\delta$  192.48, 170.11, 166.41, 141.67, 127.83, 120.54, 115.63, 115.32, 98.21, 64.32, 13.88.

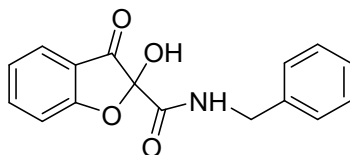

***N*-benzyl-2-hydroxy-3-oxo-2,3-dihydrobenzofuran-2-carboxamide**

**5a:** Flash column chromatography (petroleum/ethyl acetate 4:1) afforded the product as a white solid;  $^1\text{H}$  NMR (500 MHz,  $\text{DMSO-}d_6$ )  $\delta$  9.02 (t,  $J = 6.3$  Hz, 1H), 8.89 (s, 1H), 7.77 (t,  $J = 7.8$  Hz, 1H), 7.66 (d,  $J = 7.4$  Hz, 1H), 7.33 (t,  $J = 7.5$  Hz, 2H), 7.30 – 7.22 (m, 4H), 7.18 (t,  $J = 7.4$  Hz, 1H), 4.31 (d,  $J = 6.4$  Hz, 2H);  $^{13}\text{C}$  NMR (126 MHz,  $\text{CDCl}_3$ )  $\delta$  197.67, 171.82, 165.66, 139.72, 139.39, 128.72, 127.58, 127.29, 124.96, 122.89, 119.49, 113.70, 101.15, 42.53.

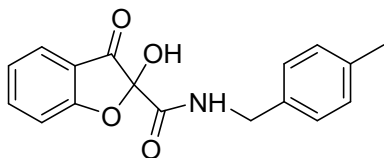

**2-hydroxy-*N*-(4-methylbenzyl)-3-oxo-2,3-dihydrobenzofuran-2-carboxamide**

**5b:** Flash column chromatography (petroleum/ethyl acetate 4:1) afforded the product as a white solid;  $^1\text{H}$  NMR (500 MHz,  $\text{DMSO-}d_6$ )  $\delta$  8.97 (t,  $J = 6.3$  Hz, 1H), 8.87 (s, 1H), 7.76 (dd,  $J = 11.4, 4.1$  Hz, 1H), 7.65 (d,  $J = 7.5$  Hz, 1H), 7.24 (d,  $J = 8.3$  Hz, 1H), 7.20 – 7.10 (m, 5H), 4.25 (d,  $J = 6.3$  Hz, 2H), 2.28 (s, 3H);  $^{13}\text{C}$  NMR (126 MHz,  $\text{DMSO-}d_6$ )  $\delta$  197.66, 171.80, 165.54, 139.69, 136.37, 136.33, 129.24, 127.63, 124.93, 122.86, 119.50, 113.68, 101.13, 42.29, 21.15.

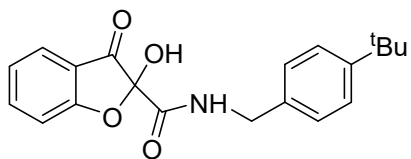

***N*-(4-(*tert*-butyl)benzyl)-2-hydroxy-3-oxo-2,3-dihydrobenzofuran-2-carboxamide**

**5c:** Flash column chromatography (petroleum/ethyl acetate 4:1) afforded the product

as a colorless liquid;  $^1\text{H}$  NMR (500 MHz,  $\text{DMSO-}d_6$ )  $\delta$  8.97 (t,  $J = 6.3$  Hz, 1H), 8.86 (s, 1H), 7.79 – 7.72 (m, 1H), 7.67 – 7.61 (m, 1H), 7.33 (d,  $J = 8.2$  Hz, 2H), 7.23 (d,  $J = 8.3$  Hz, 1H), 7.20 – 7.11 (m, 3H), 4.25 (d,  $J = 6.4$  Hz, 2H), 1.26 (s, 9H);  $^{13}\text{C}$  NMR (126 MHz,  $\text{DMSO-}d_6$ )  $\delta$  197.67, 171.80, 165.53, 149.65, 139.69, 136.39, 127.41, 125.45, 124.93, 122.86, 119.50, 113.68, 101.13, 42.20, 34.64, 31.64.

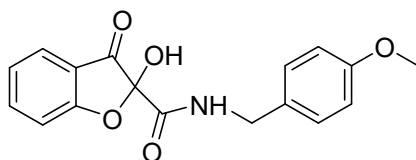

**2-hydroxy-N-(4-methoxybenzyl)-3-oxo-2,3-dihydrobenzofuran-2-carboxamide**

**5d:** Flash column chromatography (petroleum/ethyl acetate 4:1) afforded the product as a white solid;  $^1\text{H}$  NMR (500 MHz,  $\text{DMSO-}d_6$ )  $\delta$  8.94 (t,  $J = 6.3$  Hz, 1H), 8.85 (s, 1H), 7.76 (t,  $J = 7.8$  Hz, 1H), 7.64 (d,  $J = 7.5$  Hz, 1H), 7.23 (d,  $J = 8.4$  Hz, 1H), 7.17 (t,  $J = 8.6$  Hz, 3H), 6.88 (d,  $J = 8.5$  Hz, 2H), 4.21 (d,  $J = 6.3$  Hz, 2H), 3.73 (s, 3H);  $^{13}\text{C}$  NMR (126 MHz,  $\text{DMSO-}d_6$ )  $\delta$  197.67, 171.79, 165.46, 158.69, 139.68, 131.37, 129.04, 124.93, 122.86, 119.50, 114.10, 113.68, 101.12, 55.51, 41.99.

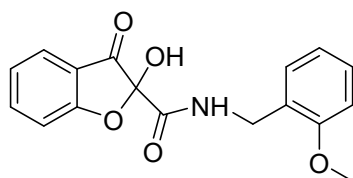

**2-hydroxy-N-(2-methoxybenzyl)-3-oxo-2,3-dihydrobenzofuran-2-carboxamide**

**5e:** Flash column chromatography (petroleum/ethyl acetate 4:1) afforded the product as a white solid;  $^1\text{H}$  NMR (500 MHz,  $\text{DMSO-}d_6$ )  $\delta$  8.94 (d,  $J = 1.5$  Hz, 1H), 8.77 (t,  $J = 6.0$  Hz, 1H), 7.81 – 7.74 (m, 1H), 7.70 – 7.64 (m, 1H), 7.25 (dd,  $J = 12.6, 4.8$  Hz, 2H), 7.18 (t,  $J = 7.4$  Hz, 1H), 7.13 (d,  $J = 7.4$  Hz, 1H), 6.98 (d,  $J = 8.1$  Hz, 1H), 6.93 (t,  $J = 7.4$  Hz, 1H), 4.28 (t,  $J = 6.4$  Hz, 2H), 3.81 (s, 3H);  $^{13}\text{C}$  NMR (126 MHz,  $\text{DMSO-}d_6$ )  $\delta$  197.68, 171.84, 165.69, 156.87, 139.75, 128.45, 127.12, 126.44, 124.97, 122.91, 120.56, 119.46, 113.70, 110.81, 101.13, 55.76, 37.76.

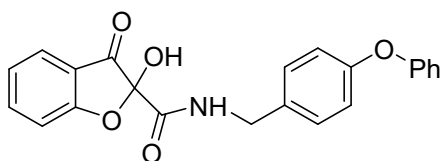

**2-hydroxy-3-oxo-N-(4-phenoxybenzyl)-2,3-dihydrobenzofuran-2-carboxamide**



**5f:** Flash column chromatography (petroleum/ethyl acetate 4:1) afforded the product as a colorless liquid;  $^1\text{H}$  NMR (500 MHz,  $\text{DMSO-}d_6$ )  $\delta$  9.04 (t,  $J = 6.3$  Hz, 1H), 8.90 (s, 1H), 7.76 (dd,  $J = 11.4, 4.2$  Hz, 1H), 7.65 (d,  $J = 7.4$  Hz, 1H), 7.38 (t,  $J = 7.9$  Hz, 2H), 7.26 (dd,  $J = 19.4, 8.4$  Hz, 3H), 7.15 (dt,  $J = 20.7, 7.4$  Hz, 2H), 6.99 (dd,  $J = 7.9, 6.8$  Hz, 4H), 4.28 (d,  $J = 6.3$  Hz, 2H);  $^{13}\text{C}$  NMR (126 MHz,  $\text{DMSO-}d_6$ )  $\delta$  197.66, 171.81, 165.62, 157.35, 155.87, 139.72, 134.61, 130.50, 129.43, 124.96, 123.76, 122.89, 119.48, 119.12, 118.83, 113.69, 101.13, 42.01.

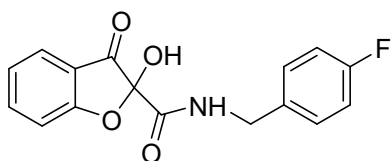

***N*-(4-fluorobenzyl)-2-hydroxy-3-oxo-2,3-dihydrobenzofuran-2-carboxamide**

**5g:** Flash column chromatography (petroleum/ethyl acetate 4:1) afforded the product as a colorless liquid;  $^1\text{H}$  NMR (500 MHz,  $\text{CDCl}_3$ )  $\delta$  7.59 (t,  $J = 7.5$  Hz, 1H), 7.53 (d,  $J = 7.3$  Hz, 1H), 7.22 – 7.13 (m, 2H), 7.12 – 6.93 (m, 5H), 6.44 (s, 1H), 4.30 (d,  $J = 5.3$  Hz, 2H);  $^{13}\text{C}$  NMR (126 MHz,  $\text{CDCl}_3$ )  $\delta$  195.96, 171.78, 165.19, 163.29, 139.50, 132.56 (d,  $J = 3.2$  Hz), 129.48 (d,  $J = 8.2$  Hz), 125.38, 123.09, 118.46, 115.67 (d,  $J = 21.5$  Hz), 113.61, 99.60, 43.11;  $^{19}\text{F}$  NMR ( $\text{CDCl}_3$ , 376 MHz, 298 K)  $\delta = -114.23 - -114.45$  (m).

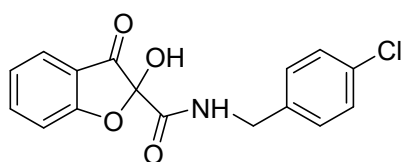

***N*-(4-chlorobenzyl)-2-hydroxy-3-oxo-2,3-dihydrobenzofuran-2-carboxamide**

**5h:** Flash column chromatography (petroleum/ethyl acetate 4:1) afforded the product as a colorless liquid;  $^1\text{H}$  NMR (500 MHz,  $\text{DMSO-}d_6$ )  $\delta$  9.08 (t,  $J = 6.3$  Hz, 1H), 8.91 (s, 1H), 7.76 (dd,  $J = 11.4, 4.1$  Hz, 1H), 7.65 (d,  $J = 7.4$  Hz, 1H), 7.39 (d,  $J = 8.3$  Hz, 2H), 7.25 (dd,  $J = 15.6, 8.3$  Hz, 3H), 7.17 (t,  $J = 7.4$  Hz, 1H), 4.27 (d,  $J = 6.4$  Hz, 2H);  $^{13}\text{C}$  NMR (126 MHz,  $\text{DMSO-}d_6$ )  $\delta$  197.59, 171.80, 165.75, 139.74, 138.45, 131.89, 129.51, 128.68, 124.96, 122.91, 119.44, 113.69, 101.11, 41.96.

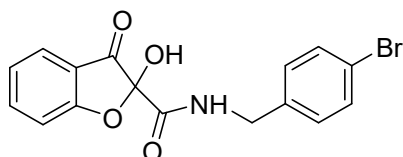

***N*-(4-bromobenzyl)-2-hydroxy-3-oxo-2,3-dihydrobenzofuran-2-carboxamide**

**5i:** Flash column chromatography (petroleum/ethyl acetate 4:1) afforded the product as a white solid;  $^1\text{H}$  NMR (500 MHz,  $\text{DMSO-}d_6$ )  $\delta$  9.10 (t,  $J = 6.2$  Hz, 1H), 8.91 (s, 1H), 7.77 (t,  $J = 7.4$  Hz, 1H), 7.65 (d,  $J = 7.6$  Hz, 1H), 7.53 (d,  $J = 8.3$  Hz, 2H), 7.28 – 7.13 (m, 4H), 4.25 (d,  $J = 6.2$  Hz, 2H);  $^{13}\text{C}$  NMR (126 MHz,  $\text{DMSO-}d_6$ )  $\delta$  197.59, 171.79, 165.73, 139.75, 138.88, 131.60, 129.89, 124.97, 122.92, 120.37, 119.43, 113.69, 101.09, 42.02.

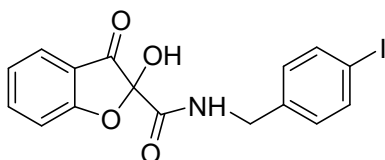

**2-hydroxy-*N*-(4-iodobenzyl)-3-oxo-2,3-dihydrobenzofuran-2-carboxamide**

**5j:** Flash column chromatography (petroleum/ethyl acetate 4:1) afforded the titled thiocyanation indole as a white solid;  $^1\text{H}$  NMR (500 MHz,  $\text{DMSO-}d_6$ )  $\delta$  9.08 (s, 1H), 8.91 (d,  $J = 3.7$  Hz, 1H), 7.77 (t,  $J = 7.7$  Hz, 1H), 7.69 (d,  $J = 7.1$  Hz, 2H), 7.65 (d,  $J = 7.5$  Hz, 1H), 7.24 (d,  $J = 8.3$  Hz, 1H), 7.17 (t,  $J = 7.4$  Hz, 1H), 7.07 (d,  $J = 7.4$  Hz, 2H), 4.23 (d,  $J = 5.7$  Hz, 2H);  $^{13}\text{C}$  NMR (126 MHz,  $\text{DMSO-}d_6$ )  $\delta$  197.59, 171.79, 165.71, 139.75, 139.27, 137.45, 130.06, 124.97, 122.92, 119.43, 113.69, 101.09, 93.15, 42.14.

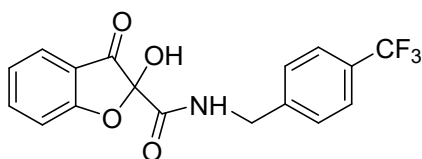

**2-hydroxy-3-oxo-*N*-(4-(trifluoromethyl)benzyl)-2,3-dihydrobenzofuran-2-carboxamide**

**5k:** Flash column chromatography (petroleum/ethyl acetate 4:1) afforded the product as a white solid;  $^1\text{H}$  NMR (500 MHz,  $\text{DMSO-}d_6$ )  $\delta$  9.18 (t,  $J = 6.3$  Hz, 1H), 8.94 (s, 1H), 7.80 – 7.74 (m, 1H), 7.71 (d,  $J = 8.1$  Hz, 2H), 7.67 – 7.63 (m, 1H), 7.47 (d,  $J = 8.0$  Hz, 2H), 7.25 (d,  $J = 8.4$  Hz, 1H), 7.18 (t,  $J = 7.4$  Hz, 1H), 4.38 (d,  $J = 6.3$  Hz, 2H);  $^{13}\text{C}$  NMR (126 MHz,  $\text{DMSO-}d_6$ )  $\delta$  197.56, 171.80, 165.89, 144.26, 139.76, 128.25, 125.89, 125.65, 124.97, 123.72, 122.93, 119.41, 113.69, 101.11, 42.28;  $^{19}\text{F}$  NMR ( $\text{DMSO-}d_6$ ,

376 MHz, 298 K)  $\delta = -60.81$ .

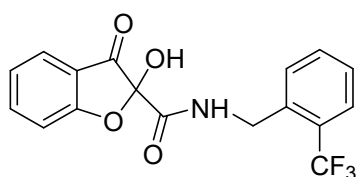

**2-hydroxy-3-oxo-N-(2-(trifluoromethyl)benzyl)-2,3-dihydrobenzofuran-2-carboxamide**

**5l:** Flash column chromatography (petroleum/ethyl acetate 4:1) afforded the titled thiocyanation indole as a white solid;  $^1\text{H}$  NMR (500 MHz,  $\text{DMSO-}d_6$ )  $\delta$  9.17 (t,  $J = 6.0$  Hz, 1H), 7.77 (t,  $J = 7.8$  Hz, 1H), 7.74 – 7.63 (m, 3H), 7.48 (t,  $J = 7.7$  Hz, 2H), 7.25 (d,  $J = 8.4$  Hz, 1H), 7.17 (t,  $J = 7.4$  Hz, 1H), 4.50 (dd,  $J = 12.6, 5.3$  Hz, 2H);  $^{13}\text{C}$  NMR (126 MHz,  $\text{DMSO-}d_6$ )  $\delta$  197.53, 171.84, 166.08, 139.84, 137.34, 133.09, 127.81 (d,  $J = 3.6$  Hz), 126.50, 126.25 (d,  $J = 4.2$  Hz), 125.97, 125.02, 123.79, 122.99, 119.35, 113.72, 101.14, 39.09;  $^{19}\text{F}$  NMR ( $\text{DMSO-}d_6$ , 376 MHz, 298 K)  $\delta = -59.40$ .

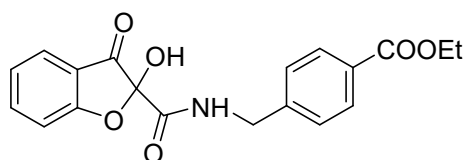

**ethyl 4-((2-hydroxy-3-oxo-2,3-dihydrobenzofuran-2-carboxamido)methyl)benzoate**

**5m:** Flash column chromatography (petroleum/ethyl acetate 4:1) afforded the product as a colorless liquid;  $^1\text{H}$  NMR (500 MHz,  $\text{CDCl}_3$ )  $\delta$  7.89 (d,  $J = 8.1$  Hz, 2H), 7.56 (t,  $J = 7.5$  Hz, 1H), 7.51 (d,  $J = 7.6$  Hz, 1H), 7.31 – 7.26 (m, 1H), 7.24 (d,  $J = 8.1$  Hz, 2H), 7.02 (dd,  $J = 15.7, 8.0$  Hz, 2H), 6.76 (s, 1H), 4.44 – 4.36 (m, 2H), 4.29 (q,  $J = 7.2$  Hz, 2H), 1.35 (t,  $J = 7.1$  Hz, 3H);  $^{13}\text{C}$  NMR (126 MHz,  $\text{CDCl}_3$ )  $\delta$  196.07, 171.81, 166.67, 165.45, 142.21, 139.37, 129.96, 129.46, 127.39, 125.22, 122.92, 118.51, 113.53, 99.80, 61.25, 43.23, 14.28.

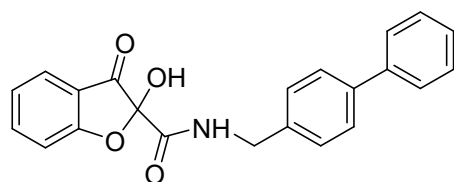

**N-([1,1'-biphenyl]-4-ylmethyl)-2-hydroxy-3-oxo-2,3-dihydrobenzofuran-2-carboxamide**

**5n:** Flash column chromatography (petroleum/ethyl acetate 4:1) afforded the product as a colorless liquid;  $^1\text{H}$  NMR (500 MHz,  $\text{CDCl}_3$ )  $\delta$  7.60 (t,  $J = 8.1$  Hz, 2H), 7.53 (t,  $J = 8.3$  Hz, 4H), 7.43 (t,  $J = 7.4$  Hz, 2H), 7.37 – 7.32 (m, 1H), 7.31 – 7.25 (m, 2H), 7.15

– 7.02 (m, 2H), 6.94 (s, 1H), 4.43 (d,  $J = 5.4$  Hz, 2H), 2.01 (s, 1H);  $^{13}\text{C}$  NMR (126 MHz,  $\text{DMSO-}d_6$ )  $\delta$  197.69, 171.84, 165.72, 140.42, 139.73, 139.25, 138.65, 129.41, 128.28, 127.82, 127.08, 124.97, 122.91, 119.51, 113.71, 101.19, 56.54, 42.32.

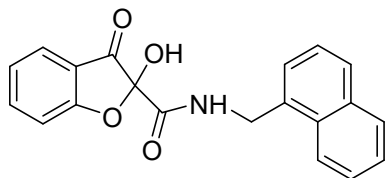

**2-hydroxy-*N*-(naphthalen-1-ylmethyl)-3-oxo-2,3-dihydrobenzofuran-2-carboxamide**

**5o:** Flash column chromatography (petroleum/ethyl acetate 4:1) afforded the product as a yellow solid;  $^1\text{H}$  NMR (500 MHz,  $\text{CDCl}_3$ )  $\delta$  7.86 (dd,  $J = 14.0, 8.1$  Hz, 2H), 7.81 – 7.77 (m, 1H), 7.55 – 7.46 (m, 4H), 7.41 – 7.36 (m, 2H), 7.03 (d,  $J = 8.3$  Hz, 1H), 6.98 (t,  $J = 7.4$  Hz, 1H), 6.89 (s, 1H), 6.36 (s, 1H), 4.83 (d,  $J = 5.5$  Hz, 2H);  $^{13}\text{C}$  NMR (126 MHz,  $\text{DMSO-}d_6$ )  $\delta$  197.69, 171.85, 165.74, 139.75, 134.36, 133.69, 131.14, 128.98, 127.94, 126.72, 126.28, 125.84, 125.25, 124.99, 123.85, 122.93, 119.50, 113.72, 101.20, 40.62.

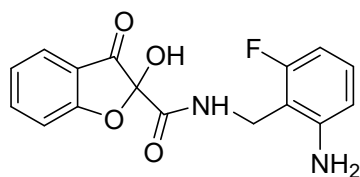

***N*-(2-amino-6-fluorobenzyl)-2-hydroxy-3-oxo-2,3-dihydrobenzofuran-2-carboxamide**

**5p:** Flash column chromatography (petroleum/ethyl acetate 4:1) afforded the product as a yellow solid;  $^1\text{H}$  NMR (500 MHz,  $\text{DMSO-}d_6$ )  $\delta$  8.90 (s, 1H), 8.80 (t,  $J = 5.9$  Hz, 1H), 7.77 (t,  $J = 7.8$  Hz, 1H), 7.64 (d,  $J = 7.6$  Hz, 1H), 7.22 (d,  $J = 8.4$  Hz, 1H), 7.17 (t,  $J = 7.4$  Hz, 1H), 6.98 (dd,  $J = 14.9, 8.0$  Hz, 1H), 6.44 (d,  $J = 8.0$  Hz, 1H), 6.29 (t,  $J = 8.9$  Hz, 1H), 5.52 (s, 2H), 4.23 (ddd,  $J = 34.7, 14.5, 6.1$  Hz, 2H);  $^{13}\text{C}$  NMR (126 MHz,  $\text{DMSO-}d_6$ )  $\delta$  197.47, 171.69, 166.09, 161.28, 149.62, 139.72, 129.61, 124.94, 122.93, 119.49, 113.68, 111.09, 108.74, 102.42, 100.95, 60.26;  $^{19}\text{F}$  NMR ( $\text{DMSO-}d_6$ , 376 MHz, 298 K)  $\delta = -113.10 - -120.41$  (m).

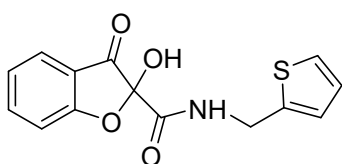

**2-hydroxy-3-oxo-*N*-(thiophen-2-ylmethyl)-2,3-dihydrobenzofuran-2-carboxamide**

**5q:** Flash column chromatography (petroleum/ethyl acetate 4:1) afforded the product as a yellow solid;  $^1\text{H}$  NMR (500 MHz,  $\text{DMSO-}d_6$ )  $\delta$  9.07 (t,  $J = 6.2$  Hz, 1H), 8.86 (s, 1H), 7.76 (t,  $J = 7.8$  Hz, 1H), 7.64 (d,  $J = 7.5$  Hz, 1H), 7.39 (dd,  $J = 4.6, 1.6$  Hz, 1H), 7.23 (d,  $J = 8.3$  Hz, 1H), 7.17 (t,  $J = 7.4$  Hz, 1H), 6.99 – 6.90 (m, 2H), 4.43 (dd,  $J = 6.2, 1.8$  Hz, 2H);  $^{13}\text{C}$  NMR (126 MHz,  $\text{DMSO-}d_6$ )  $\delta$  197.47, 171.75, 165.47, 142.02, 139.71, 127.05, 126.11, 125.63, 124.95, 122.90, 119.47, 113.70, 101.04, 37.74.

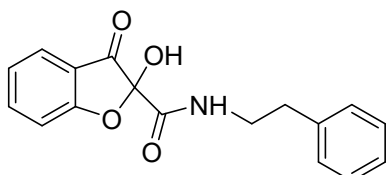

**2-hydroxy-3-oxo-N-phenethyl-2,3-dihydrobenzofuran-2-carboxamide**

**5r:** Flash column chromatography (petroleum/ethyl acetate 4:1) afforded the product as a colorless liquid;  $^1\text{H}$  NMR (500 MHz,  $\text{CDCl}_3$ )  $\delta$  7.58 – 7.51 (m, 2H), 7.26 (t,  $J = 7.3$  Hz, 3H), 7.12 (d,  $J = 7.1$  Hz, 2H), 7.03 (t,  $J = 7.4$  Hz, 2H), 6.66 (t,  $J = 5.7$  Hz, 1H), 6.52 (s, 1H), 3.44 (dd,  $J = 13.4, 6.9$  Hz, 2H), 2.76 (t,  $J = 7.1$  Hz, 2H);  $^{13}\text{C}$  NMR (126 MHz,  $\text{CDCl}_3$ )  $\delta$  196.01, 171.65, 165.10, 139.31, 138.20, 128.82, 128.70, 126.67, 125.24, 122.95, 118.63, 113.52, 99.73, 41.24, 35.27.

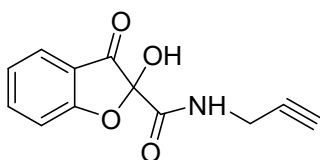

**2-hydroxy-3-oxo-N-(prop-2-yn-1-yl)-2,3-dihydrobenzofuran-2-carboxamide**

**5s:** Flash column chromatography (petroleum/ethyl acetate 4:1) afforded the product as a white solid;  $^1\text{H}$  NMR (500 MHz,  $\text{DMSO-}d_6$ )  $\delta$  8.90 (s, 1H), 7.80 – 7.75 (m, 1H), 7.65 (d,  $J = 7.6$  Hz, 1H), 7.24 (d,  $J = 8.3$  Hz, 1H), 7.18 (t,  $J = 7.4$  Hz, 1H), 3.88 – 3.82 (m, 2H), 3.12 (s, 1H);  $^{13}\text{C}$  NMR (126 MHz,  $\text{DMSO-}d_6$ )  $\delta$  197.35, 171.68, 165.47, 139.77, 124.96, 122.97, 119.43, 113.70, 100.89, 81.12, 73.36, 28.64.

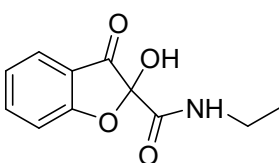

**N-ethyl-2-hydroxy-3-oxo-2,3-dihydrobenzofuran-2-carboxamide**

**5aa:** Flash column chromatography (petroleum/ethyl acetate 4:1) afforded the product as a white solid;  $^1\text{H}$  NMR (500 MHz,  $\text{DMSO-}d_6$ )  $\delta$  8.79 (s, 1H), 8.46 (t,  $J = 5.7$  Hz, 1H), 7.76 (t,  $J = 7.8$  Hz, 1H), 7.64 (d,  $J = 7.6$  Hz, 1H), 7.23 (d,  $J = 8.3$  Hz, 1H), 7.17 (t,  $J = 7.4$  Hz, 1H), 3.20 – 3.03 (m, 2H), 1.03 (t,  $J = 7.1$  Hz, 3H);  $^{13}\text{C}$  NMR (126 MHz,  $\text{DMSO-}d_6$ )  $\delta$  197.80, 171.79, 165.20, 139.62, 124.88, 122.80, 119.59, 113.64, 101.00, 34.05, 15.04.

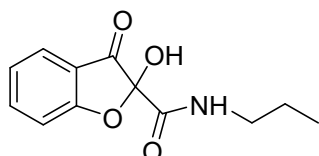

**2-hydroxy-3-oxo-N-propyl-2,3-dihydrobenzofuran-2-carboxamide**

**5ab:** Flash column chromatography (petroleum/ethyl acetate 4:1) afforded the product as a colorless liquid;  $^1\text{H}$  NMR (500 MHz,  $\text{CDCl}_3$ )  $\delta$  7.67 – 7.56 (m, 2H), 7.09 (t,  $J = 8.0$  Hz, 2H), 6.58 (s, 1H), 6.33 (s, 1H), 3.19 (dd,  $J = 13.5, 6.8$  Hz, 2H), 1.56 – 1.47 (m, 2H), 0.89 (t,  $J = 7.4$  Hz, 3H);  $^{13}\text{C}$  NMR (126 MHz,  $\text{CDCl}_3$ )  $\delta$  196.37, 171.80, 165.20, 139.14, 125.08, 122.70, 118.66, 113.47, 99.81, 41.52, 22.38, 11.19.

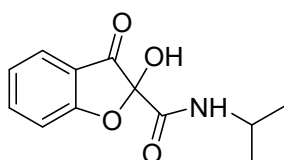

**2-hydroxy-N-isopropyl-3-oxo-2,3-dihydrobenzofuran-2-carboxamide**

**5ac:** Flash column chromatography (petroleum/ethyl acetate 4:1) afforded the product as a colorless liquid;  $^1\text{H}$  NMR (500 MHz,  $\text{CDCl}_3$ )  $\delta$  7.63 – 7.58 (m, 1H), 7.56 (d,  $J = 7.6$  Hz, 1H), 7.07 (t,  $J = 8.2$  Hz, 2H), 6.54 (s, 1H), 6.48 (d,  $J = 7.8$  Hz, 1H), 3.95 (tt,  $J = 13.3, 6.6$  Hz, 1H), 1.13 (d,  $J = 6.6$  Hz, 6H);  $^{13}\text{C}$  NMR (126 MHz,  $\text{CDCl}_3$ )  $\delta$  196.24, 171.79, 164.17, 139.24, 125.21, 122.86, 118.66, 113.55, 99.58, 42.42, 22.29.

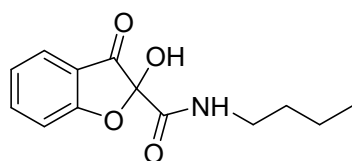

**N-butyl-2-hydroxy-3-oxo-2,3-dihydrobenzofuran-2-carboxamide**

**5ad:** Flash column chromatography (petroleum/ethyl acetate 4:1) afforded the product as a colorless liquid;  $^1\text{H}$  NMR (500 MHz,  $\text{CDCl}_3$ )  $\delta$  7.64 (t,  $J = 7.8$  Hz, 1H), 7.59 (d,  $J = 7.6$  Hz, 1H), 7.10 (t,  $J = 8.2$  Hz, 2H), 6.67 (s, 1H), 3.19 (dd,  $J = 13.4, 6.8$  Hz, 2H), 1.45 (dd,  $J = 14.8, 7.4$  Hz, 2H), 1.32 – 1.25 (m, 2H), 0.89 (t,  $J = 7.3$  Hz, 3H);  $^{13}\text{C}$  NMR (126 MHz,  $\text{CDCl}_3$ )  $\delta$  196.17, 171.79, 165.10, 139.32, 125.32, 122.91, 118.61, 113.59, 99.67, 39.17, 31.13, 19.88, 13.71.

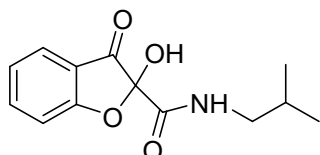

**2-hydroxy-N-isobutyl-3-oxo-2,3-dihydrobenzofuran-2-carboxamide**

**5ae:** Flash column chromatography (petroleum/ethyl acetate 4:1) afforded the product as a white solid;  $^1\text{H}$  NMR (500 MHz,  $\text{CDCl}_3$ )  $\delta$  7.69 – 7.58 (m, 2H), 7.15 – 7.06 (m, 2H), 6.59 (s, 1H), 6.29 (s, 1H), 3.05 (td,  $J = 6.7, 2.1$  Hz, 2H), 1.81 – 1.71 (m, 1H), 0.87 (dd,  $J = 6.7, 0.9$  Hz, 6H);  $^{13}\text{C}$  NMR (126 MHz,  $\text{CDCl}_3$ )  $\delta$  196.18, 171.82, 165.22, 139.30, 125.31, 122.88, 118.61, 113.59, 99.74, 47.13, 28.31, 19.90 (d,  $J = 2.6$  Hz).

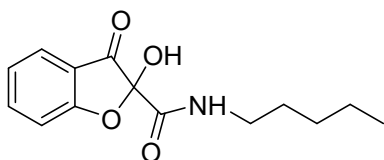

**2-hydroxy-3-oxo-N-pentyl-2,3-dihydrobenzofuran-2-carboxamide**

**5af:** Flash column chromatography (petroleum/ethyl acetate 4:1) afforded the product as a white solid;  $^1\text{H}$  NMR (500 MHz,  $\text{CDCl}_3$ )  $\delta$  7.71 – 7.59 (m, 2H), 7.13 (dd,  $J = 12.3, 5.1$  Hz, 2H), 6.51 (s, 1H), 6.21 (s, 1H), 3.22 (dd,  $J = 13.7, 6.8$  Hz, 2H), 1.49 (dt,  $J = 14.6, 7.4$  Hz, 2H), 1.32 – 1.25 (m, 4H), 0.88 (t,  $J = 7.0$  Hz, 3H);  $^{13}\text{C}$  NMR (126 MHz,  $\text{CDCl}_3$ )  $\delta$  196.15, 171.78, 165.09, 139.29, 125.32, 122.89, 118.64, 113.59, 99.68, 40.05, 28.82, 28.77, 22.26, 13.97.

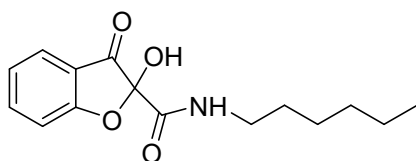

**N-hexyl-2-hydroxy-3-oxo-2,3-dihydrobenzofuran-2-carboxamide**

**5ag:** Flash column chromatography (petroleum/ethyl acetate 4:1) afforded the product

as a colorless liquid;  $^1\text{H}$  NMR (500 MHz,  $\text{CDCl}_3$ )  $\delta$  7.69 – 7.61 (m, 2H), 7.17 – 7.09 (m, 2H), 6.48 (s, 1H), 6.20 (s, 1H), 3.23 (dd,  $J = 13.8, 6.7$  Hz, 2H), 1.48 (dd,  $J = 14.1, 7.0$  Hz, 2H), 1.31 – 1.25 (m, 6H), 0.87 (t,  $J = 6.7$  Hz, 3H);  $^{13}\text{C}$  NMR (126 MHz,  $\text{CDCl}_3$ )  $\delta$  196.15, 171.78, 165.08, 139.27, 125.31, 122.88, 118.67, 113.58, 99.70, 40.08, 31.36, 29.05, 26.37, 22.51, 14.02.

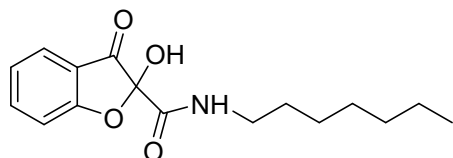

**N-heptyl-2-hydroxy-3-oxo-2,3-dihydrobenzofuran-2-carboxamide**

**5ah:** Flash column chromatography (petroleum/ethyl acetate 4:1) afforded the product as a white solid;  $^1\text{H}$  NMR (500 MHz,  $\text{CDCl}_3$ )  $\delta$  7.70 – 7.61 (m, 2H), 7.18 – 7.09 (m, 2H), 6.46 (s, 1H), 6.18 (s, 1H), 3.23 (dd,  $J = 13.8, 6.7$  Hz, 2H), 1.53 – 1.45 (m, 2H), 1.28 (d,  $J = 18.3$  Hz, 8H), 0.87 (t,  $J = 6.6$  Hz, 3H);  $^{13}\text{C}$  NMR (126 MHz,  $\text{CDCl}_3$ )  $\delta$  196.11, 171.77, 165.07, 139.30, 125.34, 122.91, 118.63, 113.59, 99.66, 40.10, 31.68, 29.08, 28.87, 26.66, 22.59, 14.10.

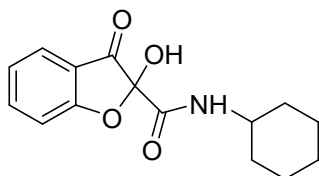

**N-cyclohexyl-2-hydroxy-3-oxo-2,3-dihydrobenzofuran-2-carboxamide**

**5ai:** Flash column chromatography (petroleum/ethyl acetate 4:1) afforded the product as a white solid;  $^1\text{H}$  NMR (500 MHz,  $\text{CDCl}_3$ )  $\delta$  7.73 – 7.58 (m, 2H), 7.21 – 7.08 (m, 2H), 6.35 (d,  $J = 7.3$  Hz, 1H), 3.69 (dd,  $J = 11.2, 7.3$  Hz, 1H), 1.87 (d,  $J = 11.6$  Hz, 2H), 1.69 (d,  $J = 12.8$  Hz, 2H), 1.60 (d,  $J = 12.7$  Hz, 1H), 1.38 – 1.24 (m, 3H), 1.21 – 1.08 (m, 3H);  $^{13}\text{C}$  NMR (126 MHz,  $\text{DMSO}-d_6$ )  $\delta$  197.78, 171.79, 164.49, 139.57, 124.87, 122.78, 119.60, 113.64, 100.92, 48.48, 32.34, 25.48, 25.28.

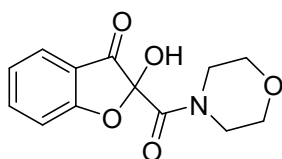

**2-hydroxy-2-(morpholine-4-carbonyl)benzofuran-3(2H)-one**

**5aj:** Flash column chromatography (petroleum/ethyl acetate 4:1) afforded the product



as a white solid;  $^1\text{H}$  NMR (500 MHz,  $\text{CDCl}_3$ )  $\delta$  11.26 (s, 1H), 7.61 – 7.54 (m, 2H), 7.07 – 7.02 (m, 1H), 6.97 (t,  $J = 7.6$  Hz, 1H), 3.85 – 3.76 (m, 4H), 3.71 – 3.65 (m, 2H), 3.44 – 3.38 (m, 2H);  $^{13}\text{C}$  NMR (126 MHz,  $\text{CDCl}_3$ )  $\delta$  196.05, 163.55, 163.34, 138.22, 132.01, 119.96, 118.70, 116.79, 66.66 (d,  $J = 10.4$  Hz), 46.39, 41.66.

### 11. $^1\text{H}$ NMR, $^{13}\text{C}$ NMR and $^{19}\text{F}$ NMR for the products.

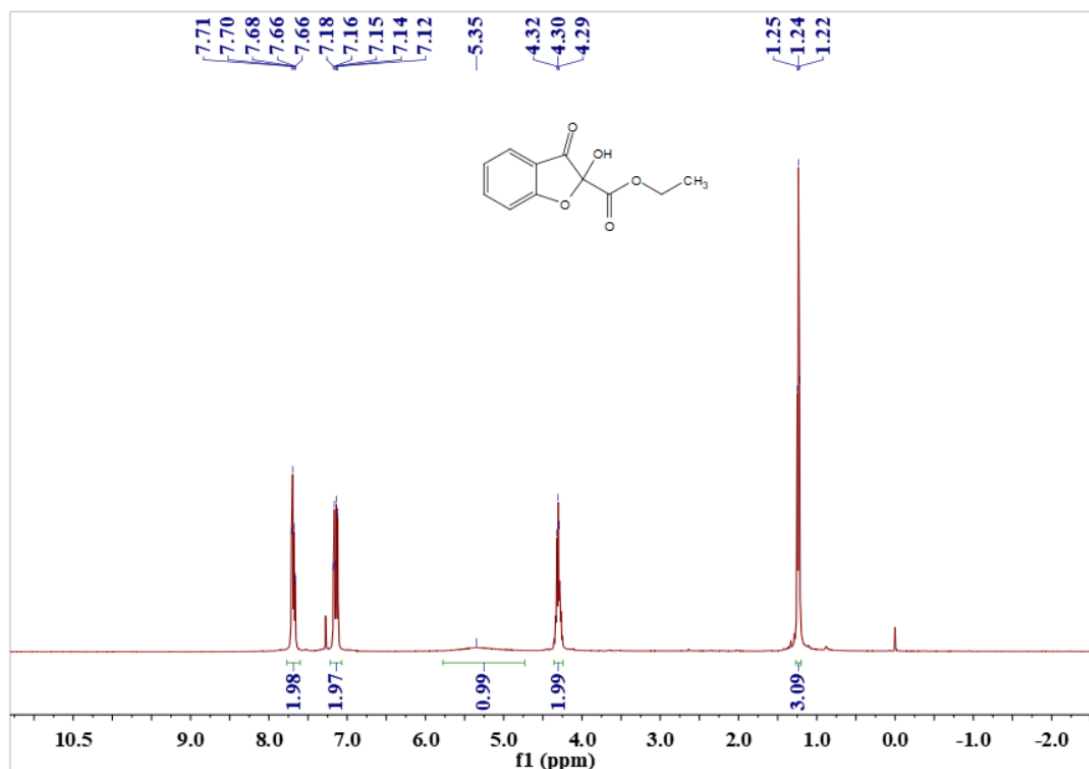

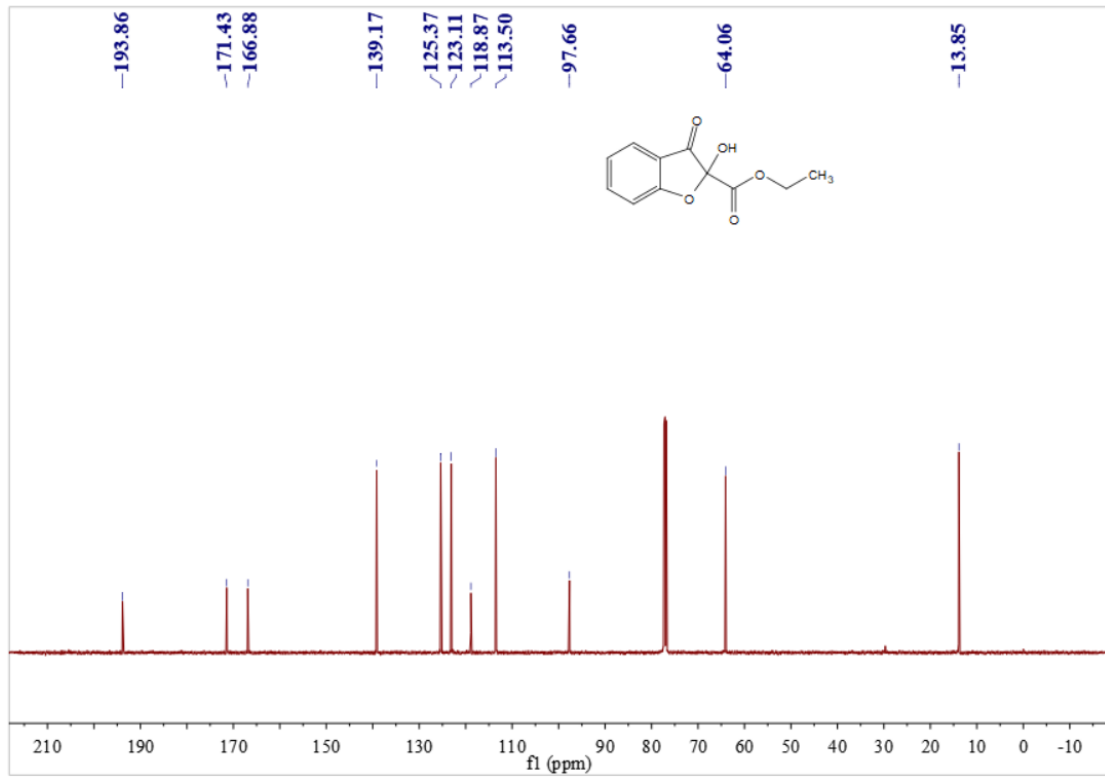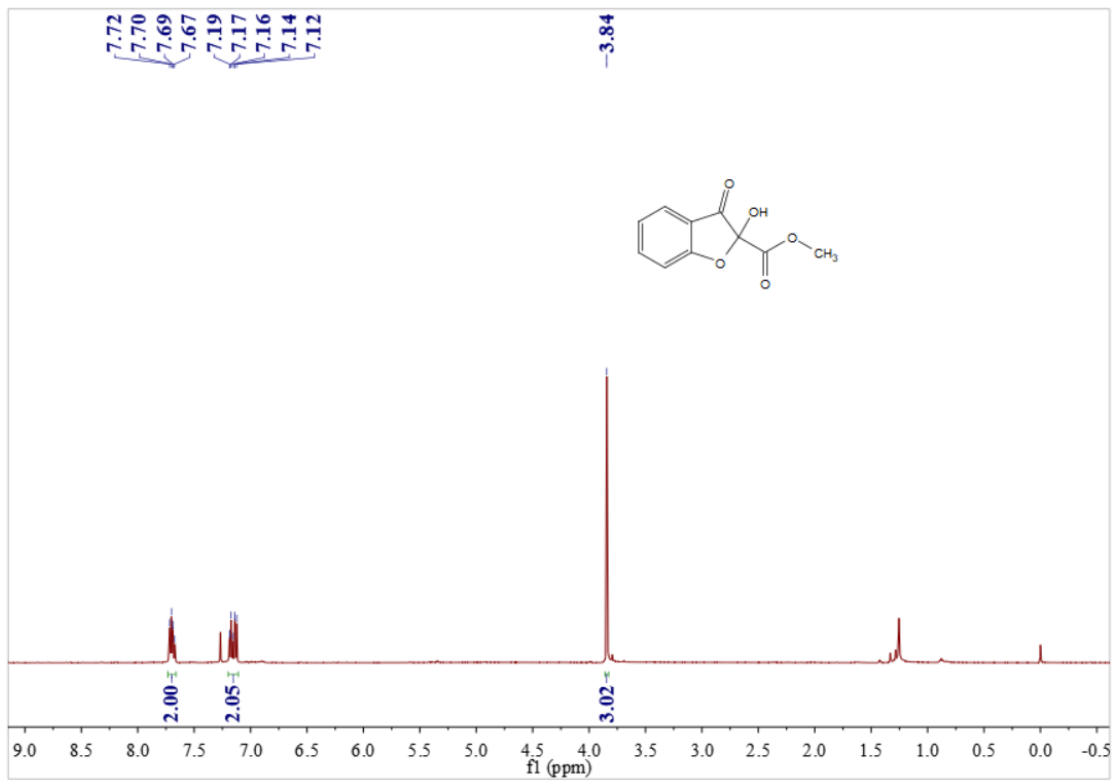

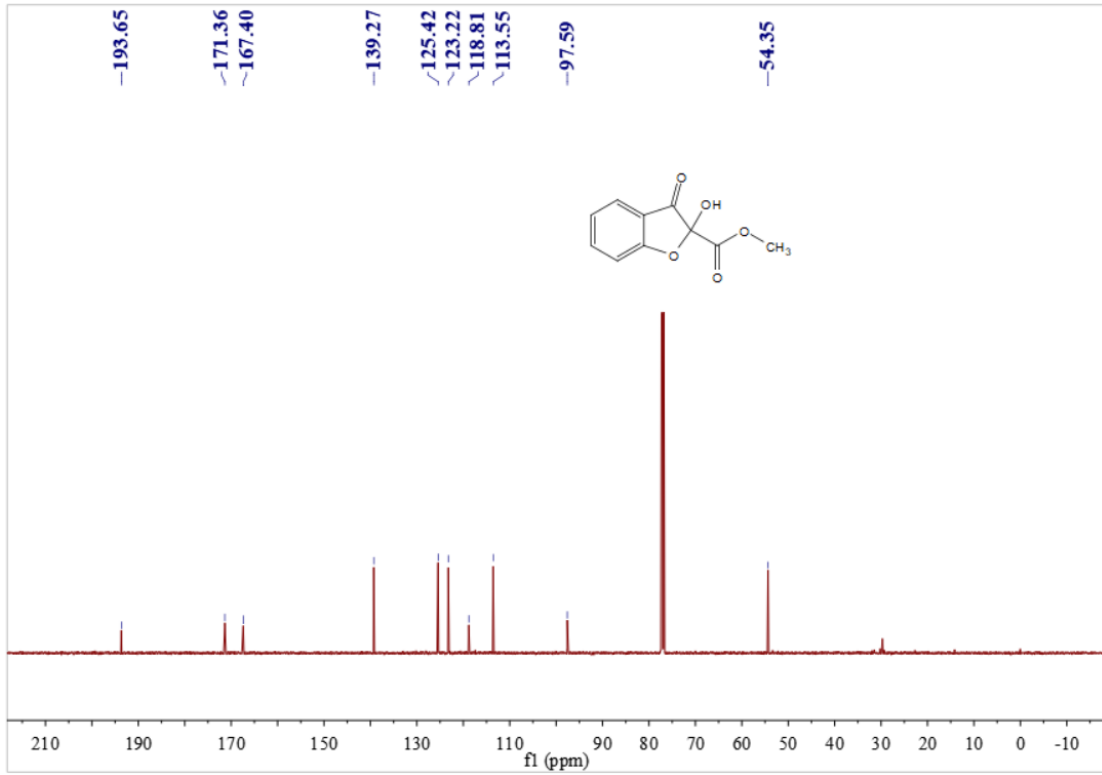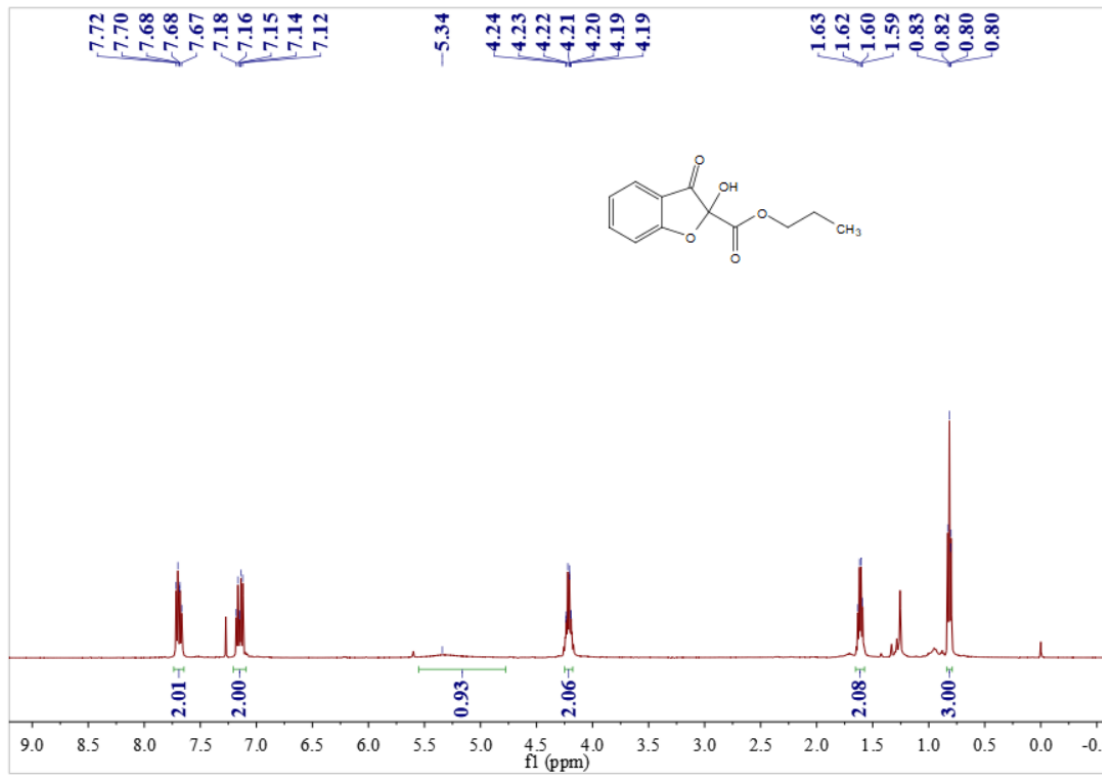

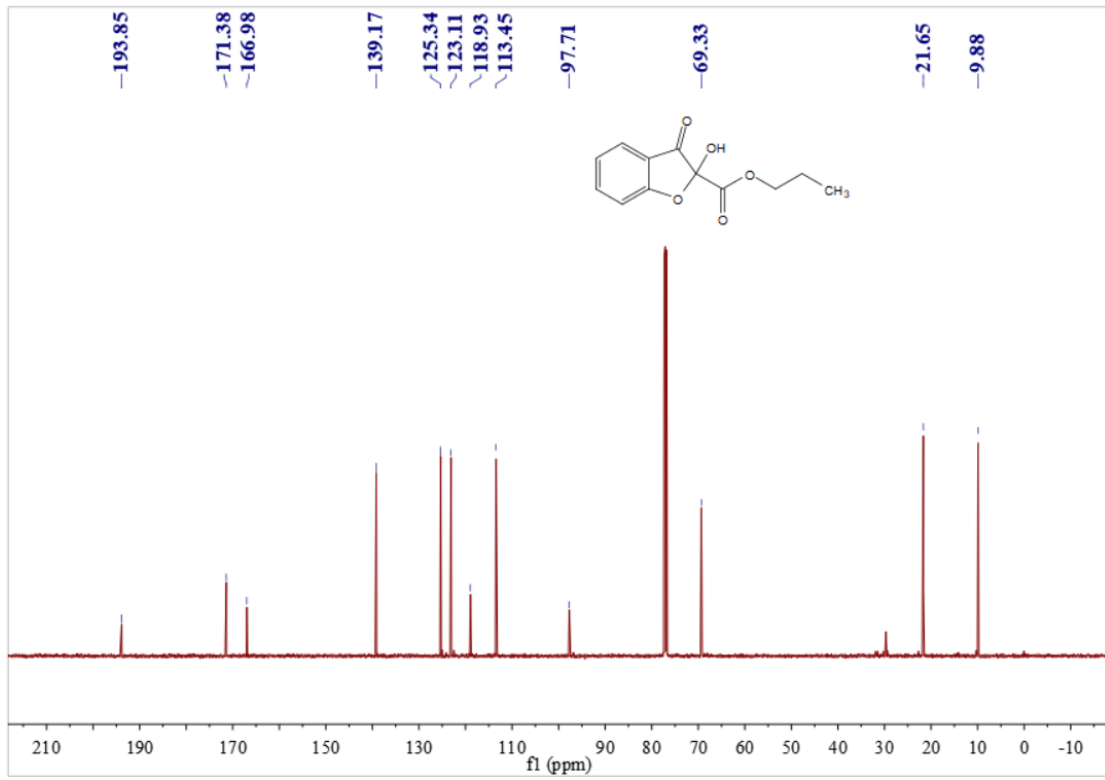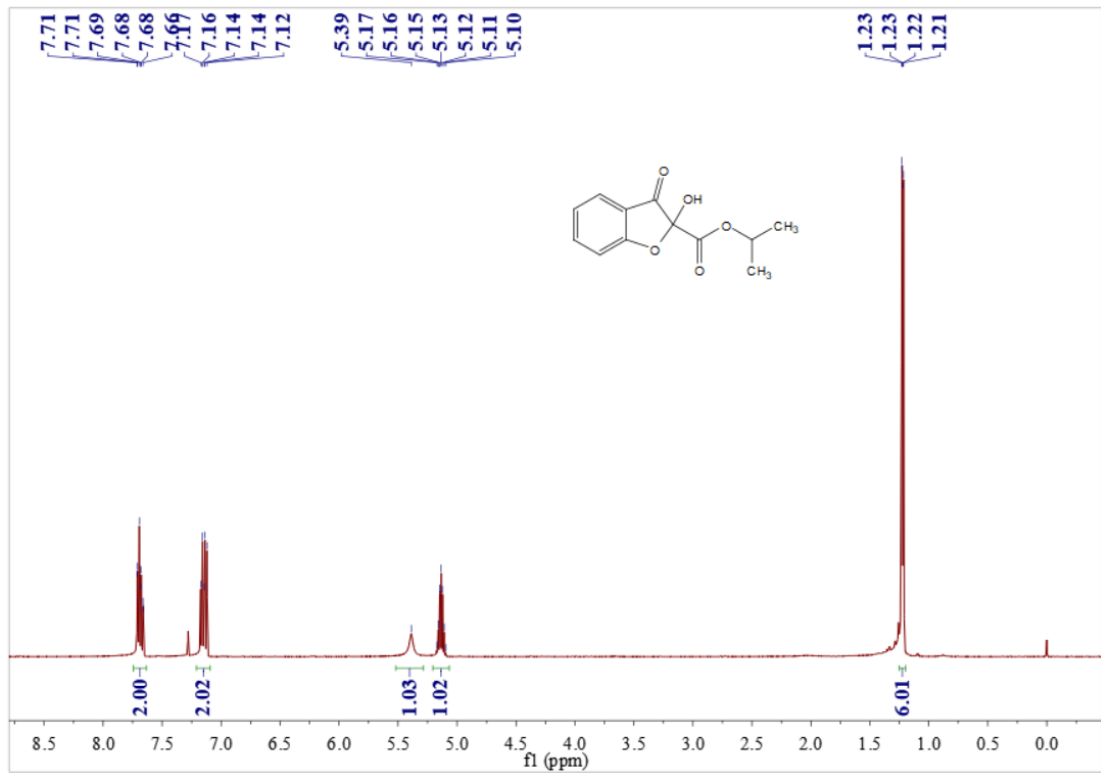

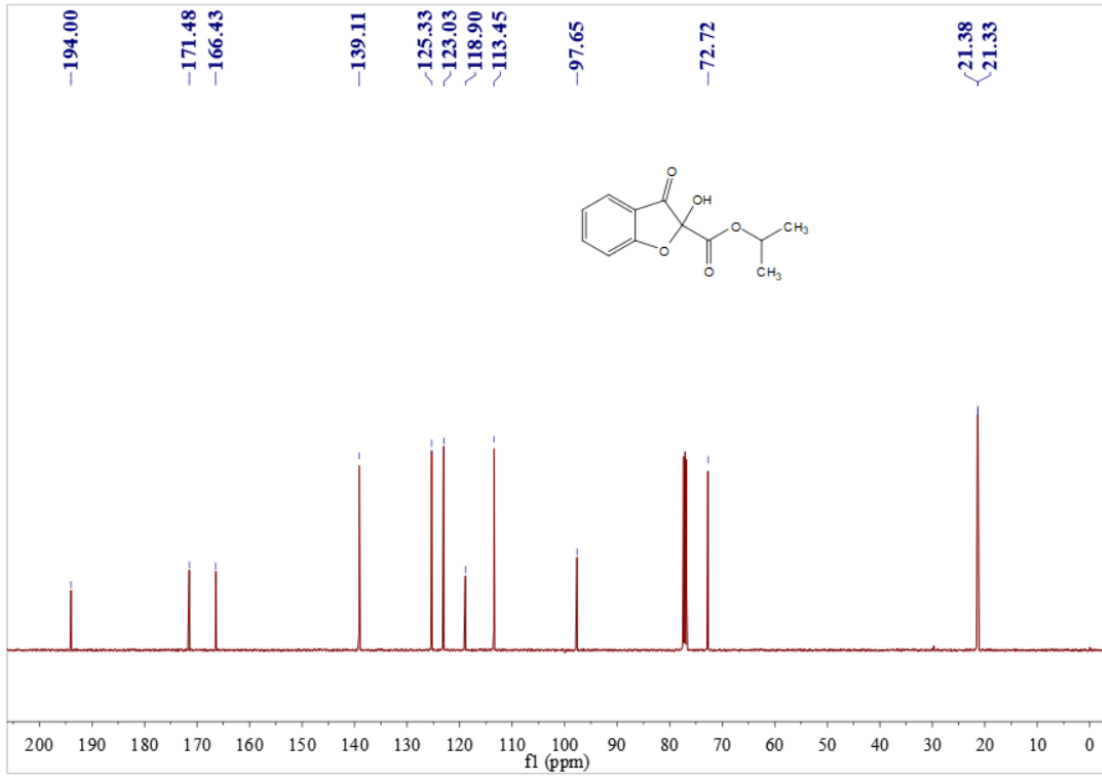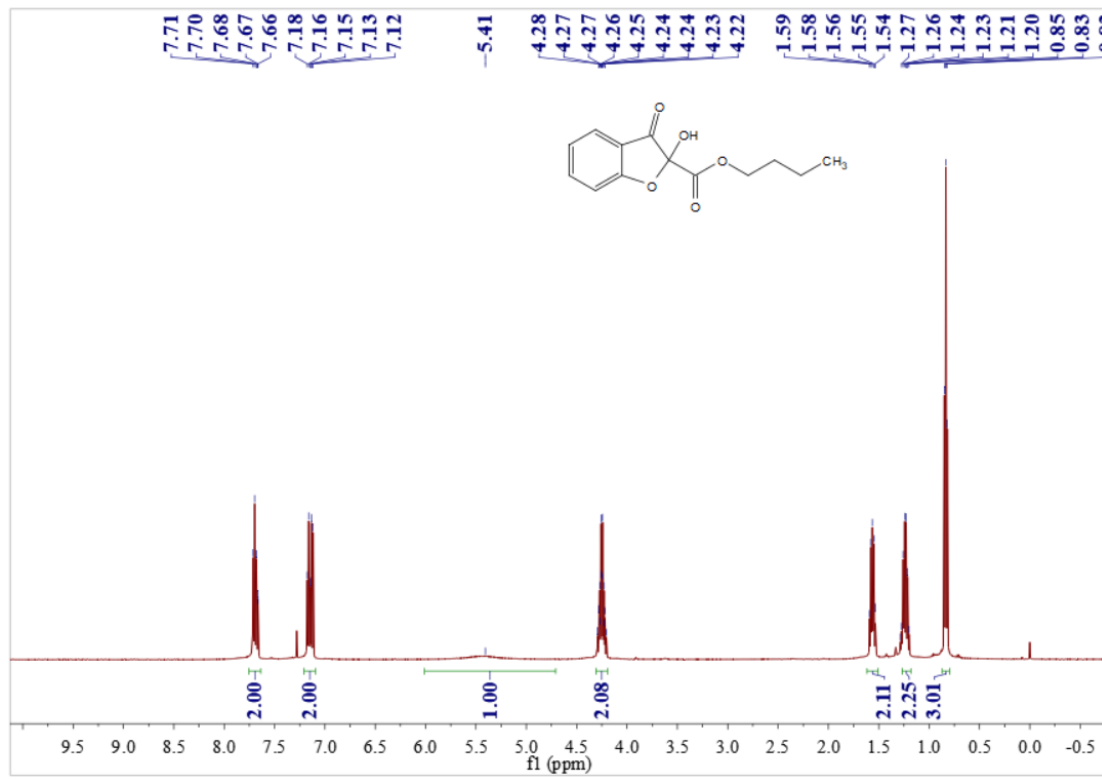

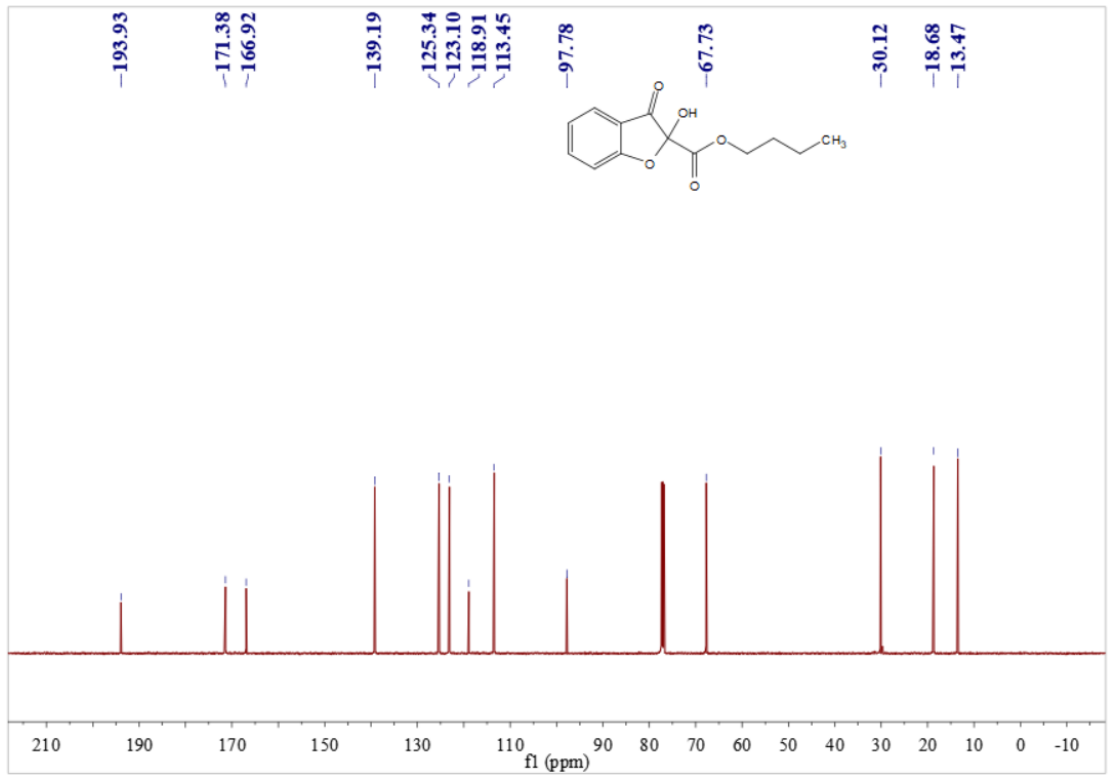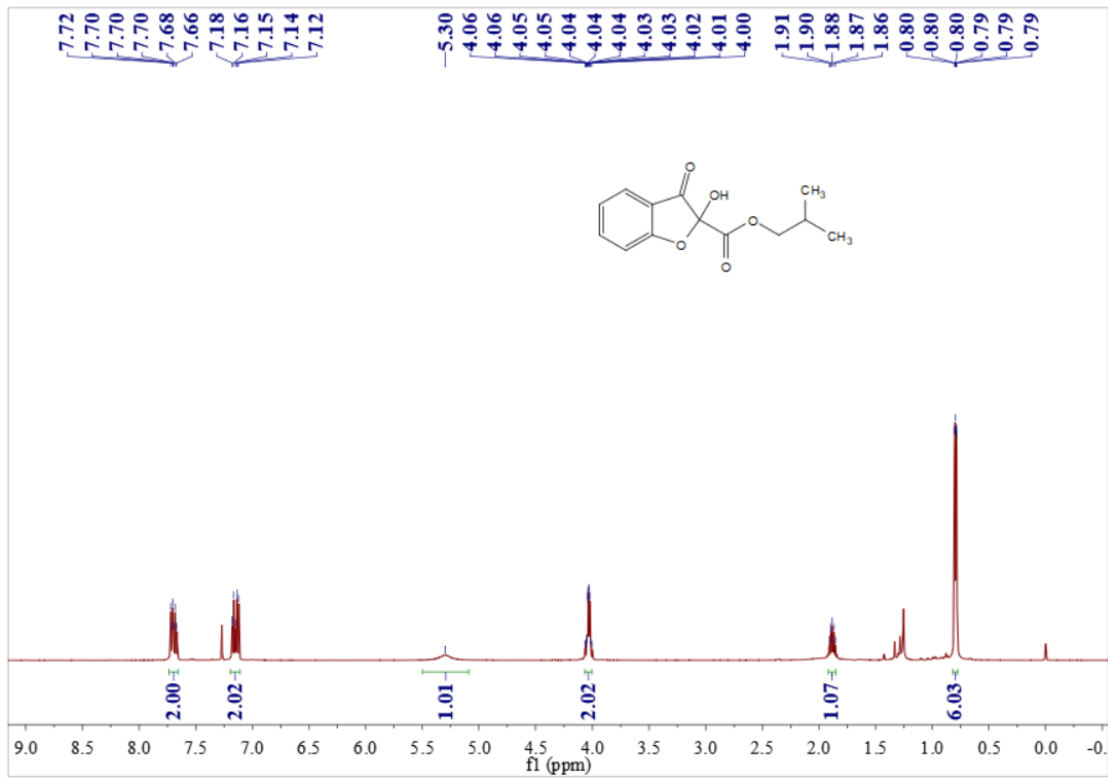

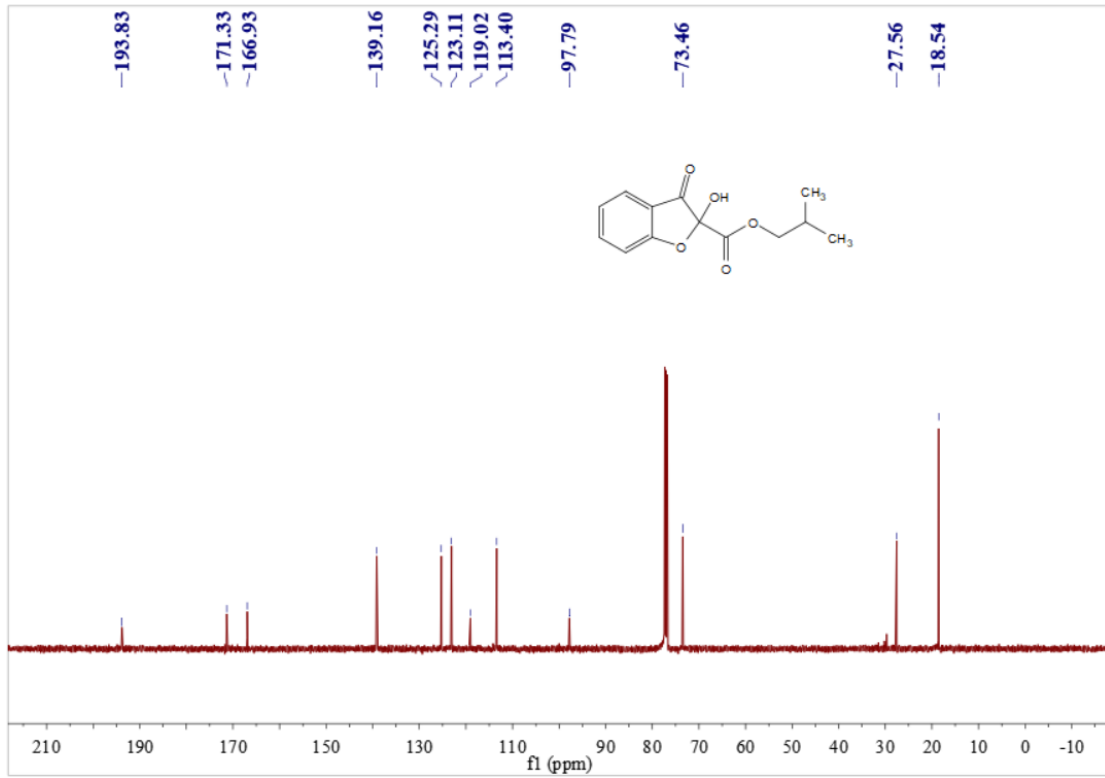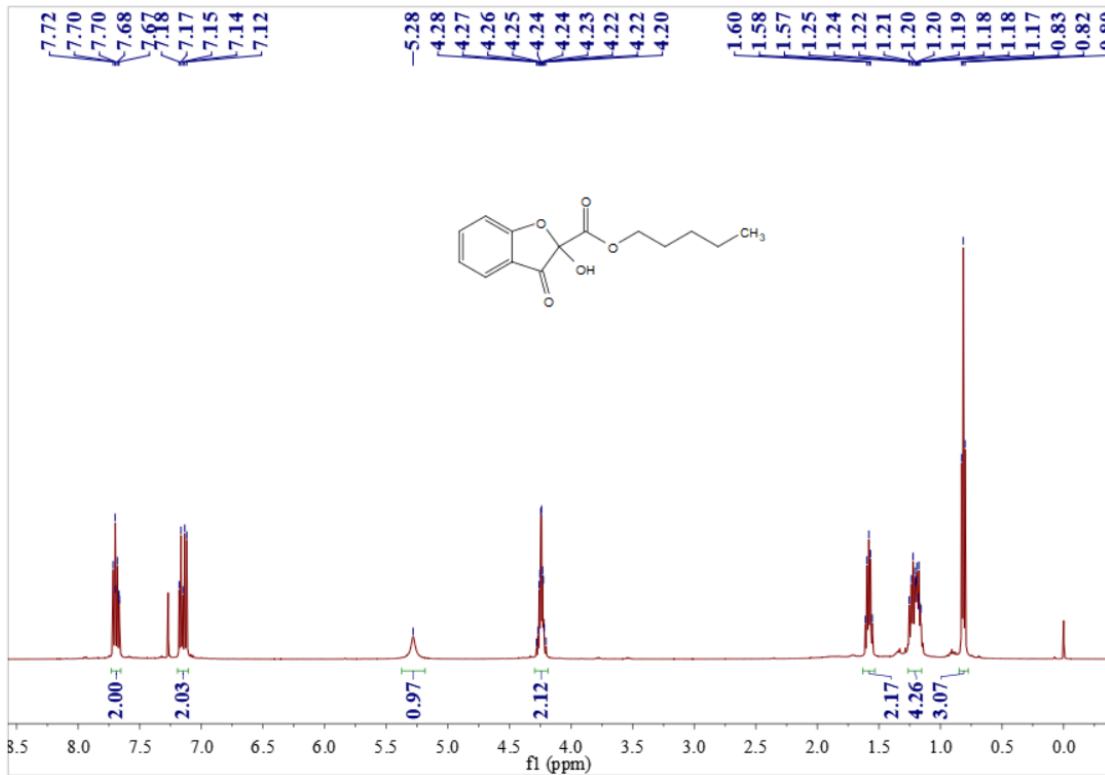

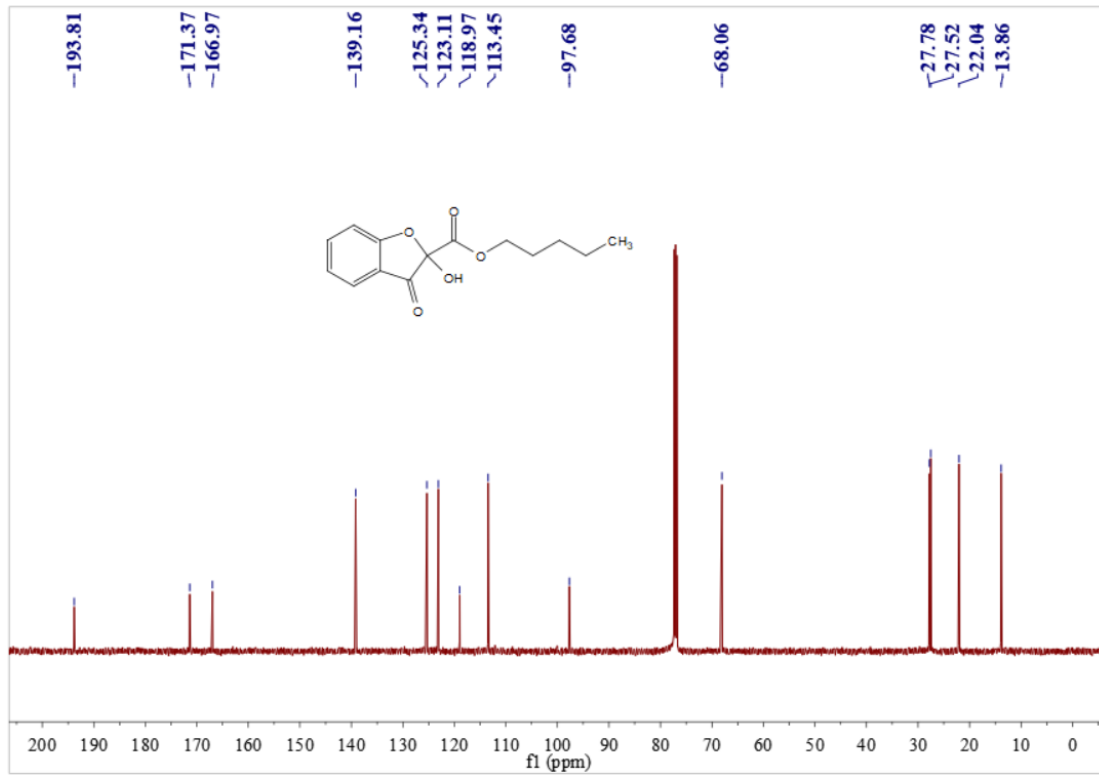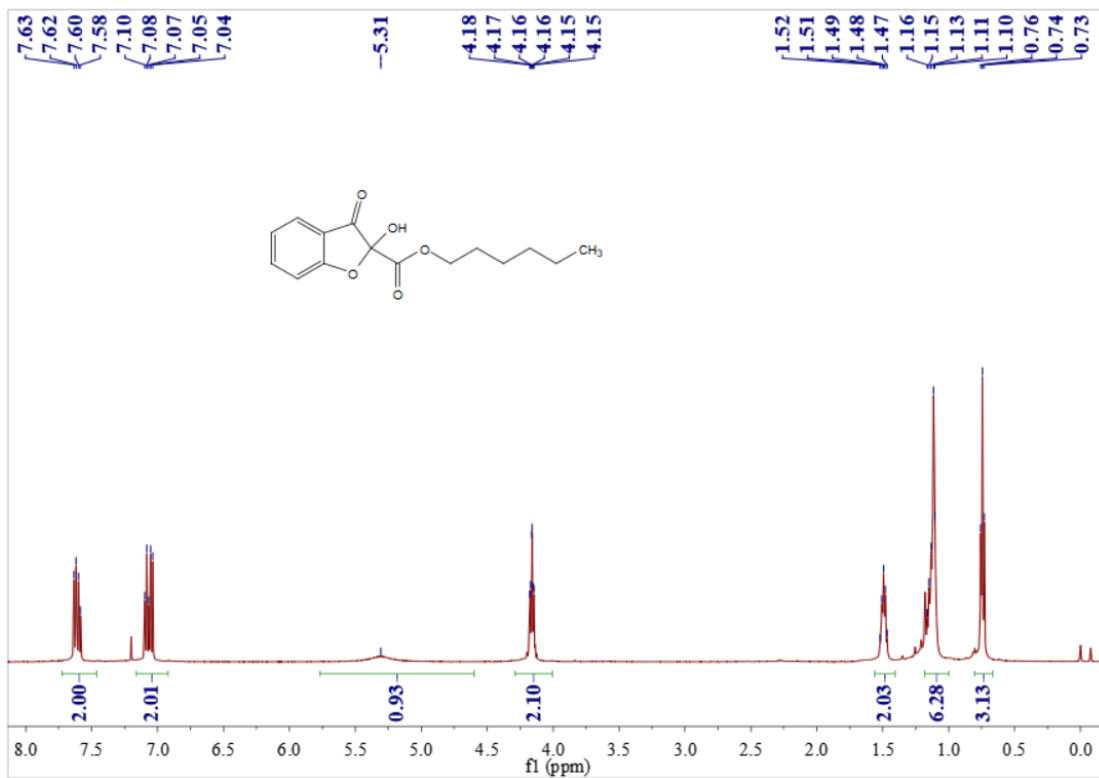



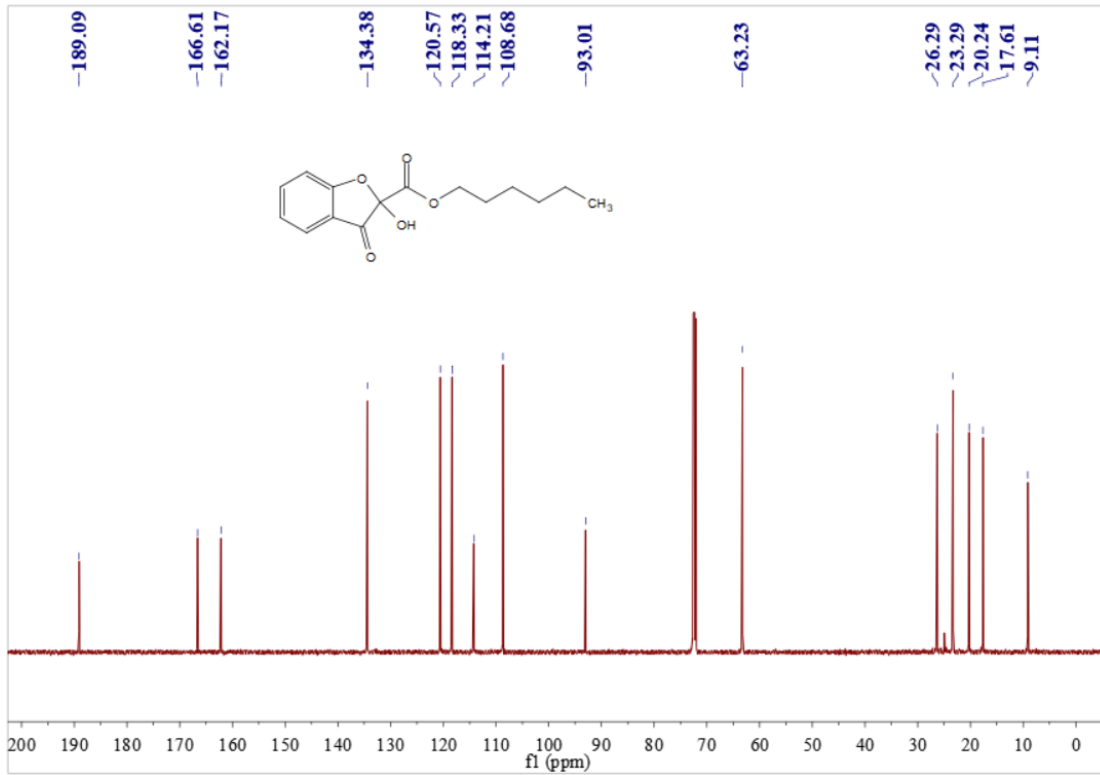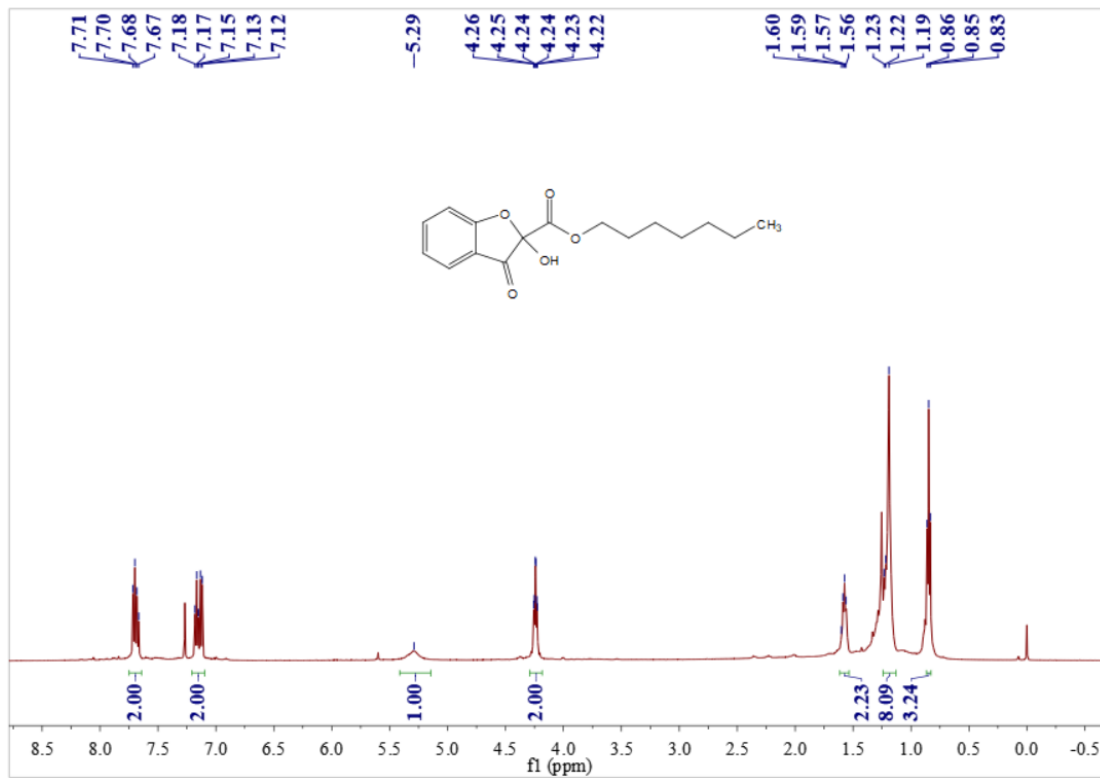

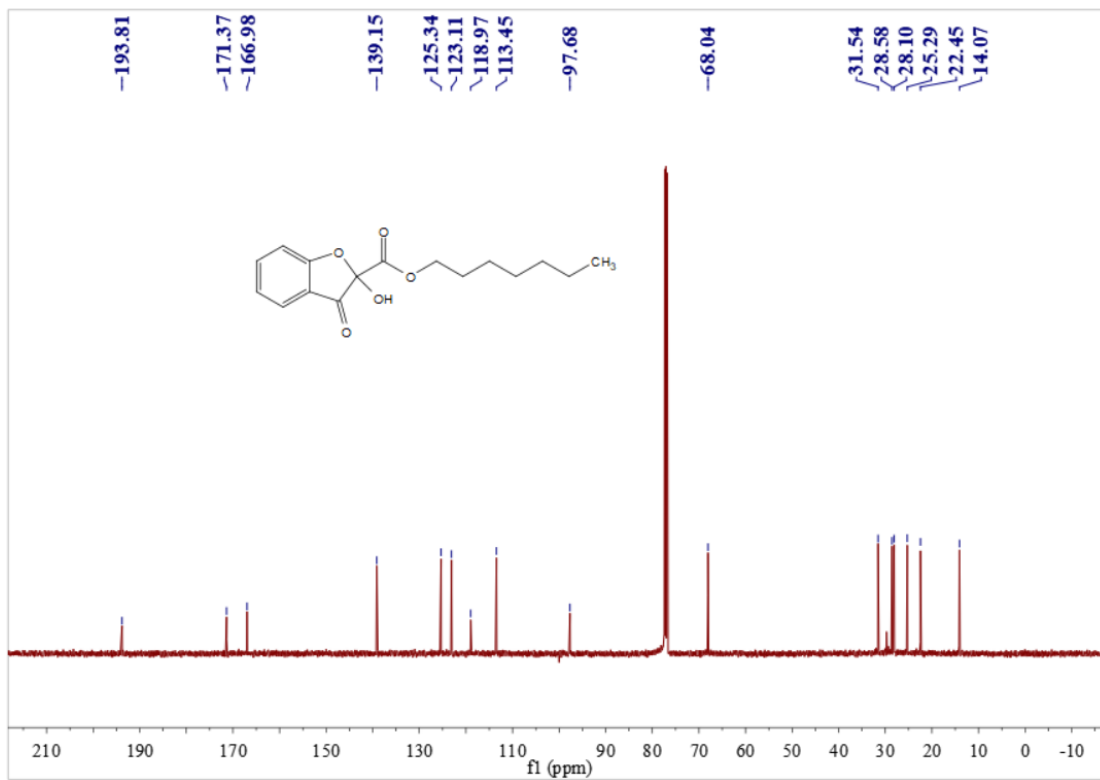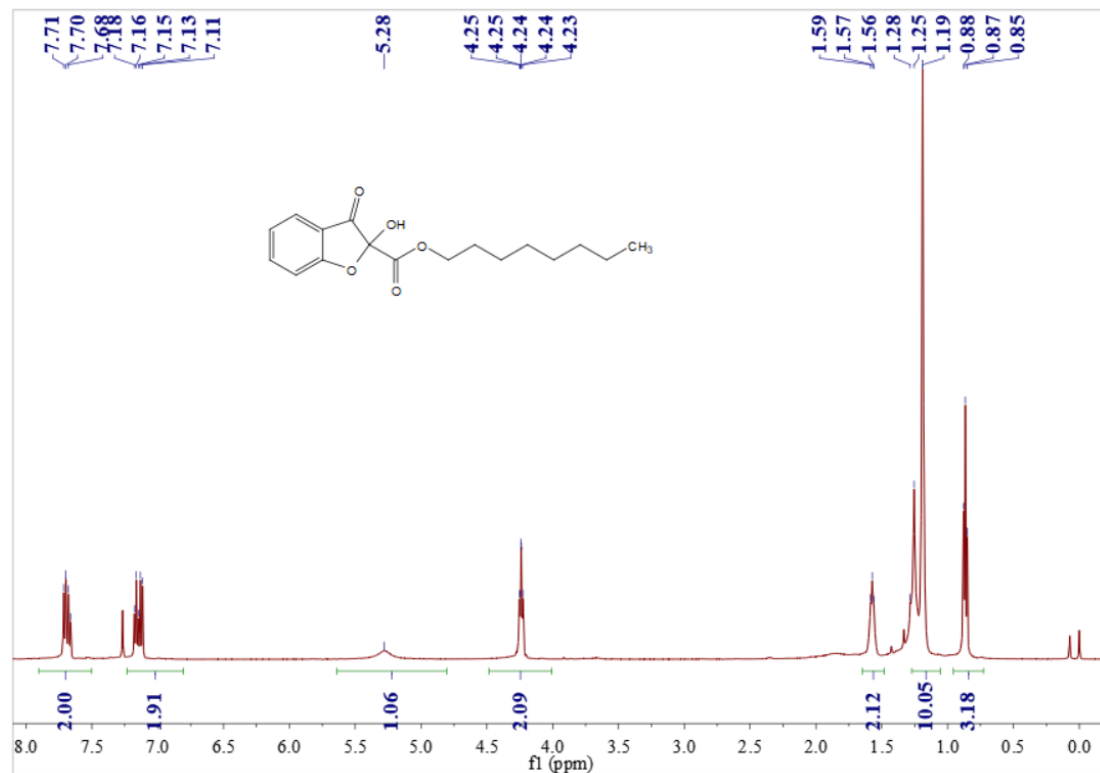

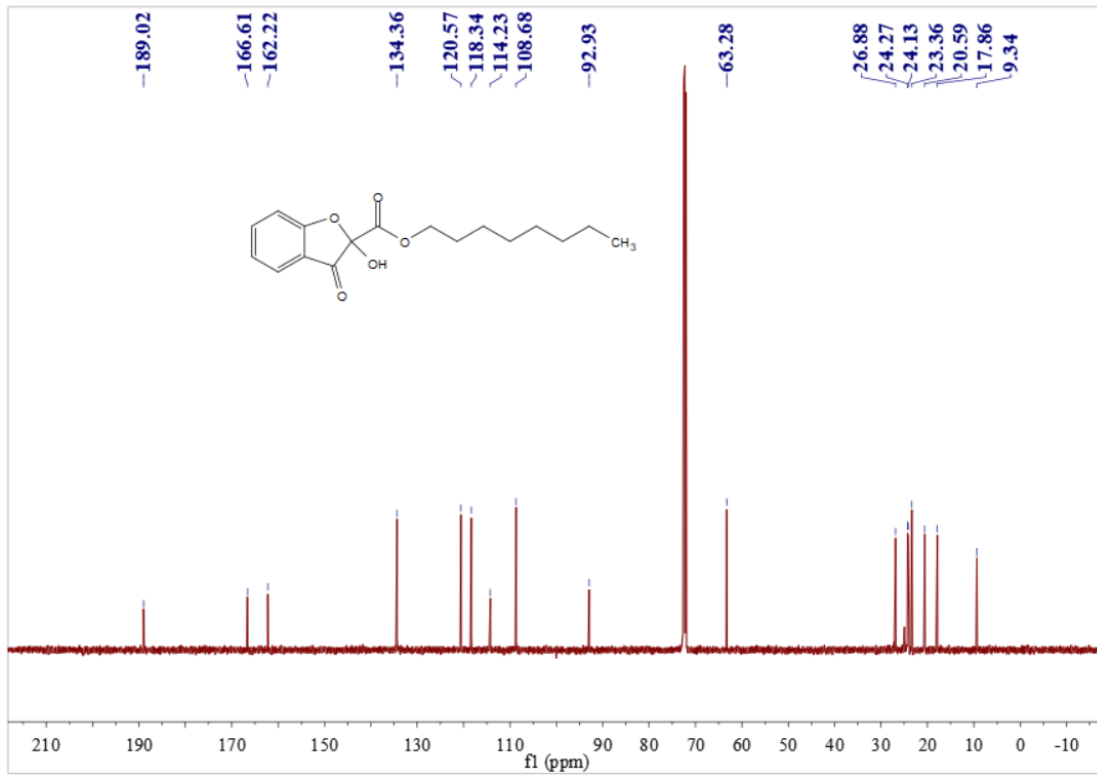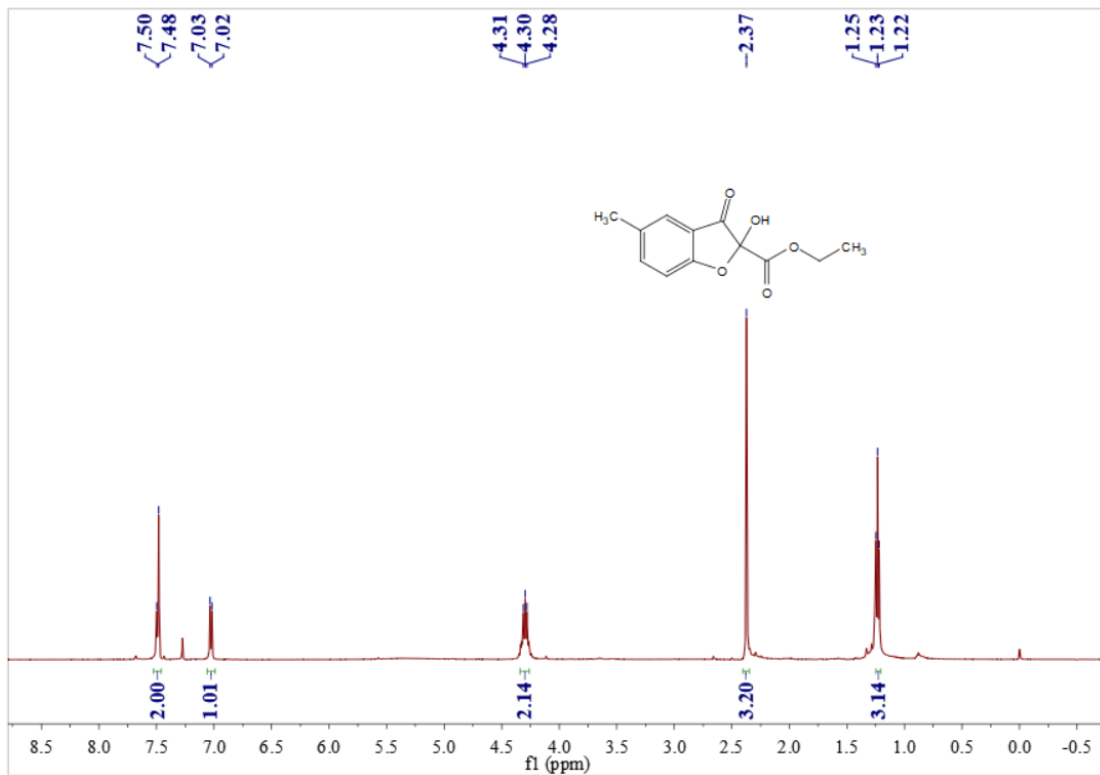

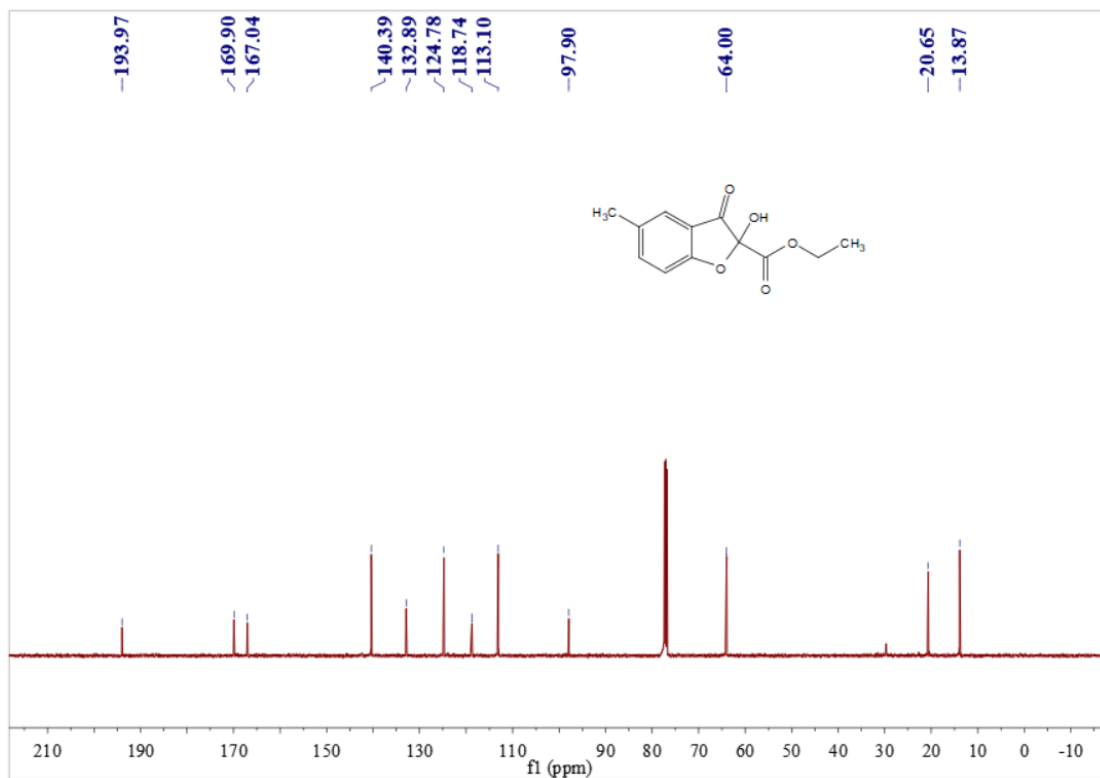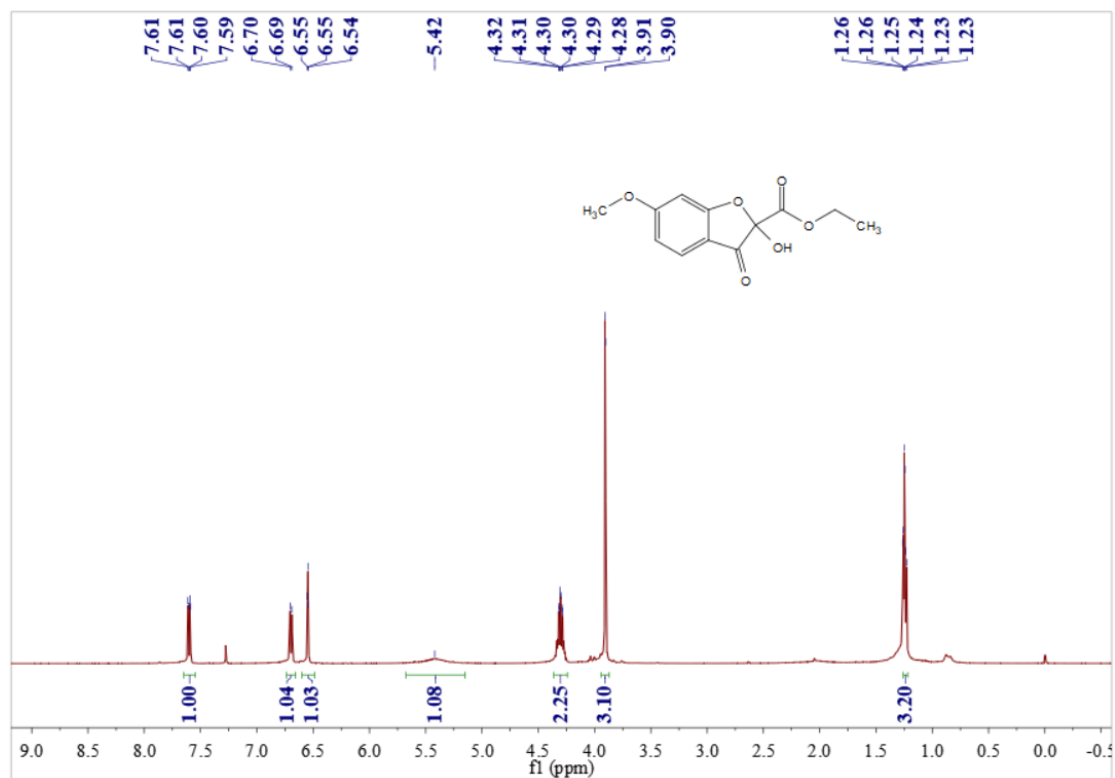

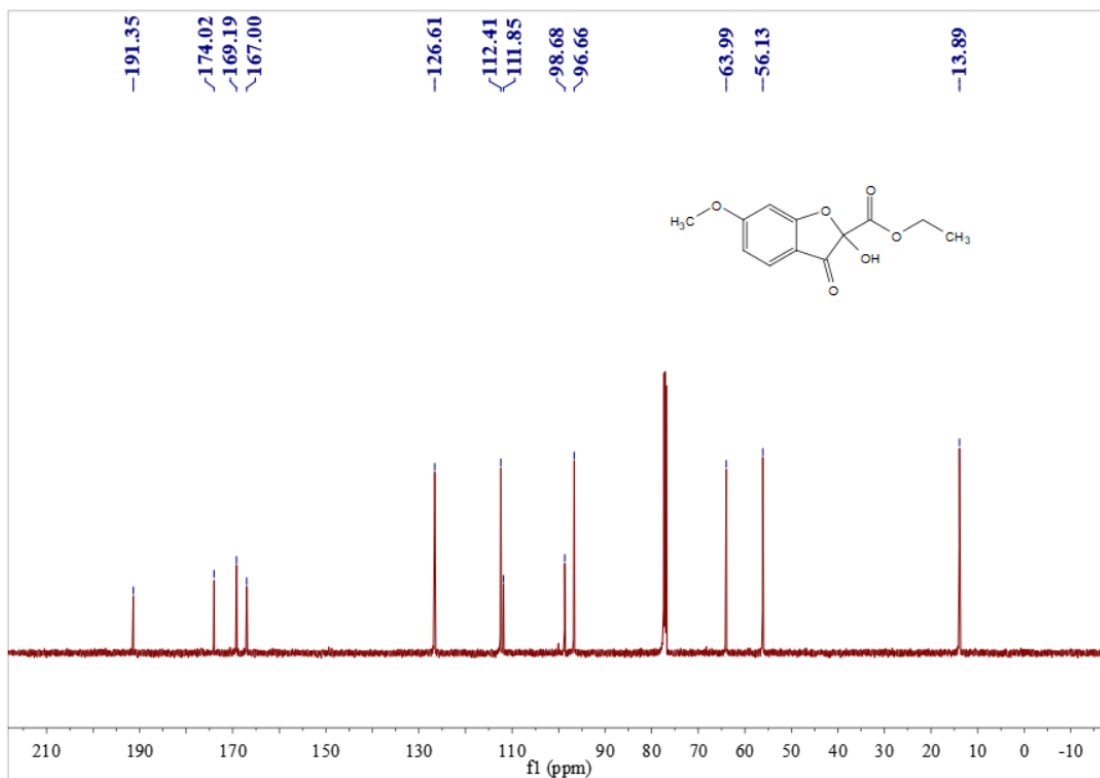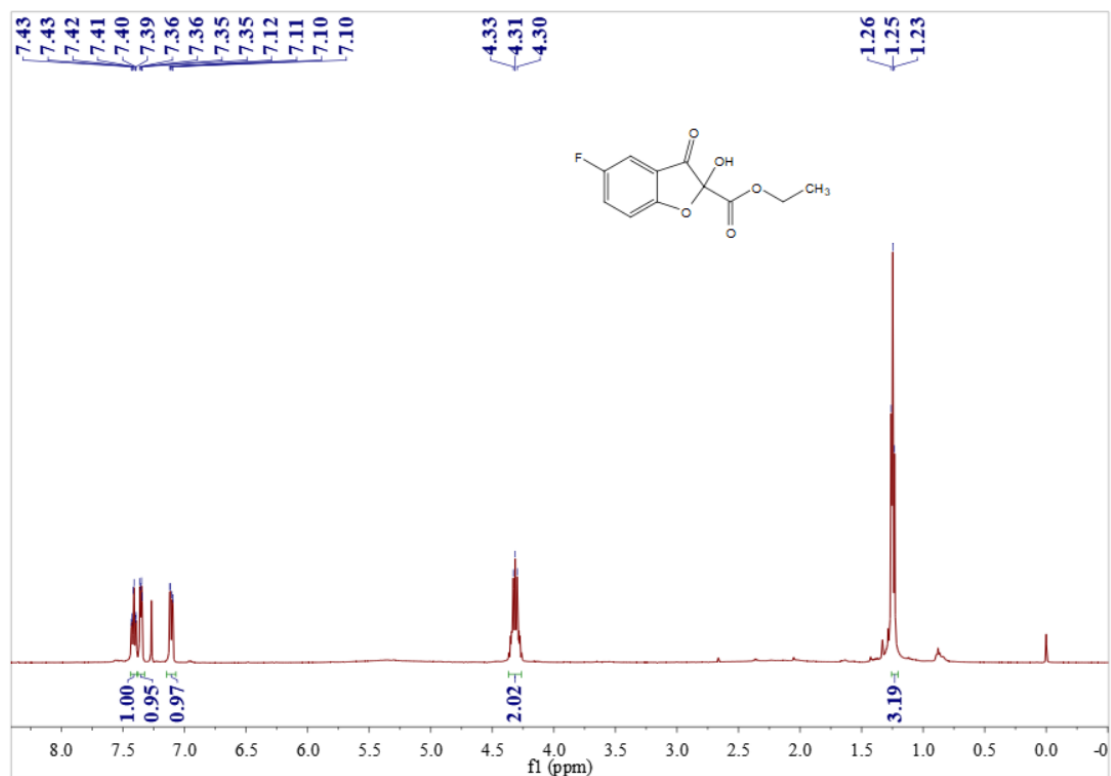

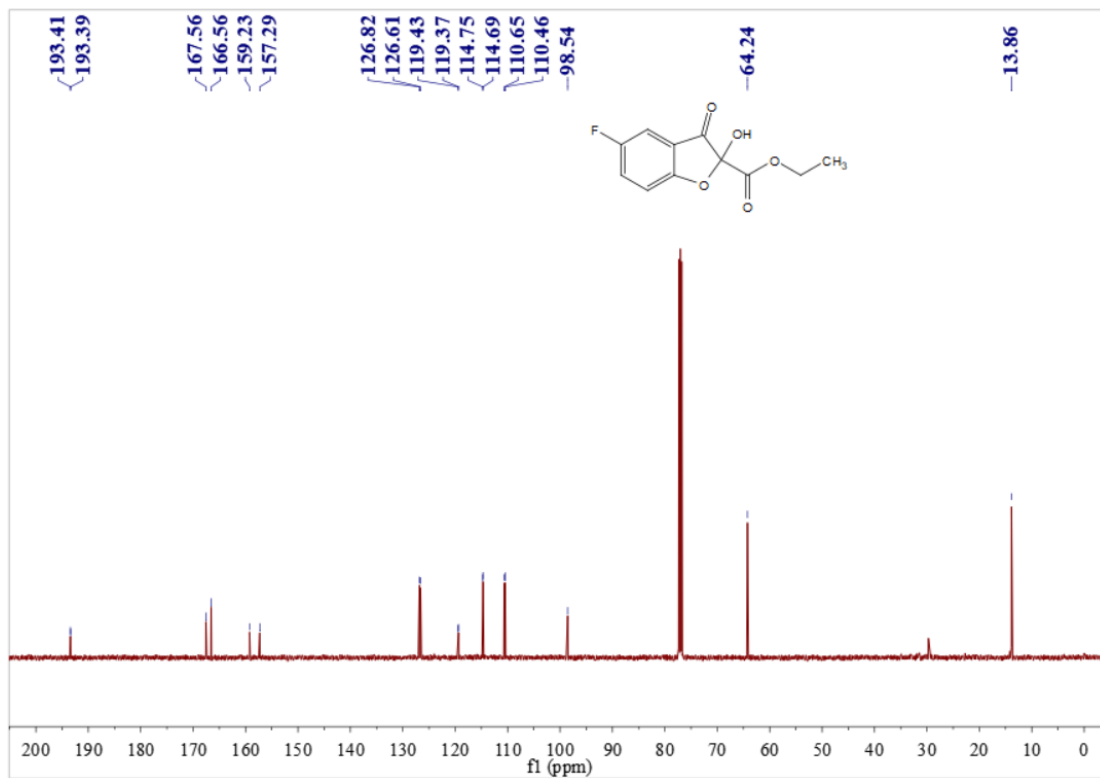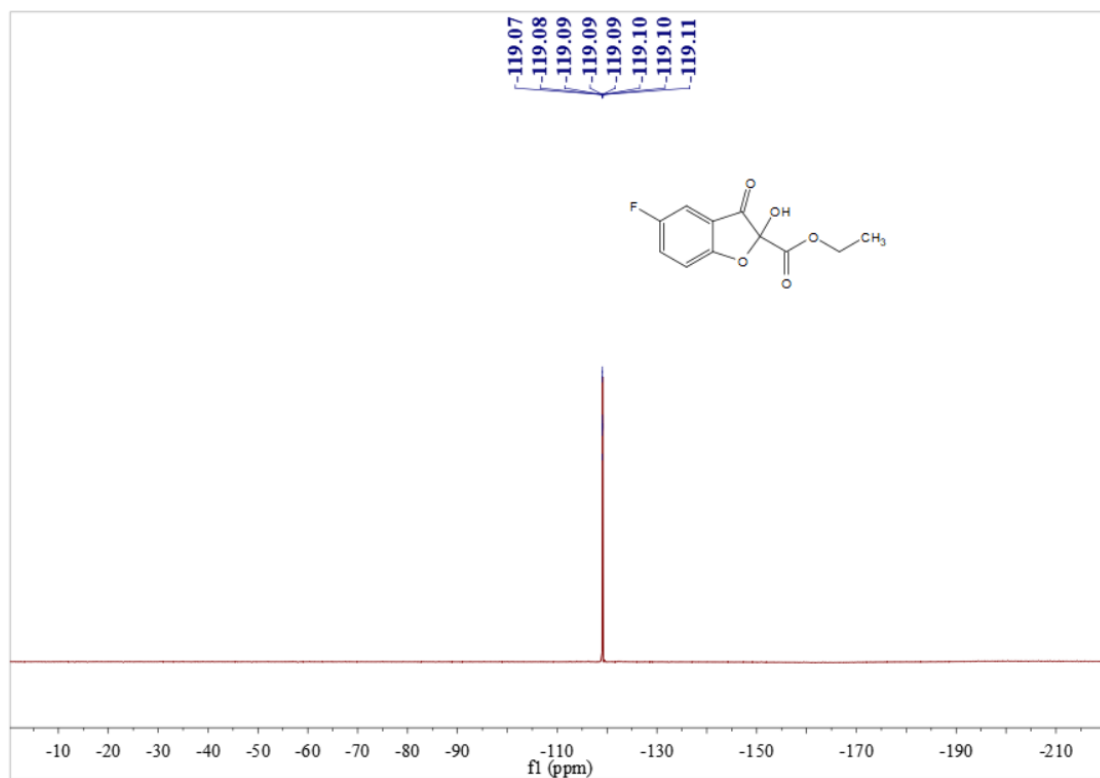

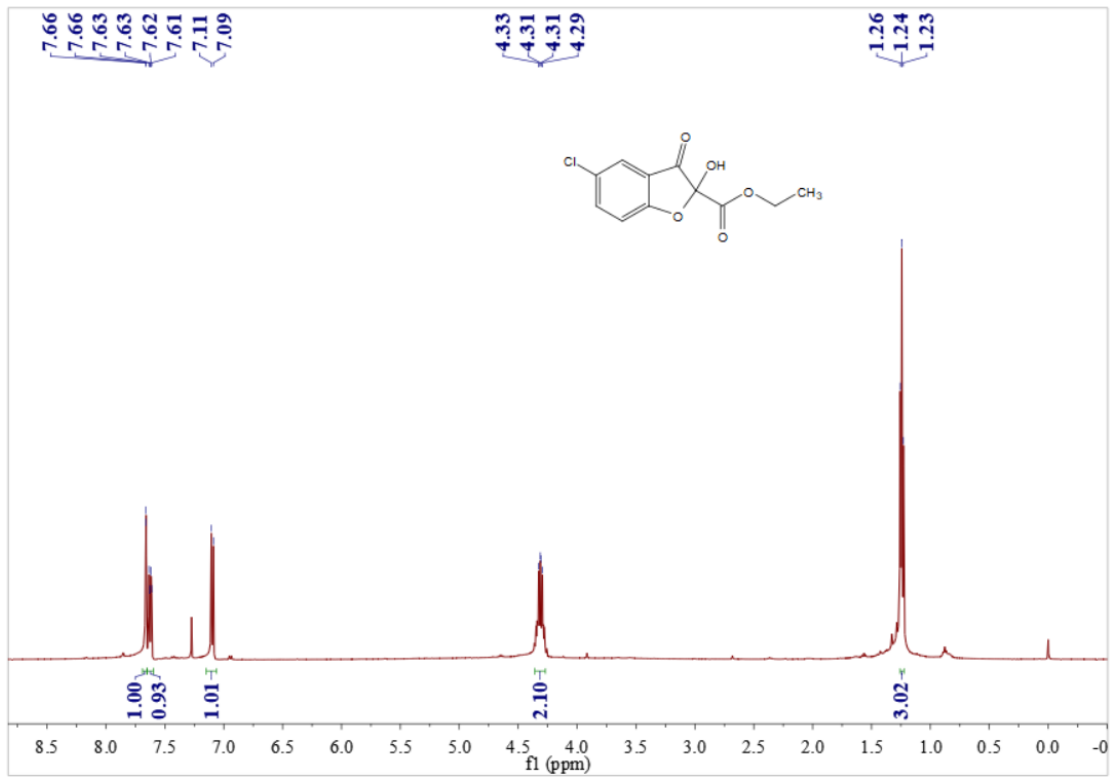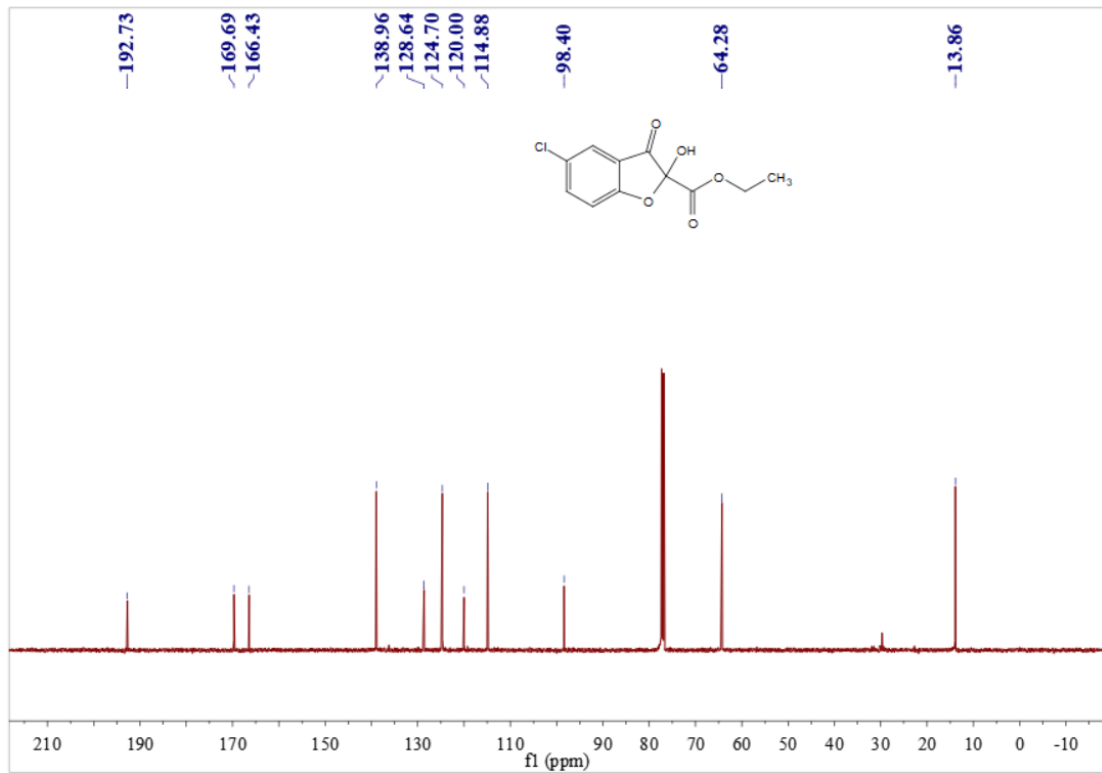

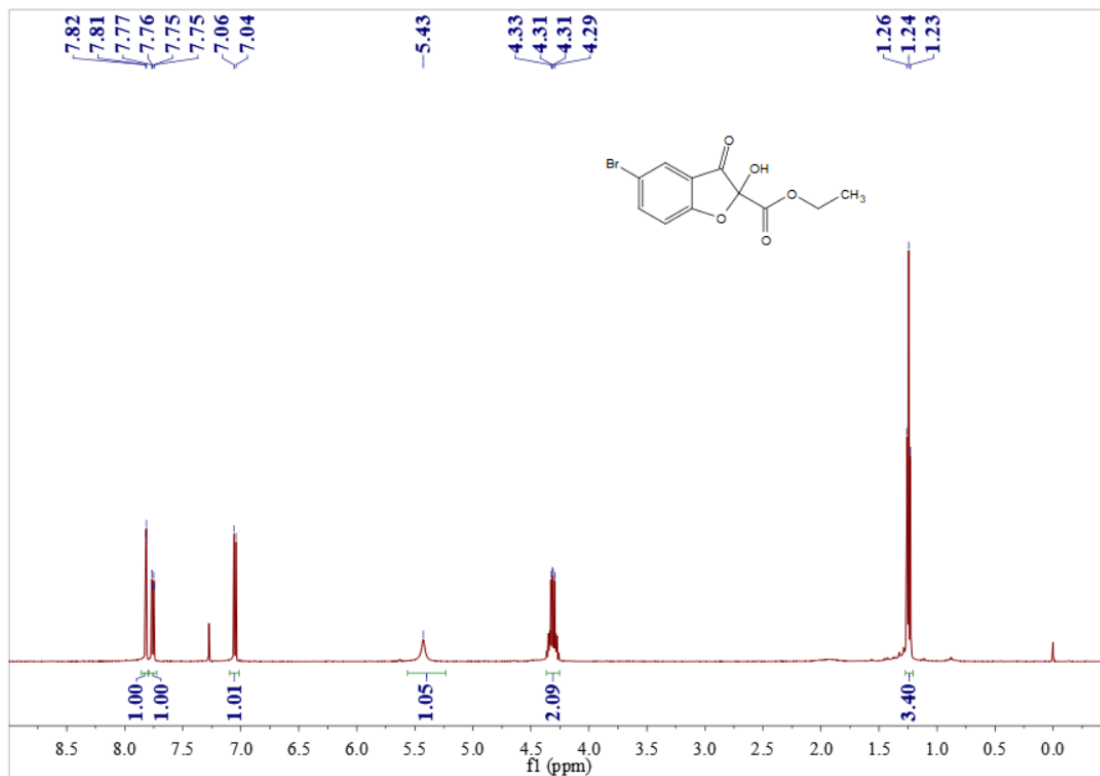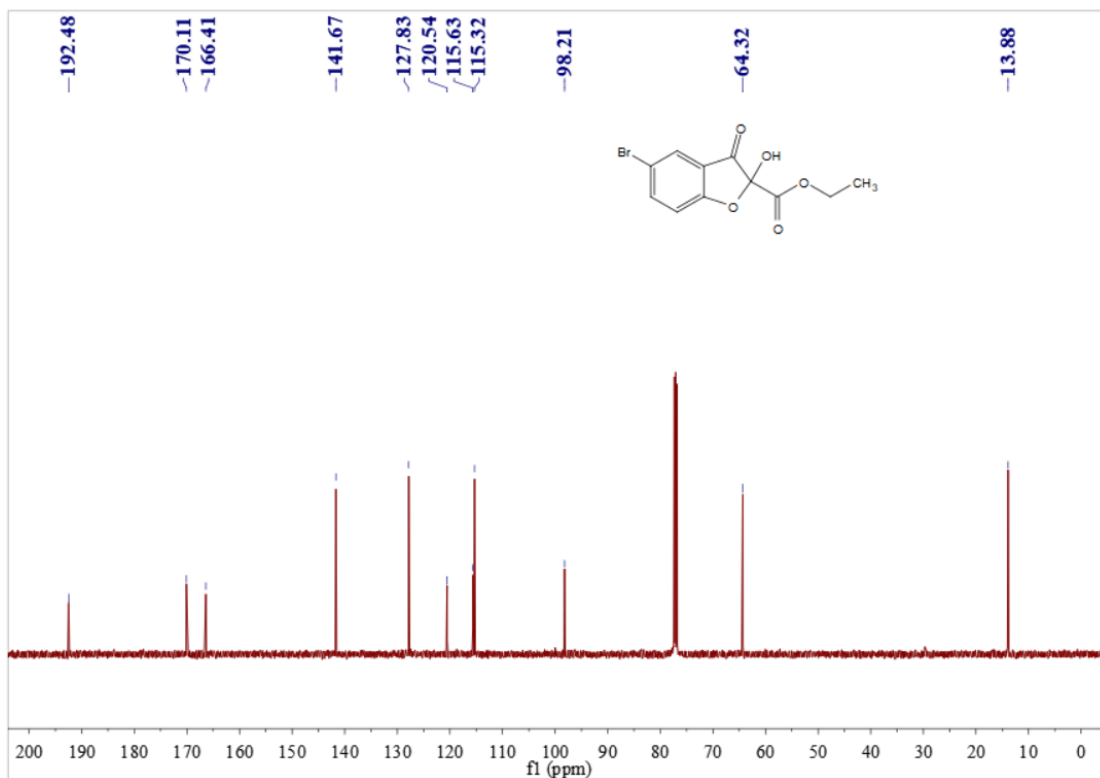



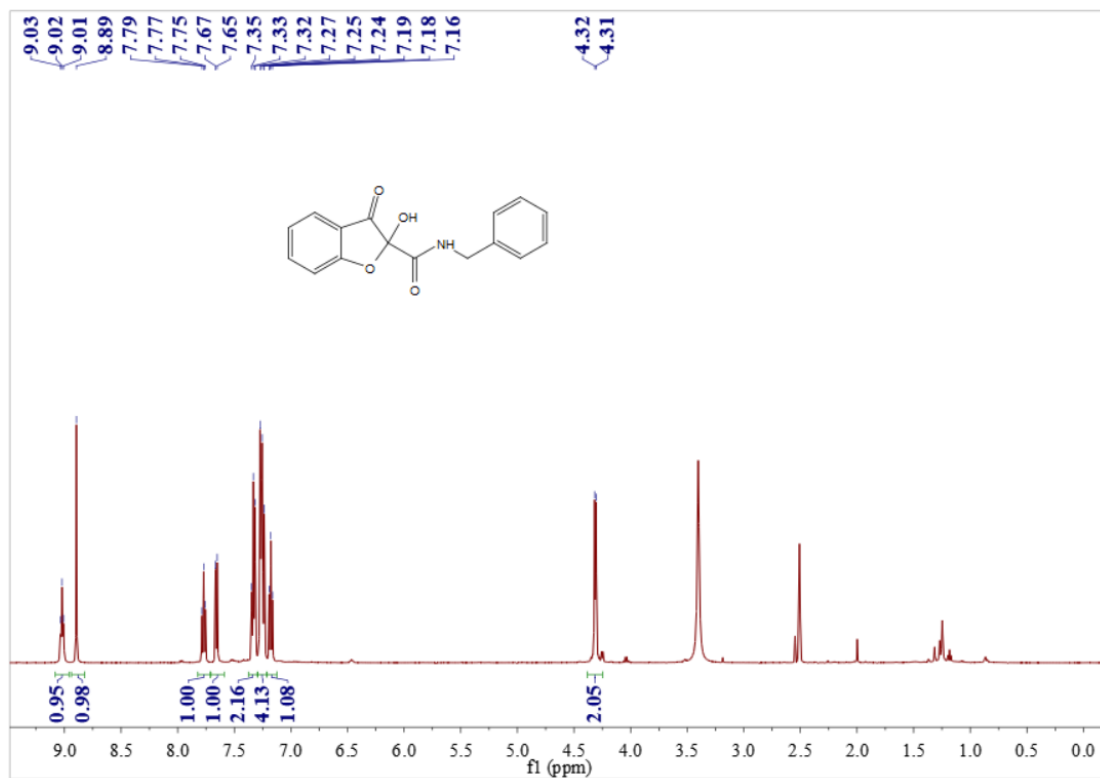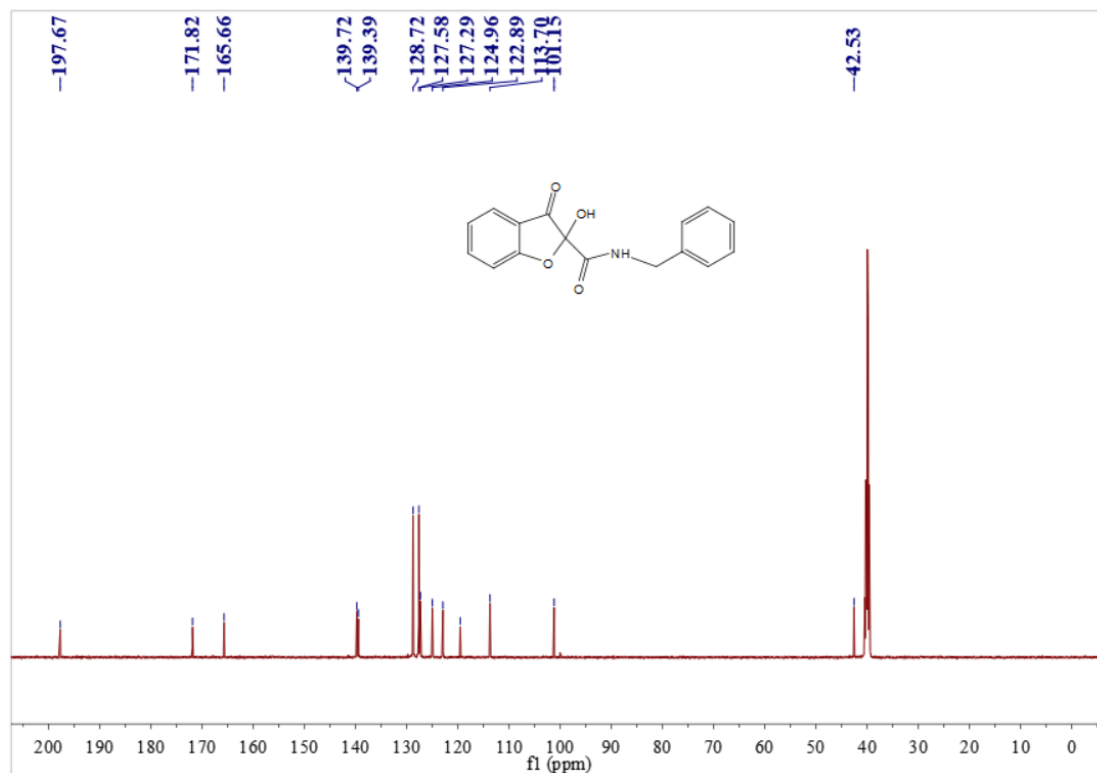

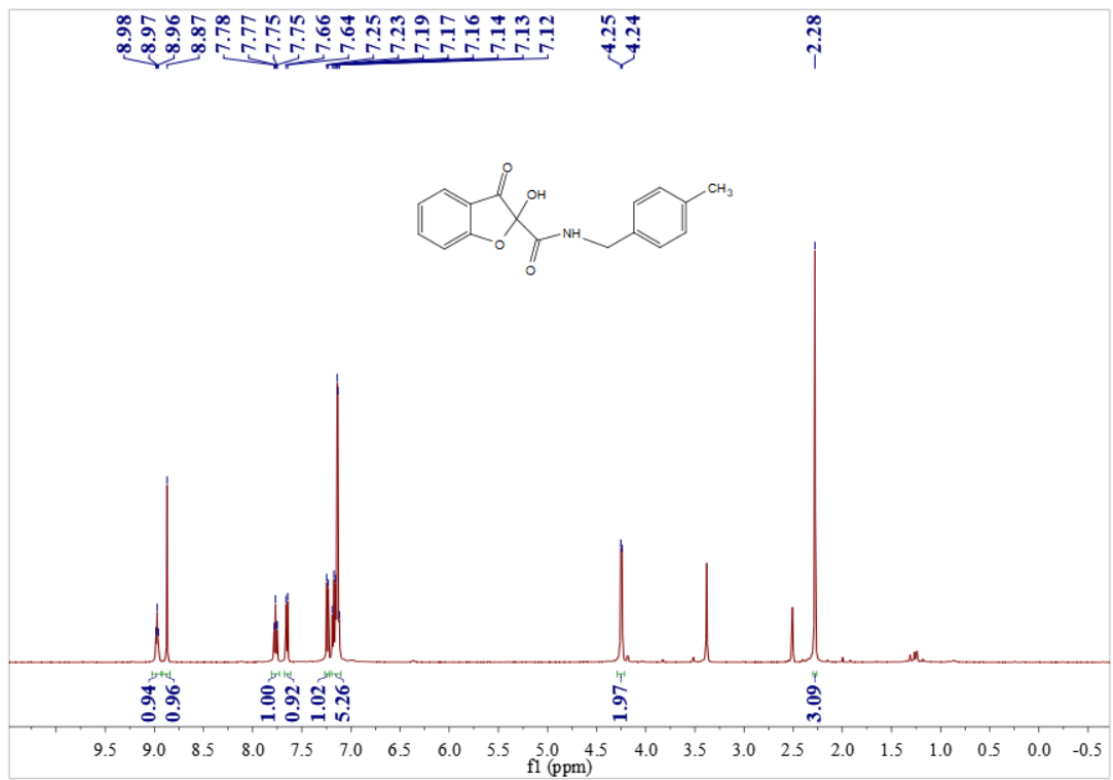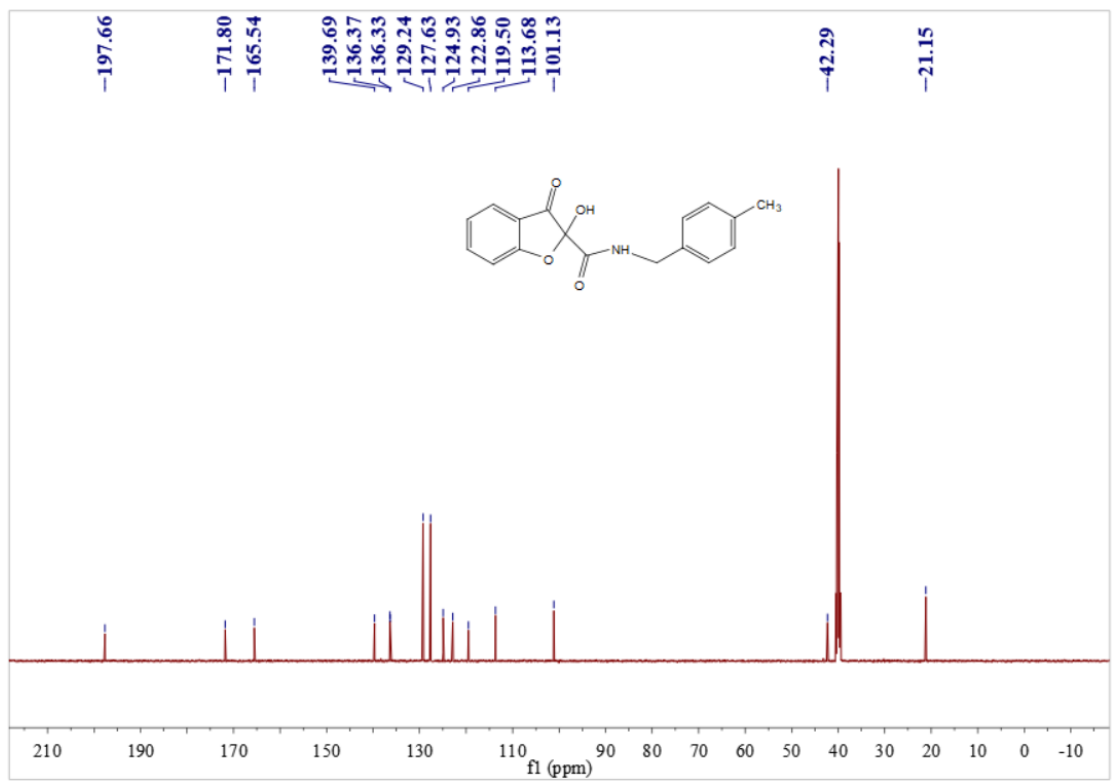

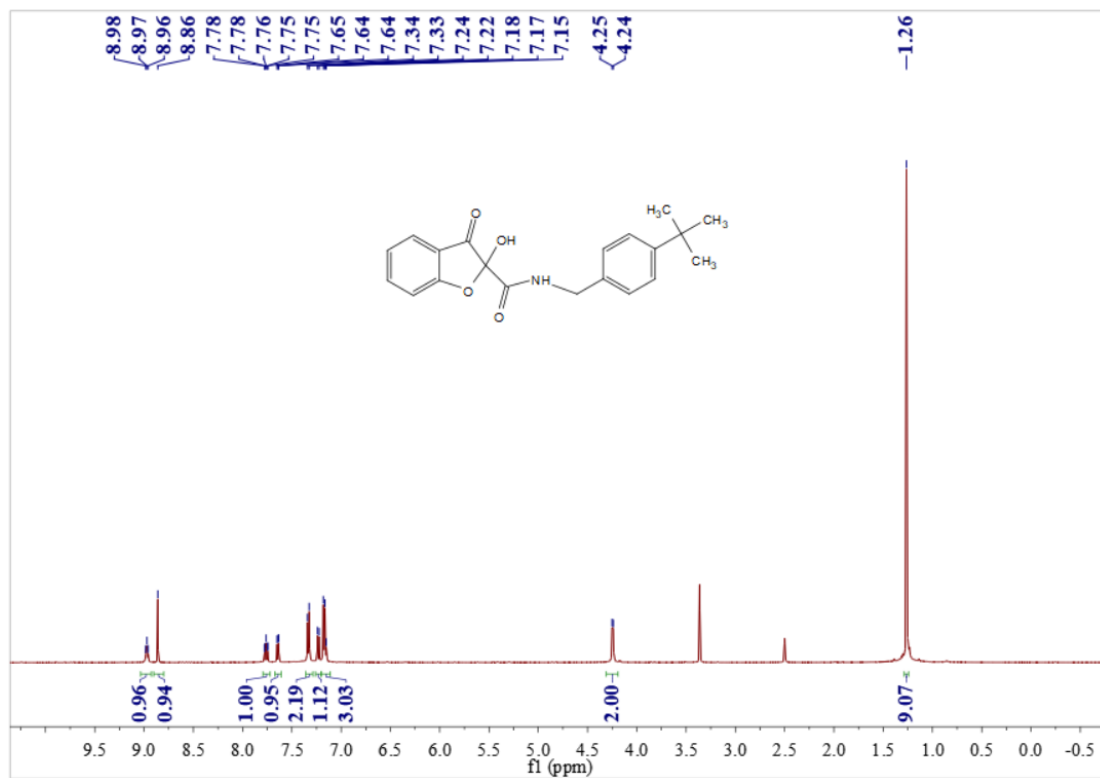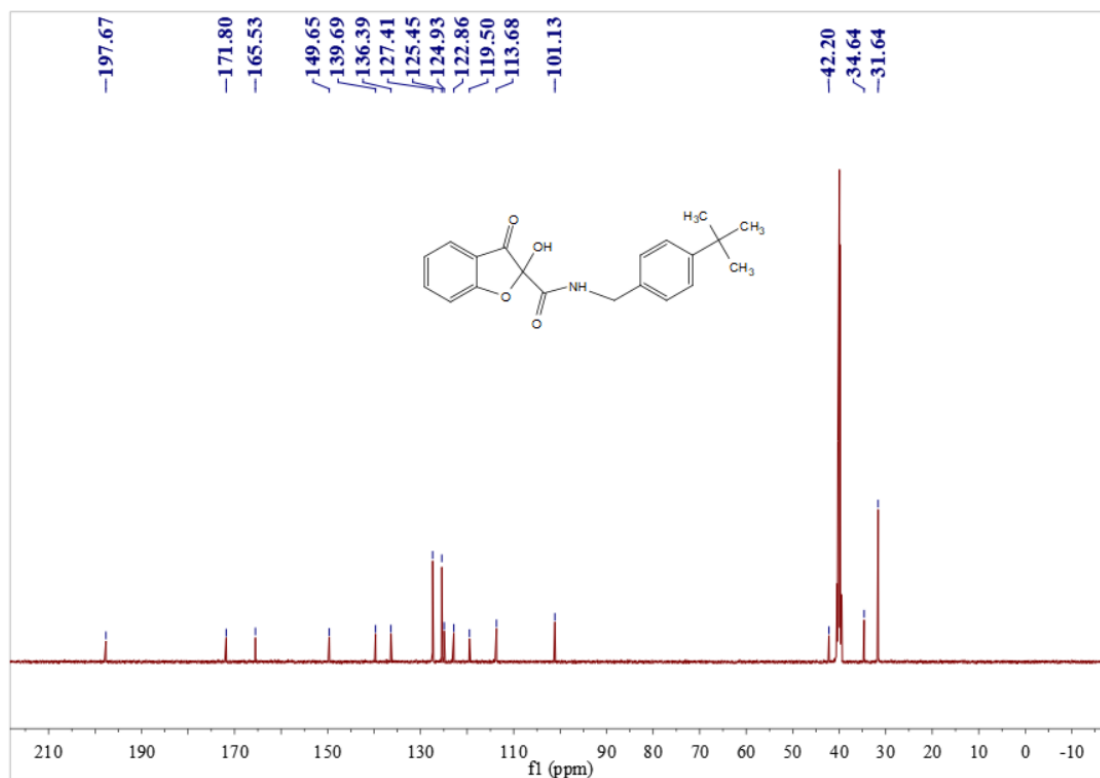

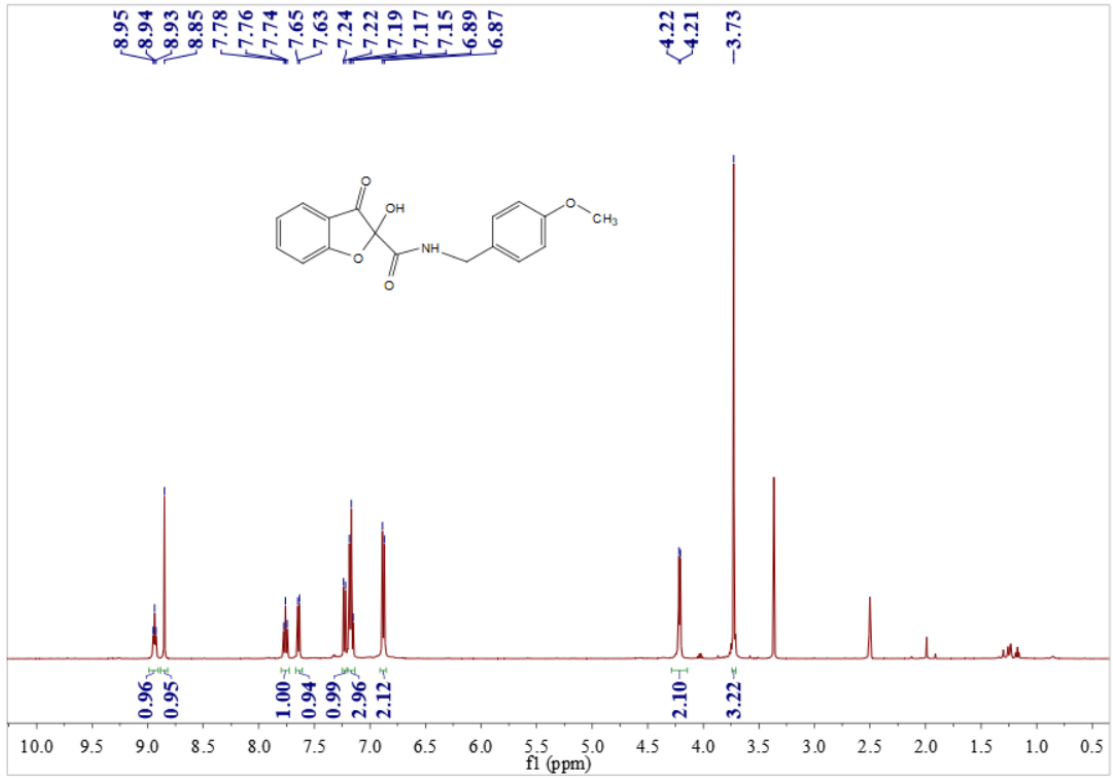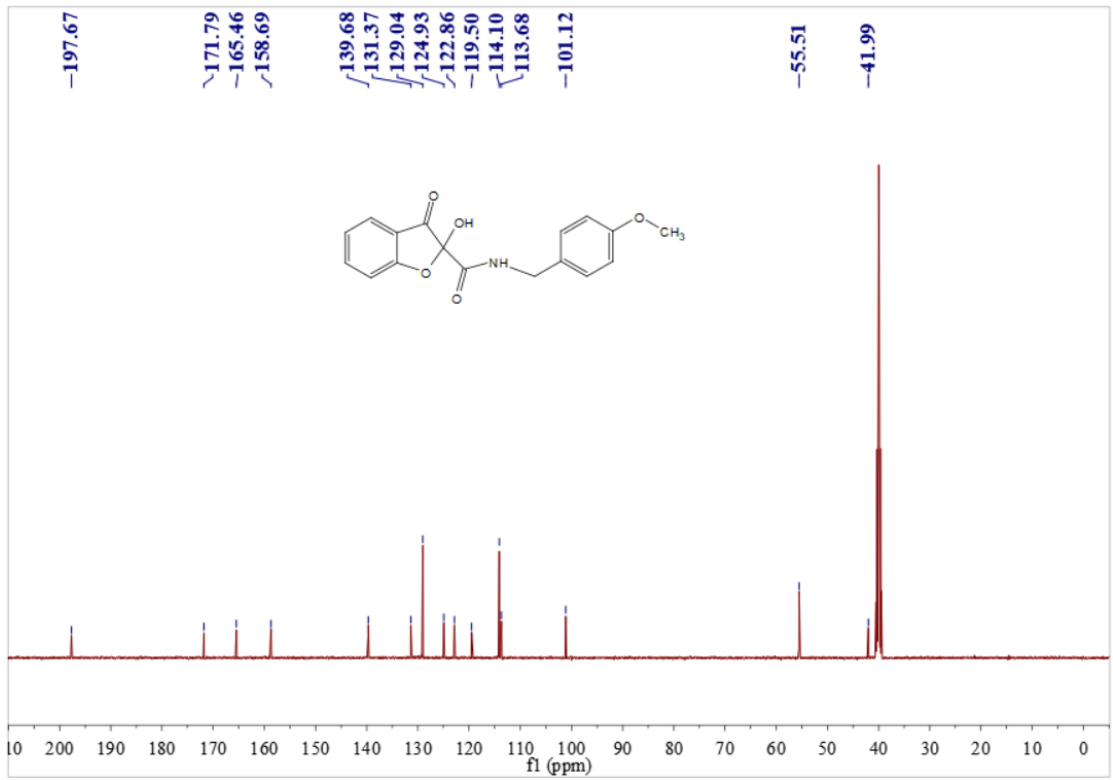

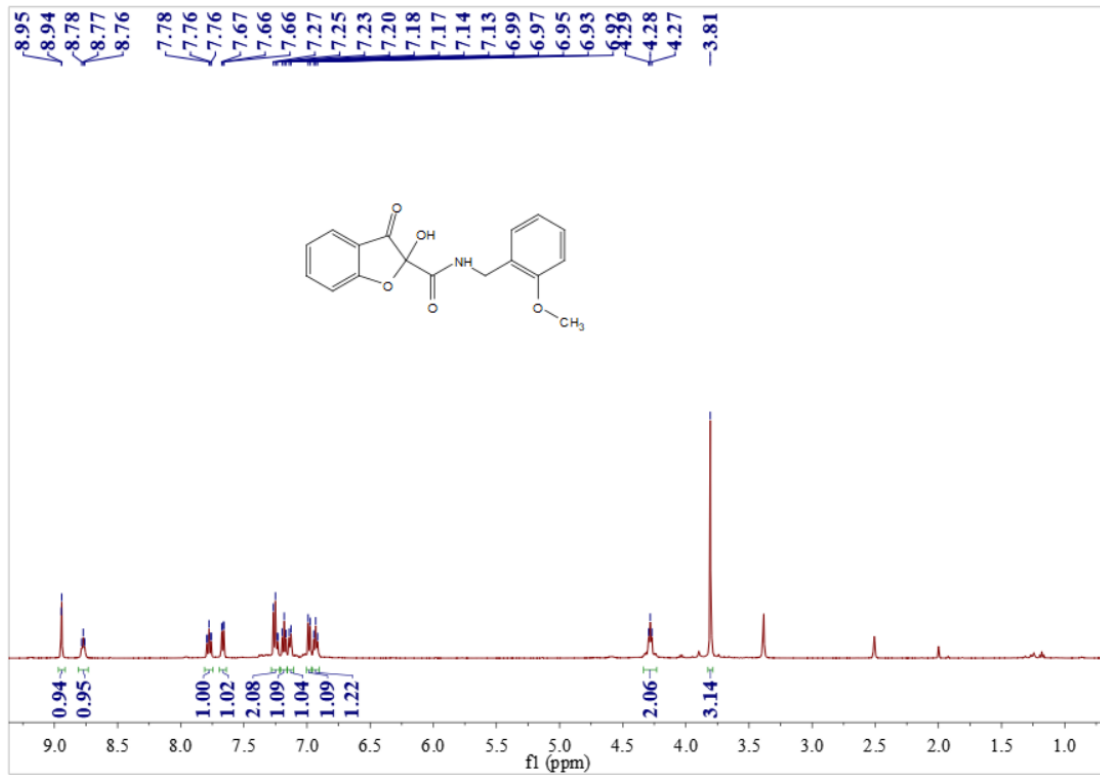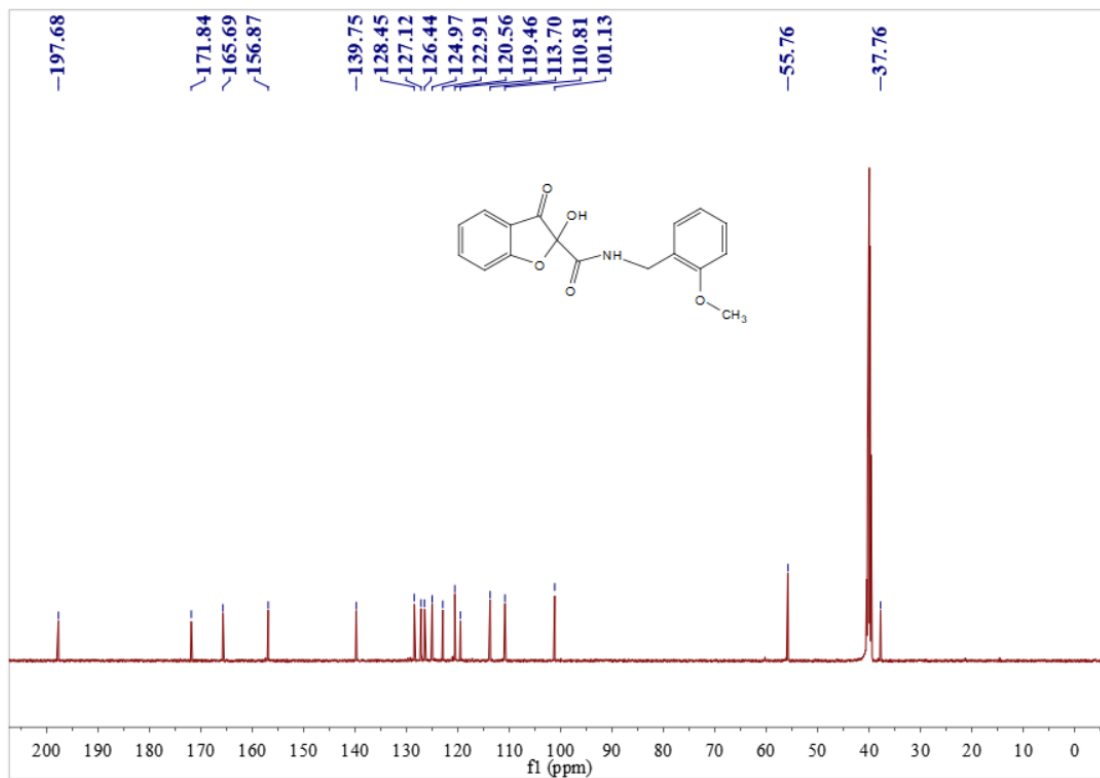

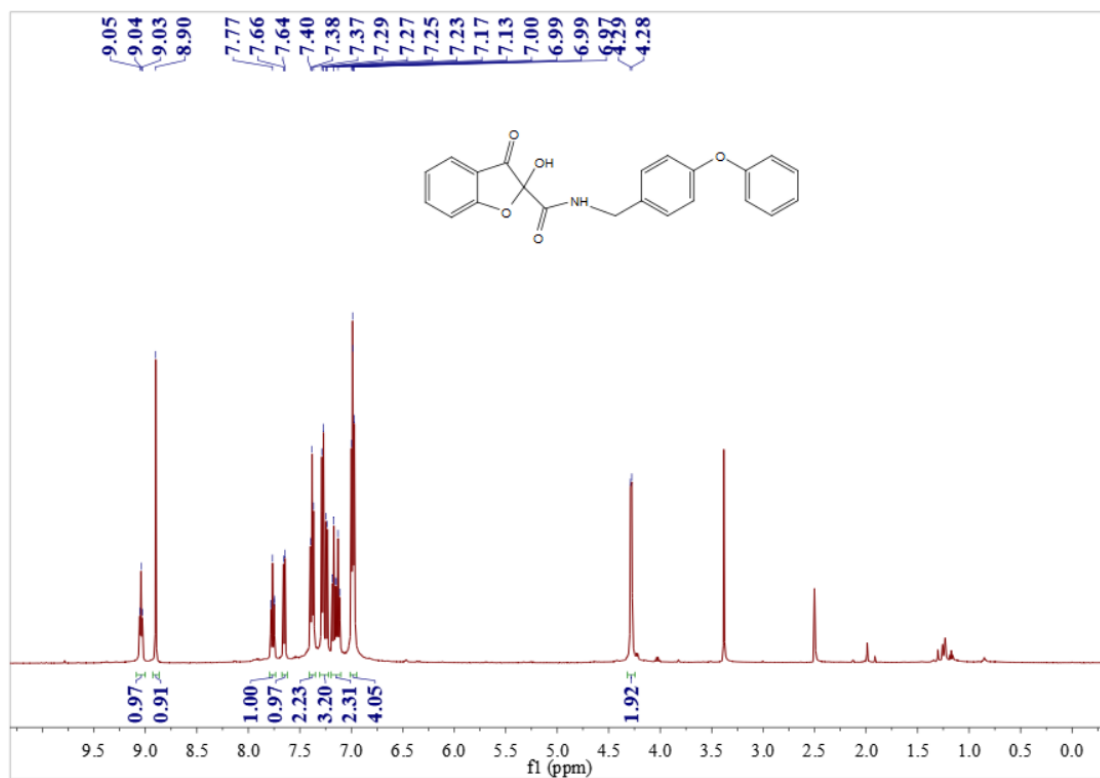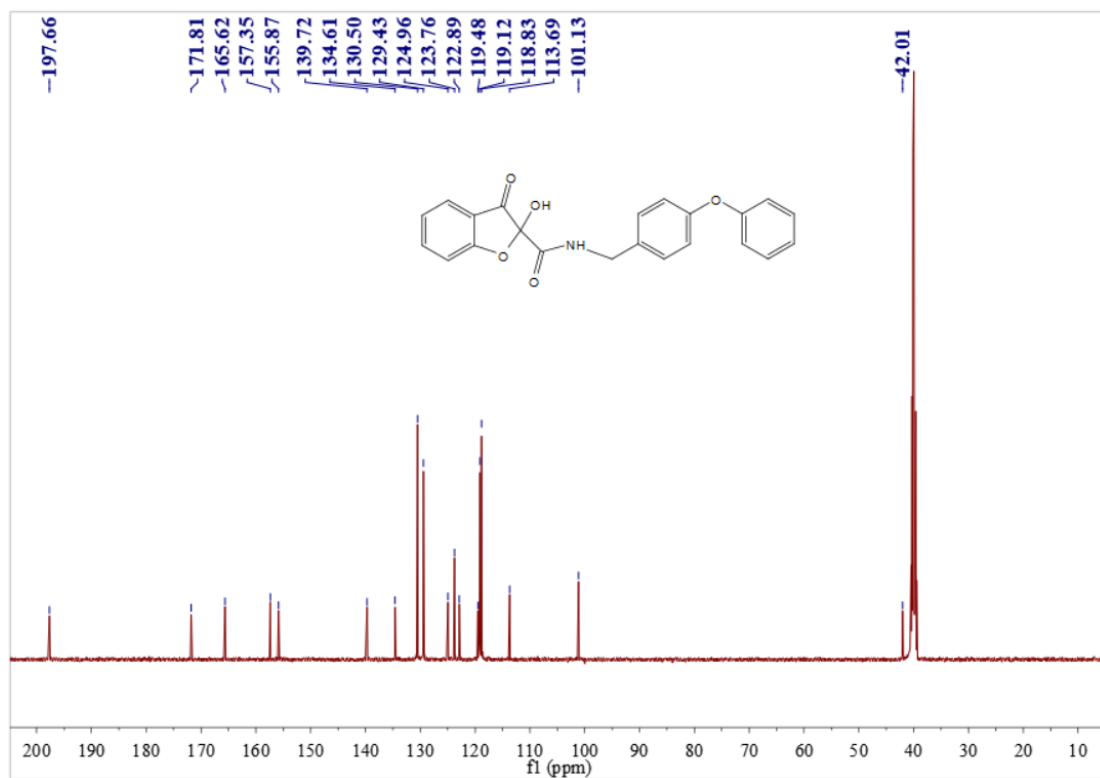

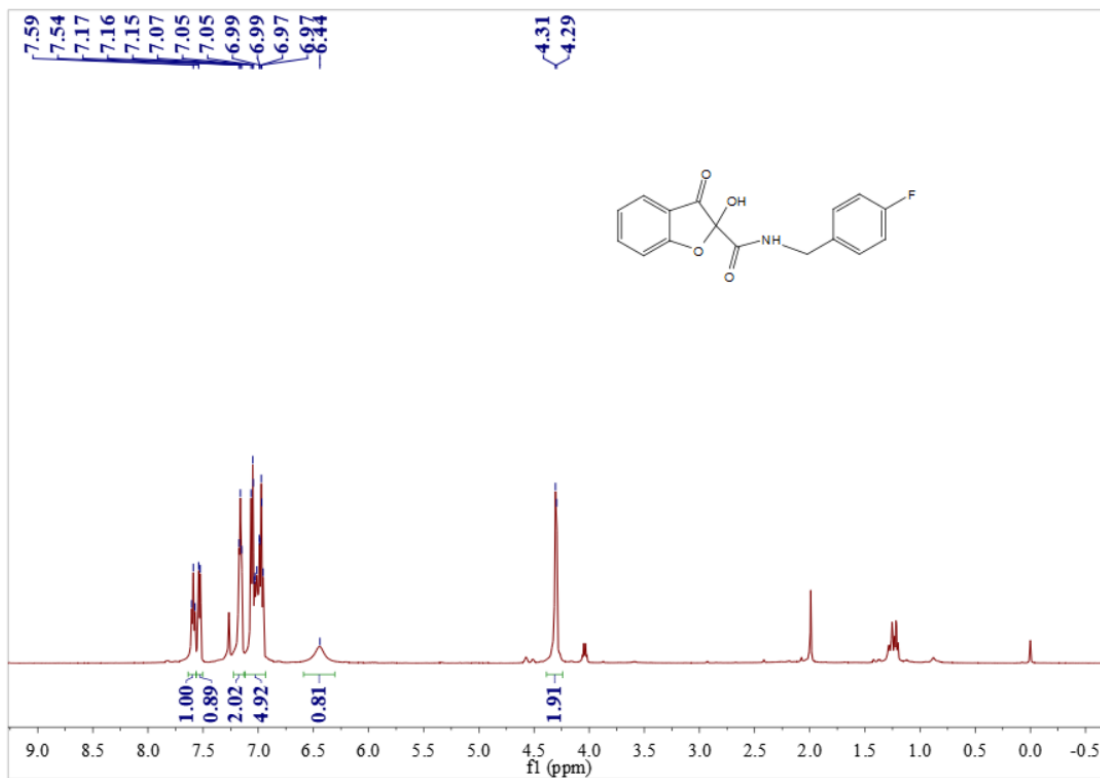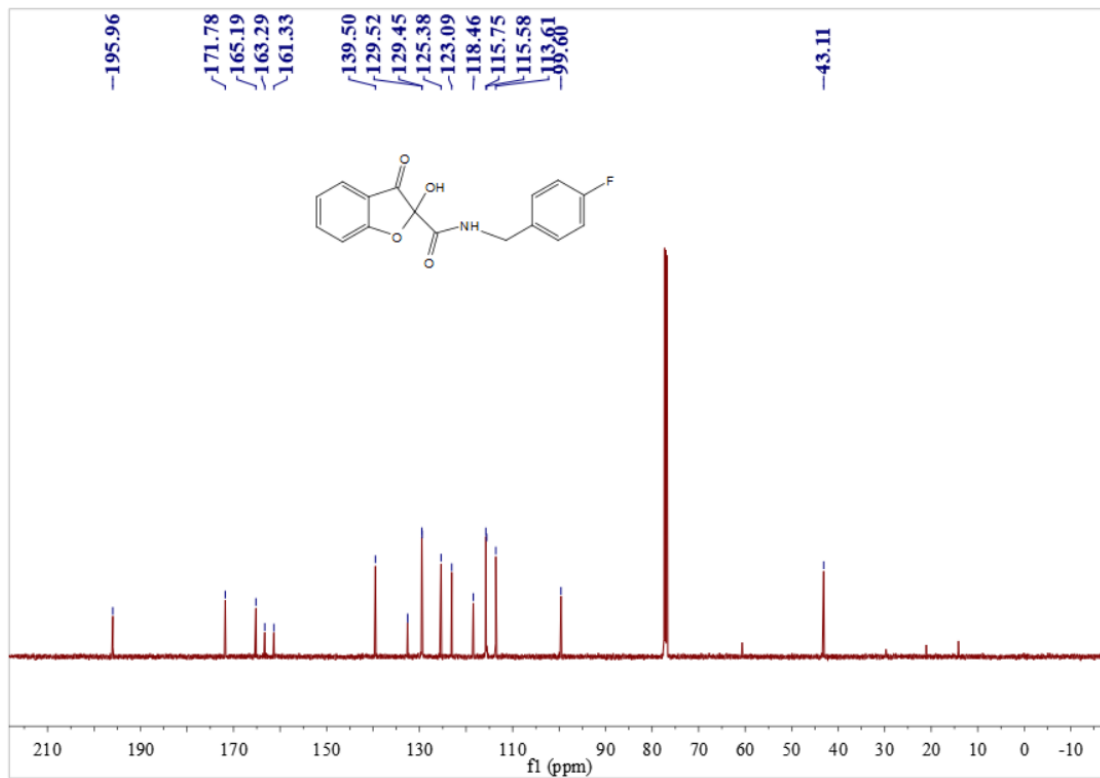

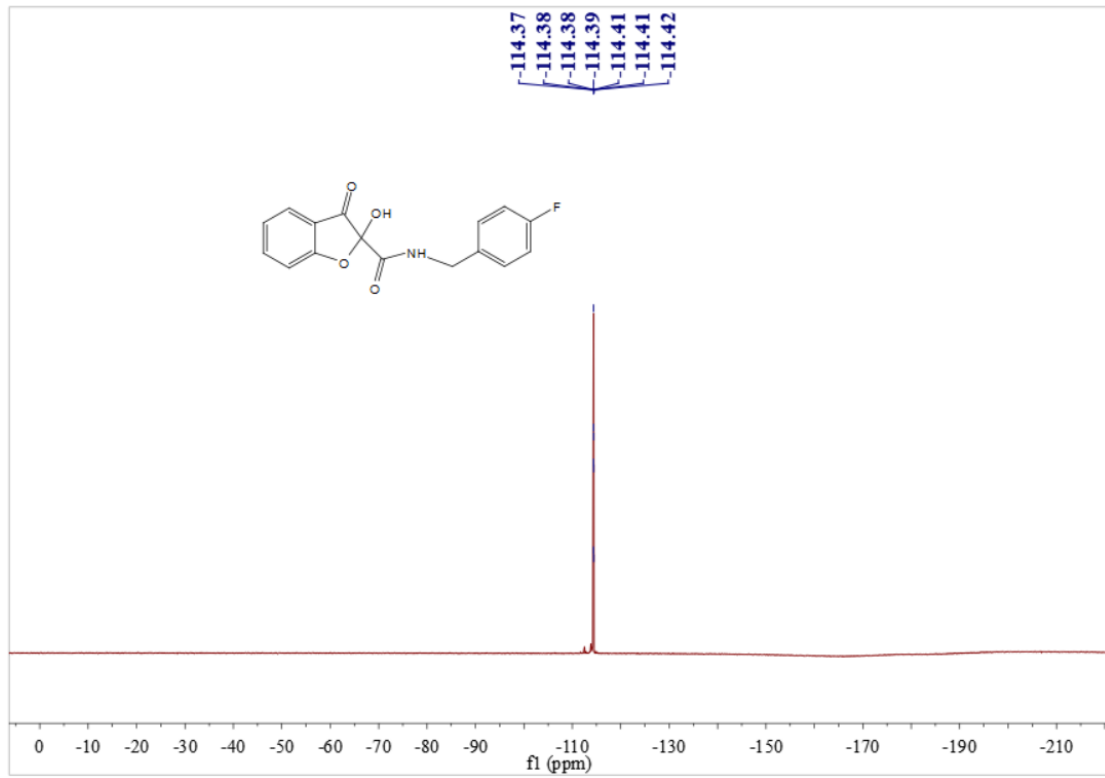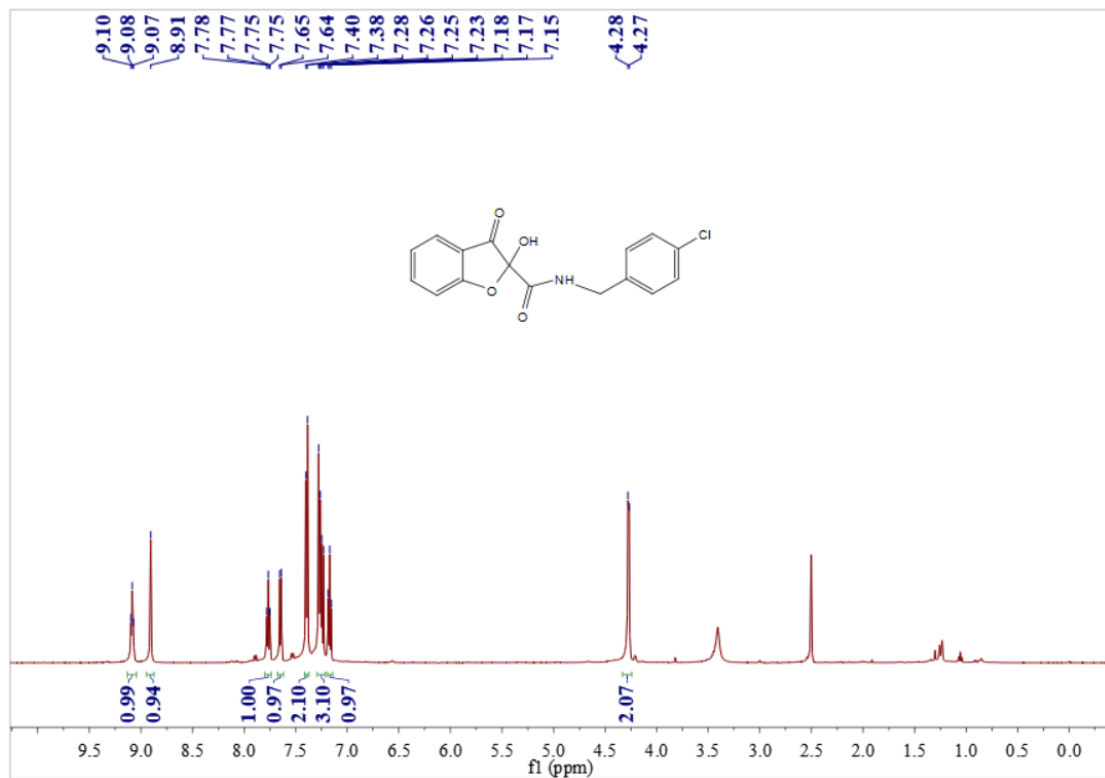



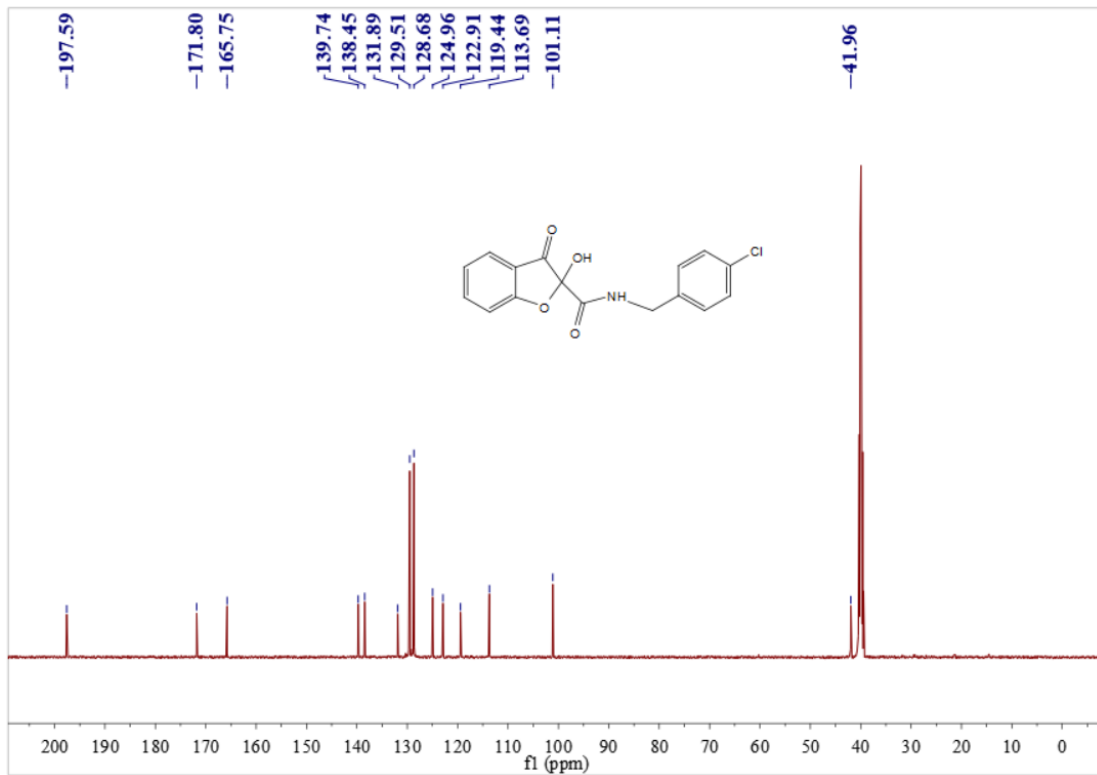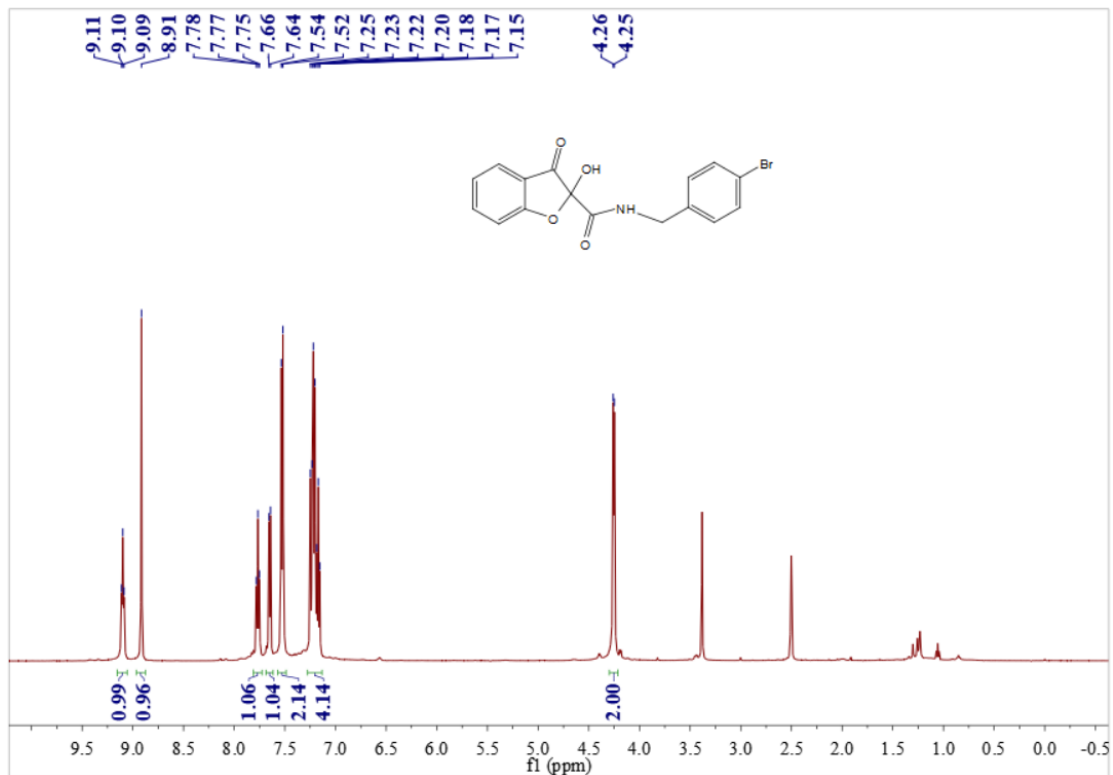

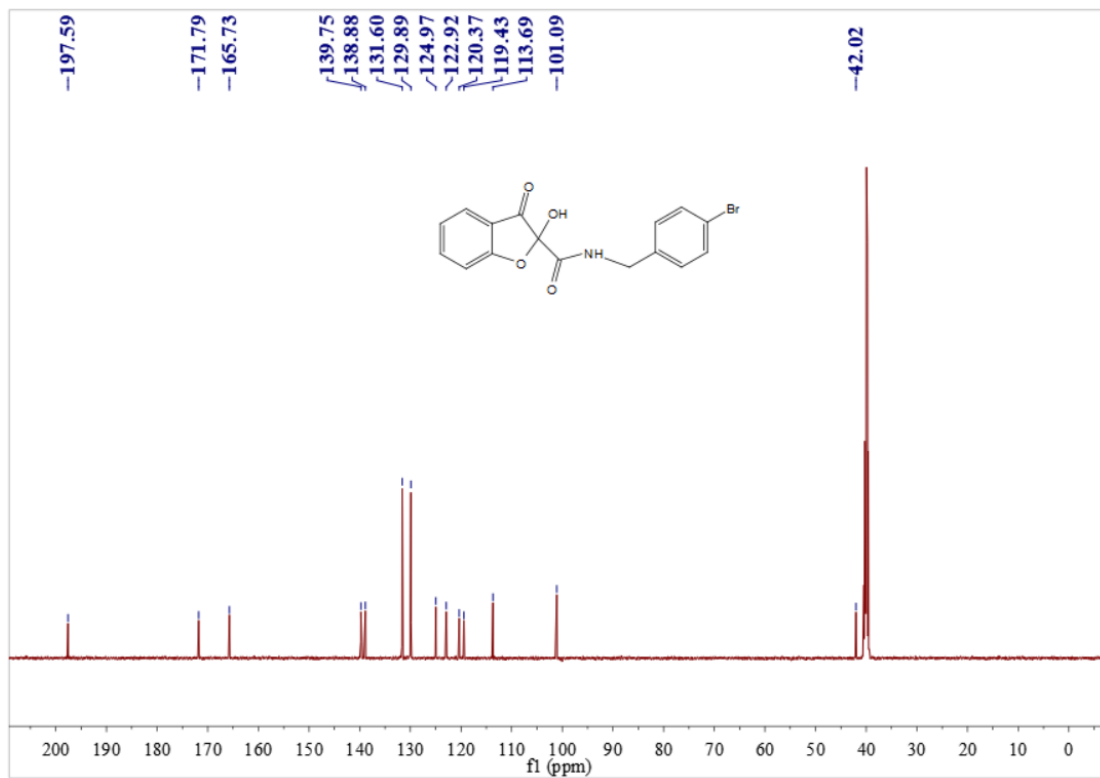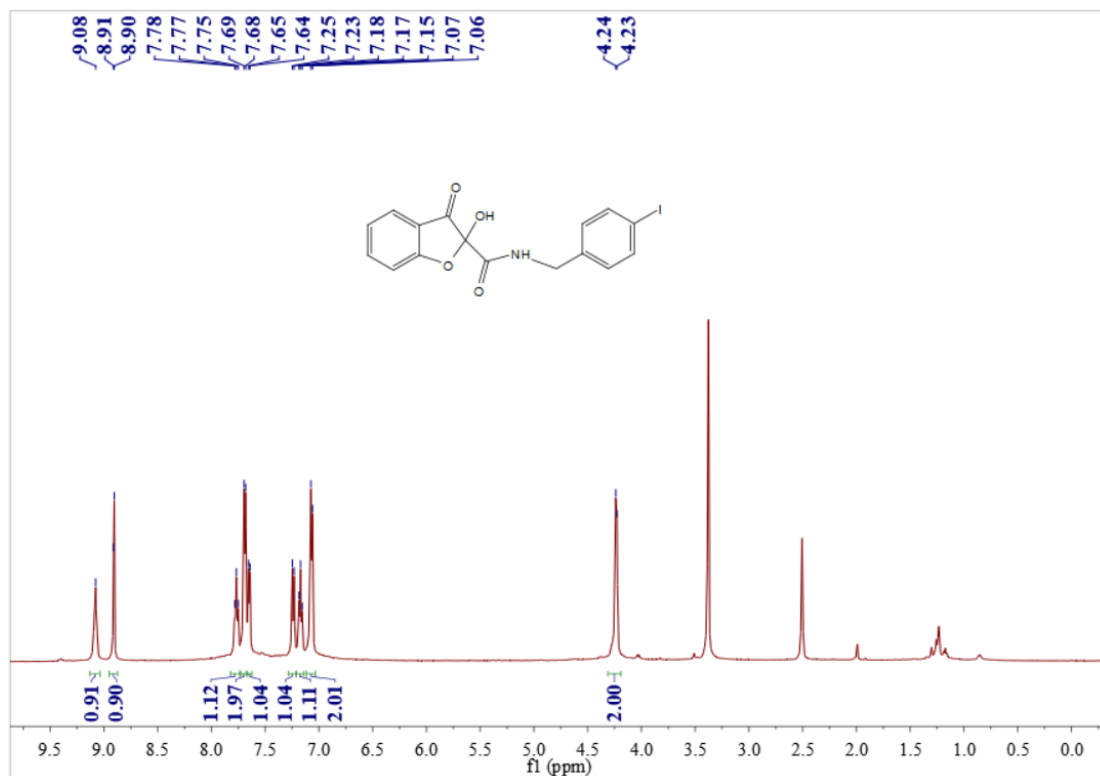

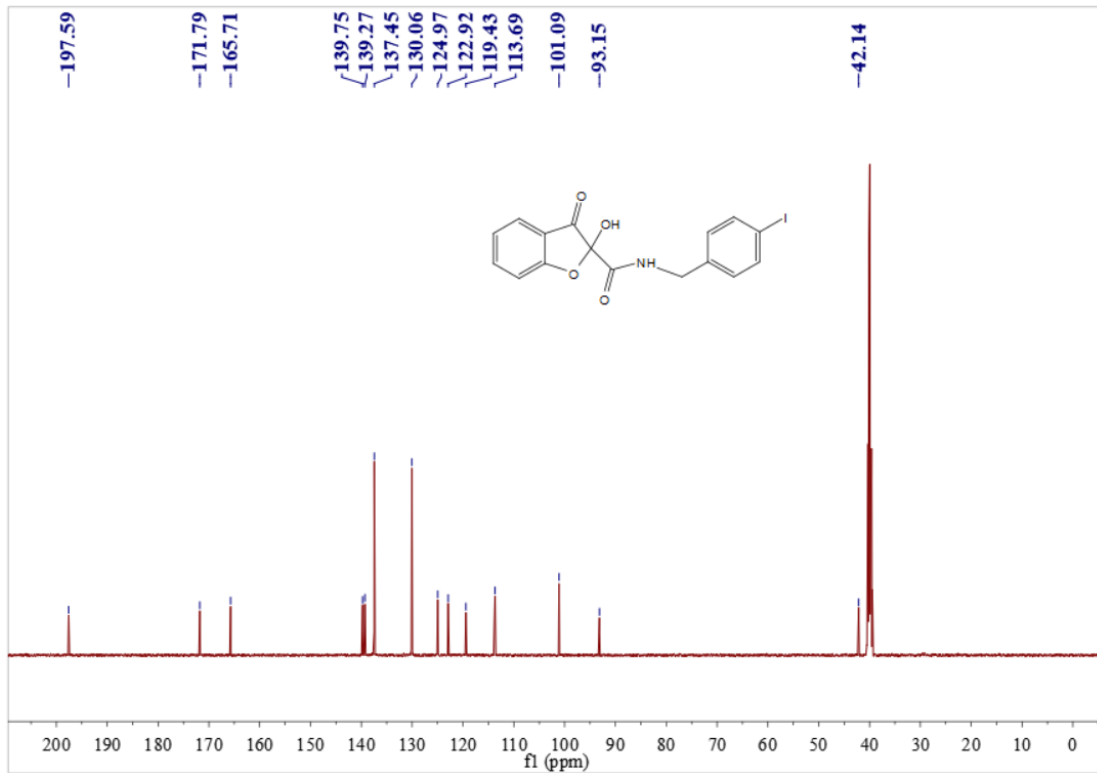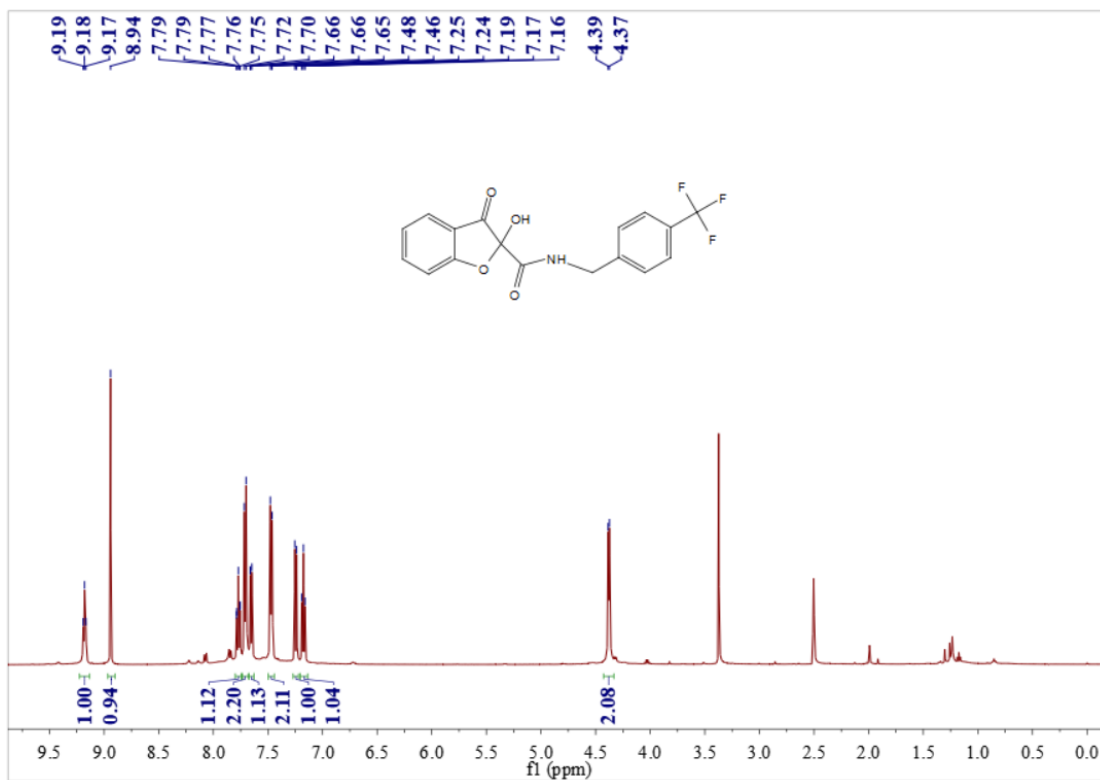

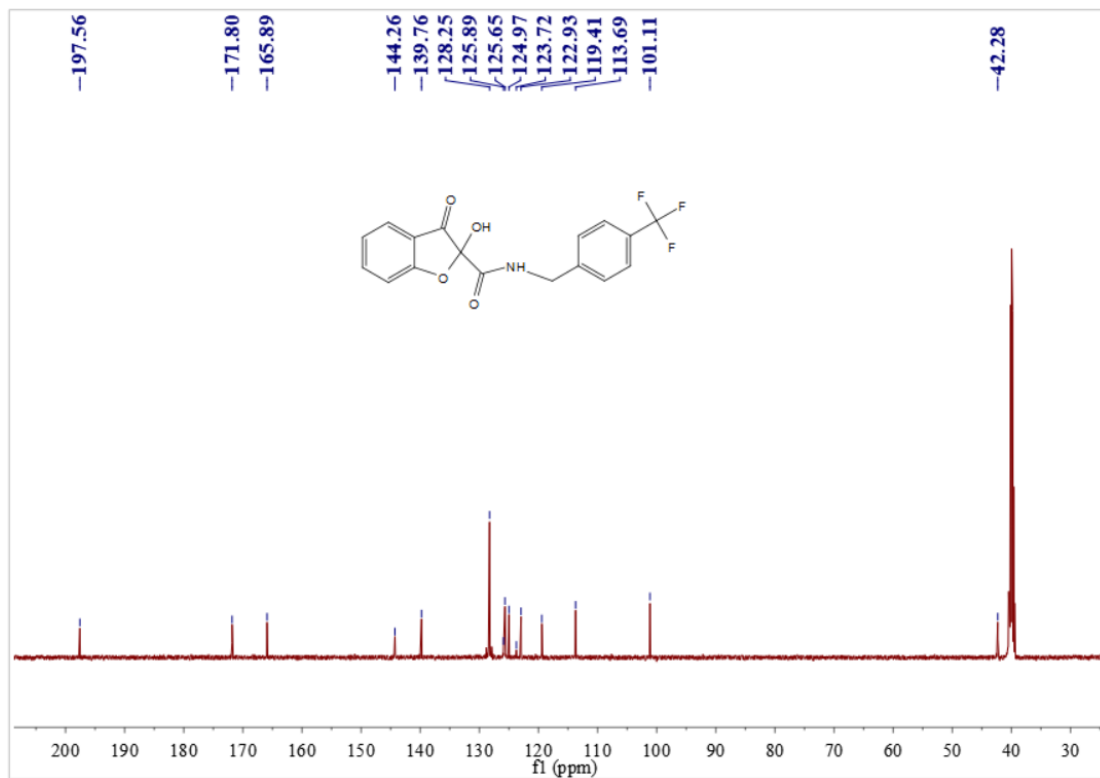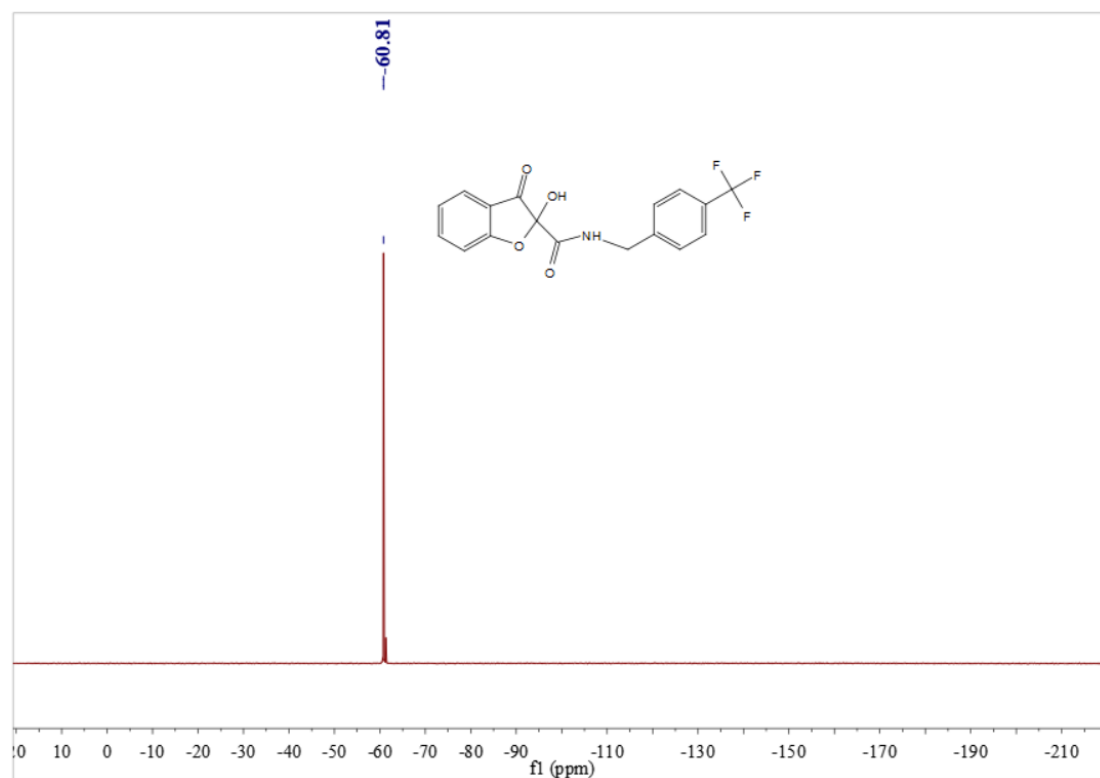

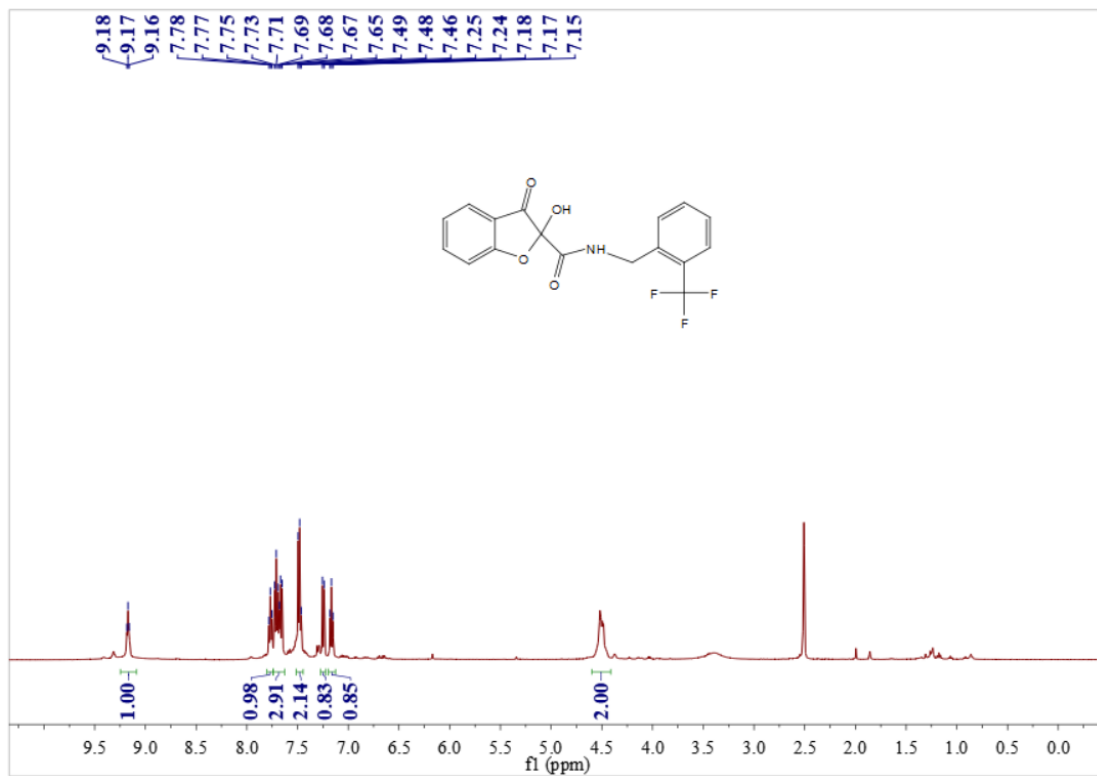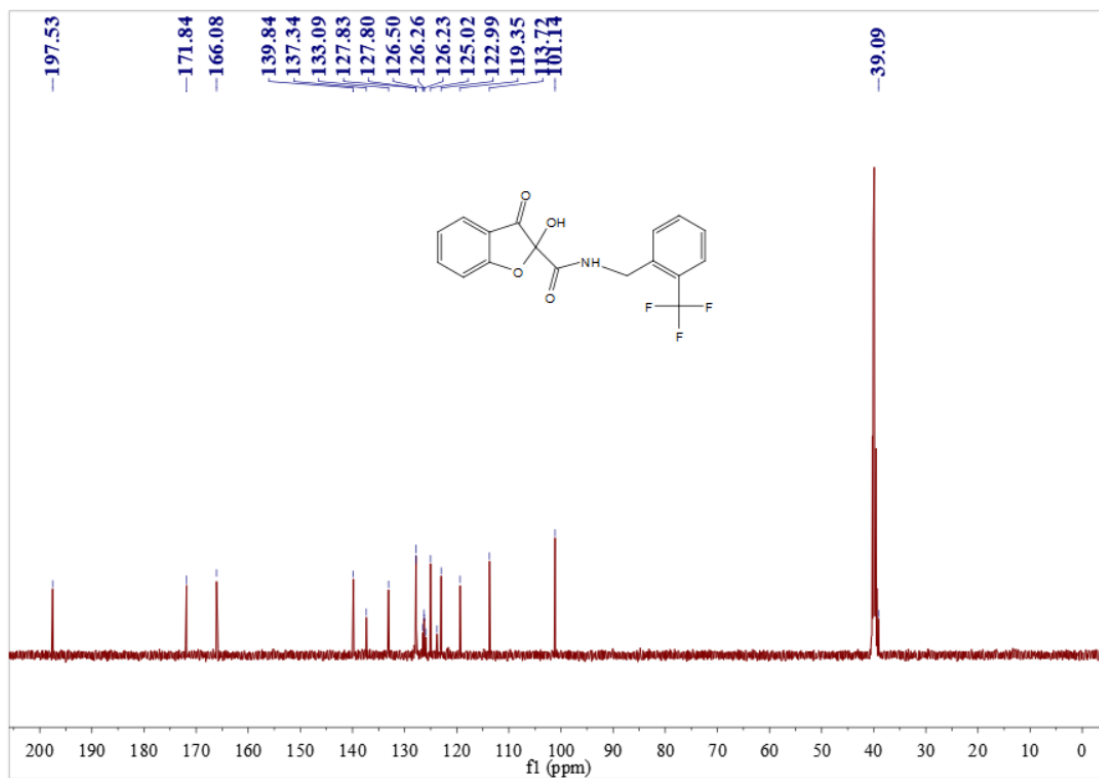

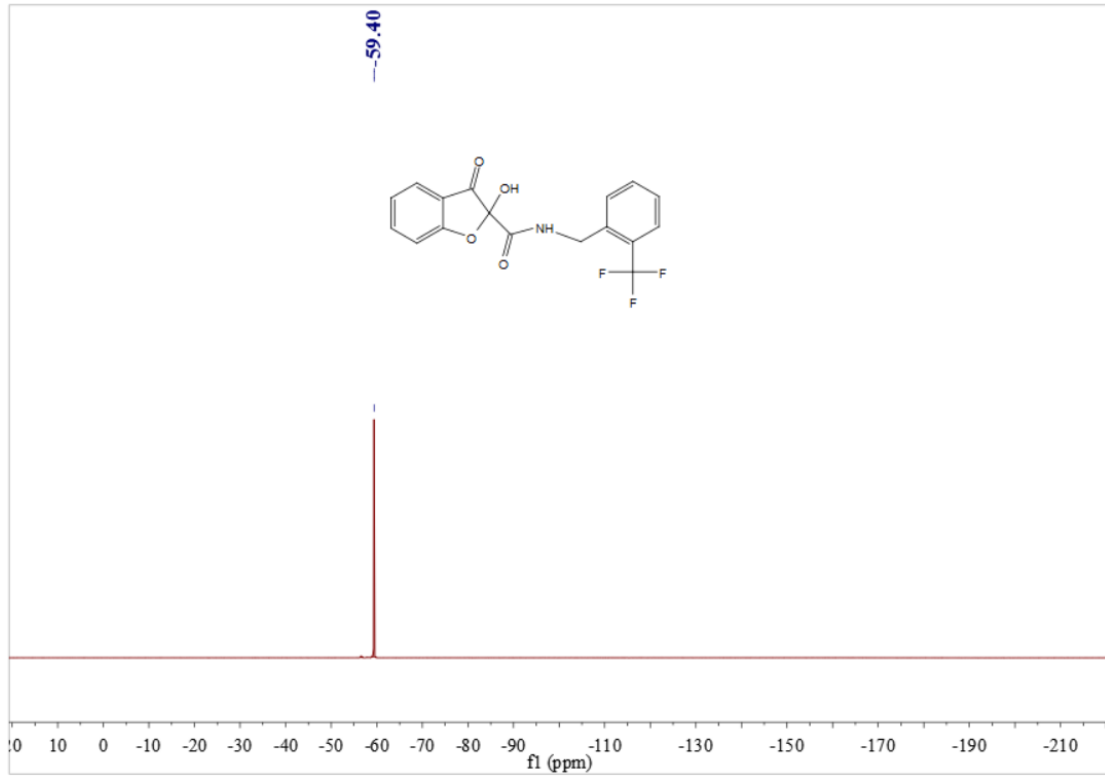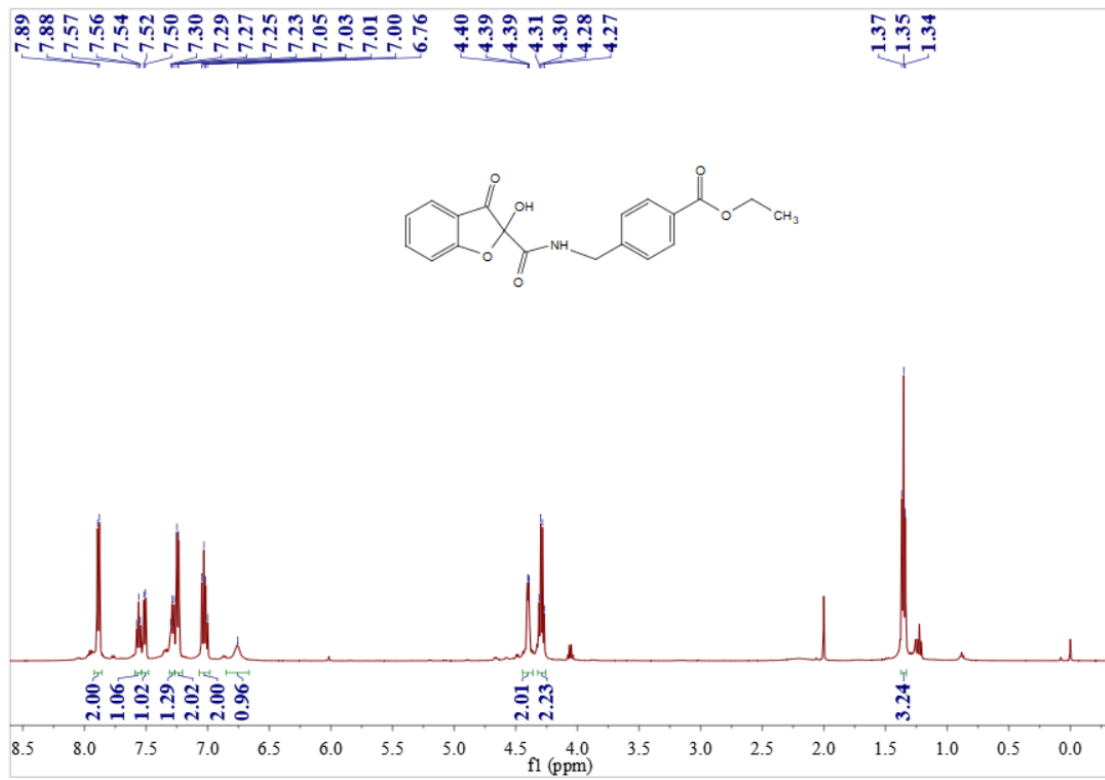

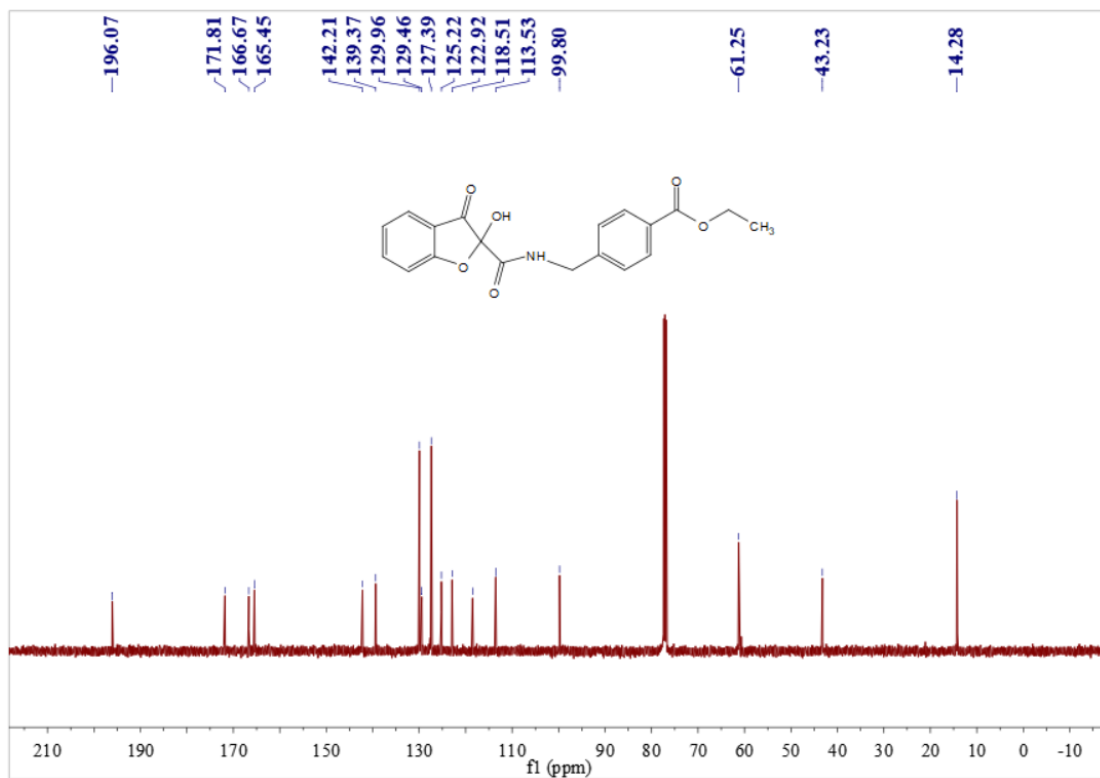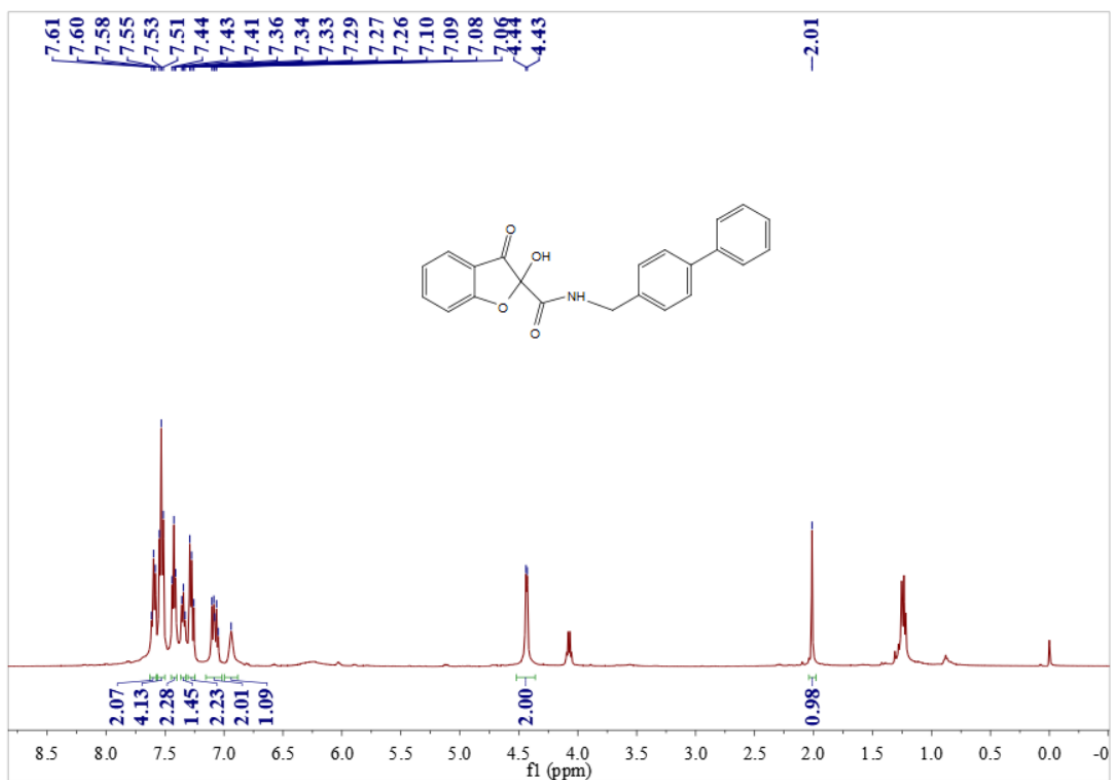

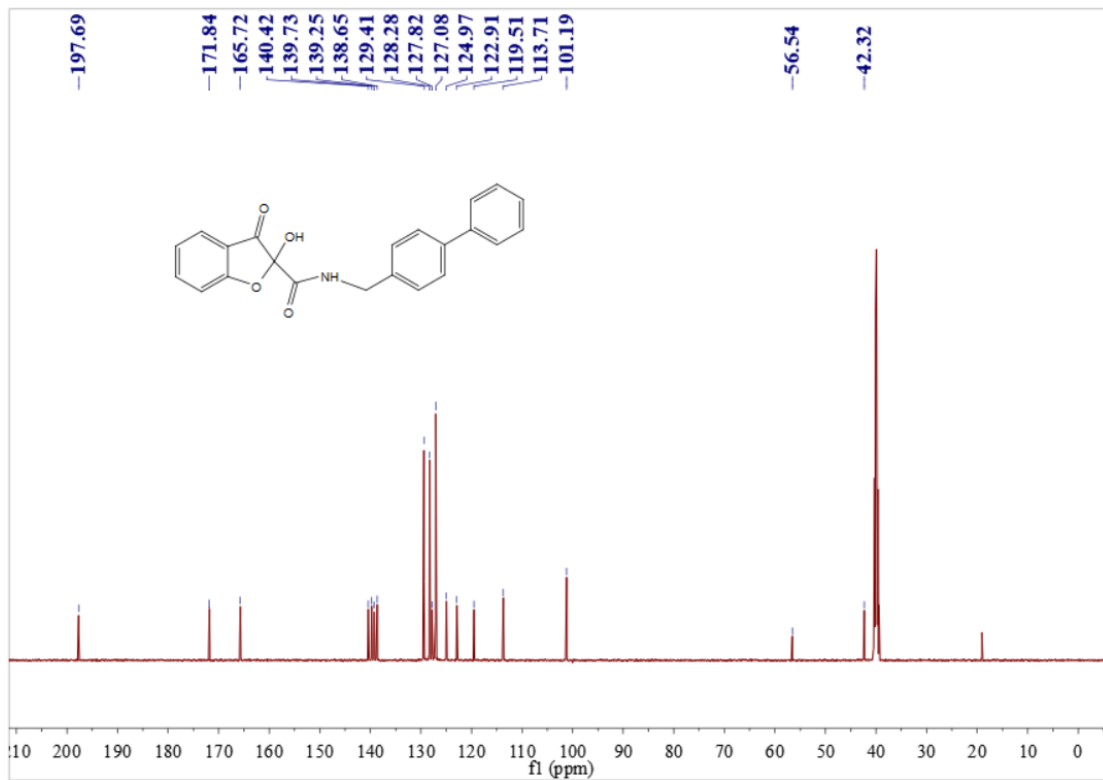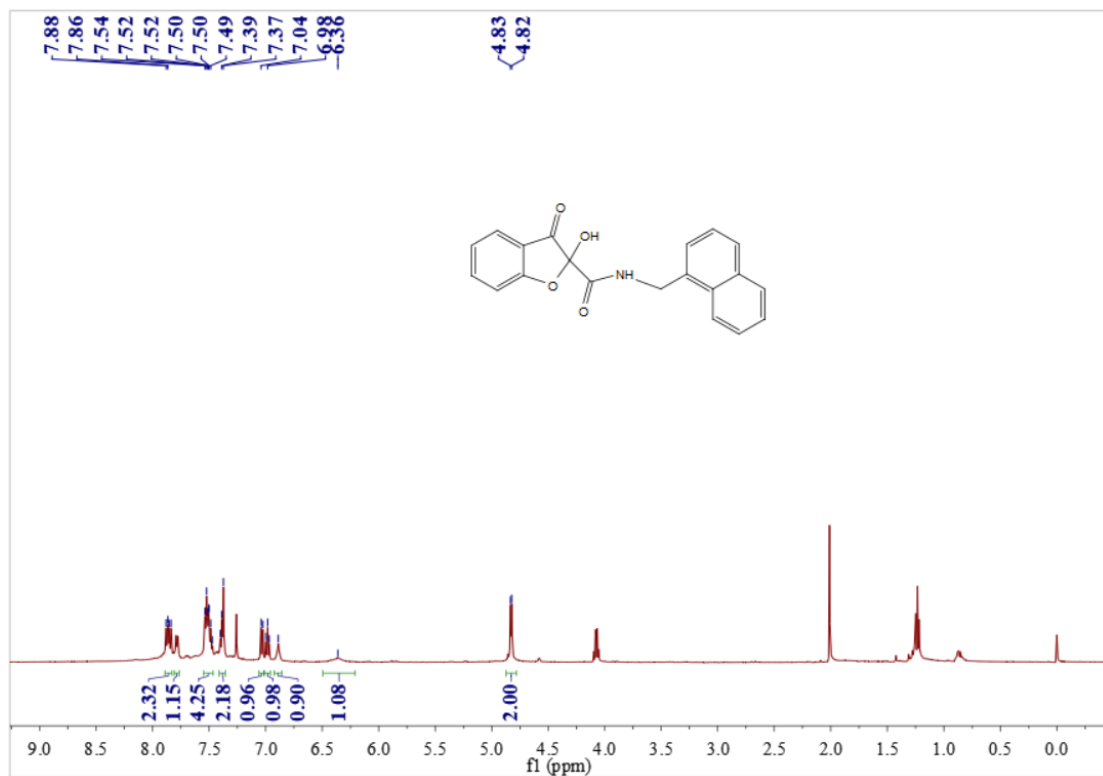



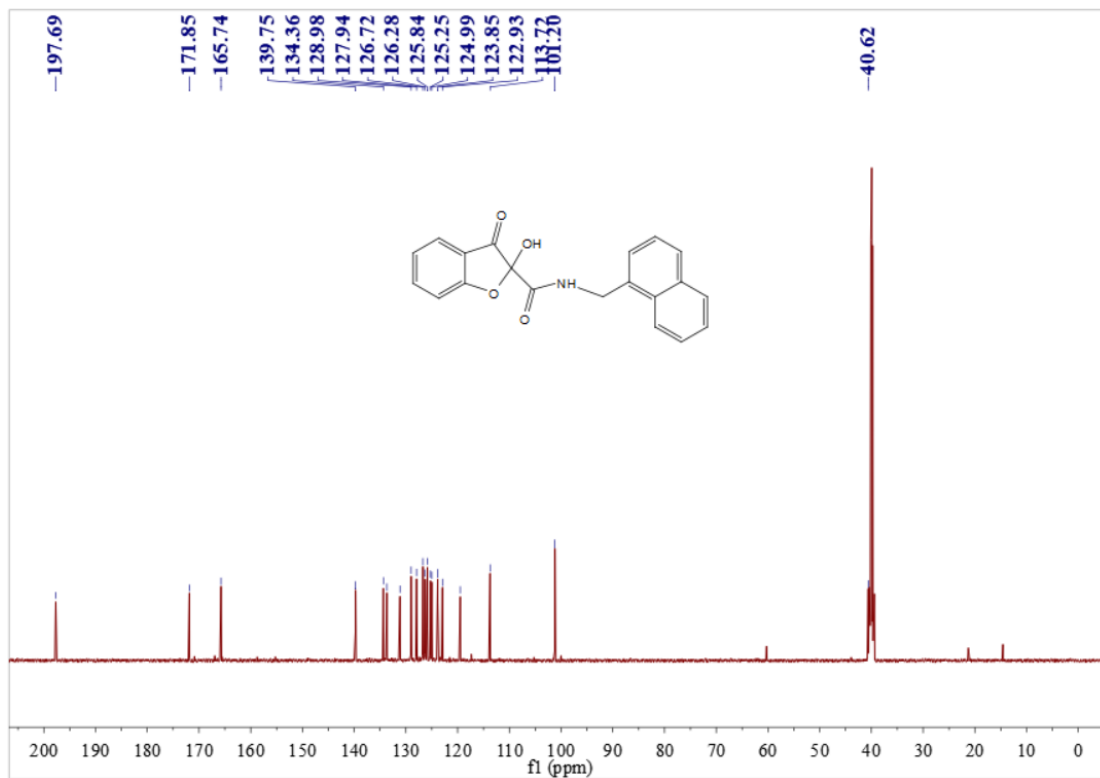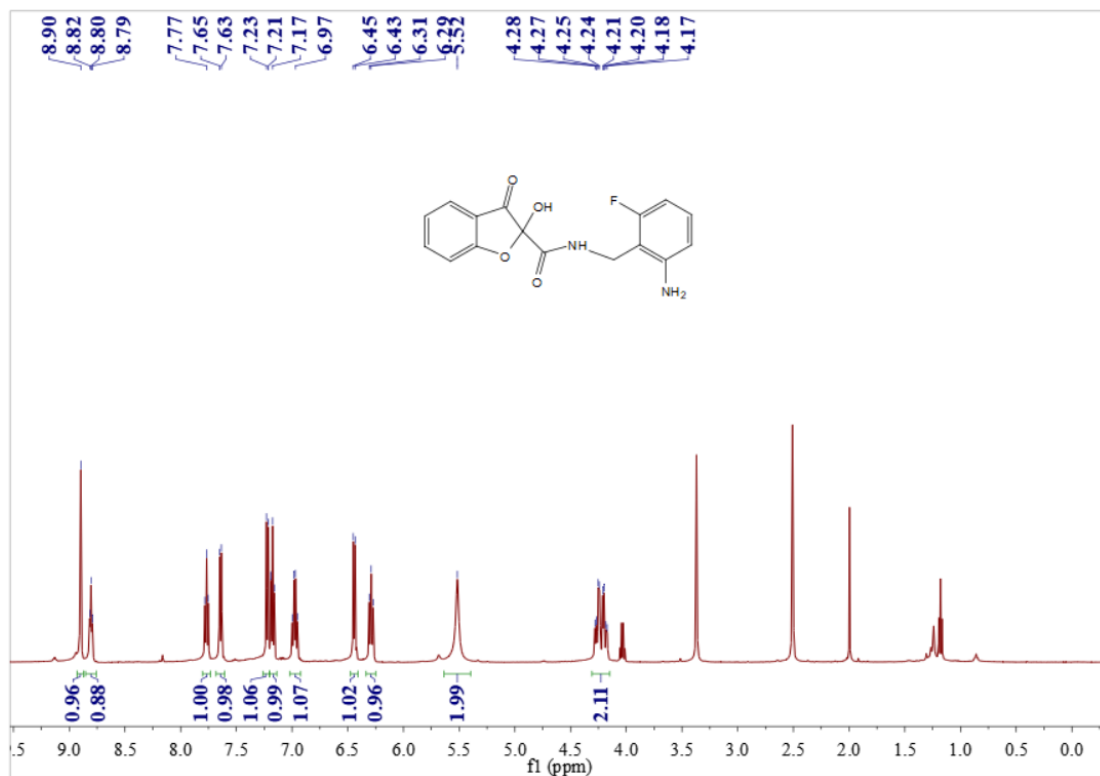

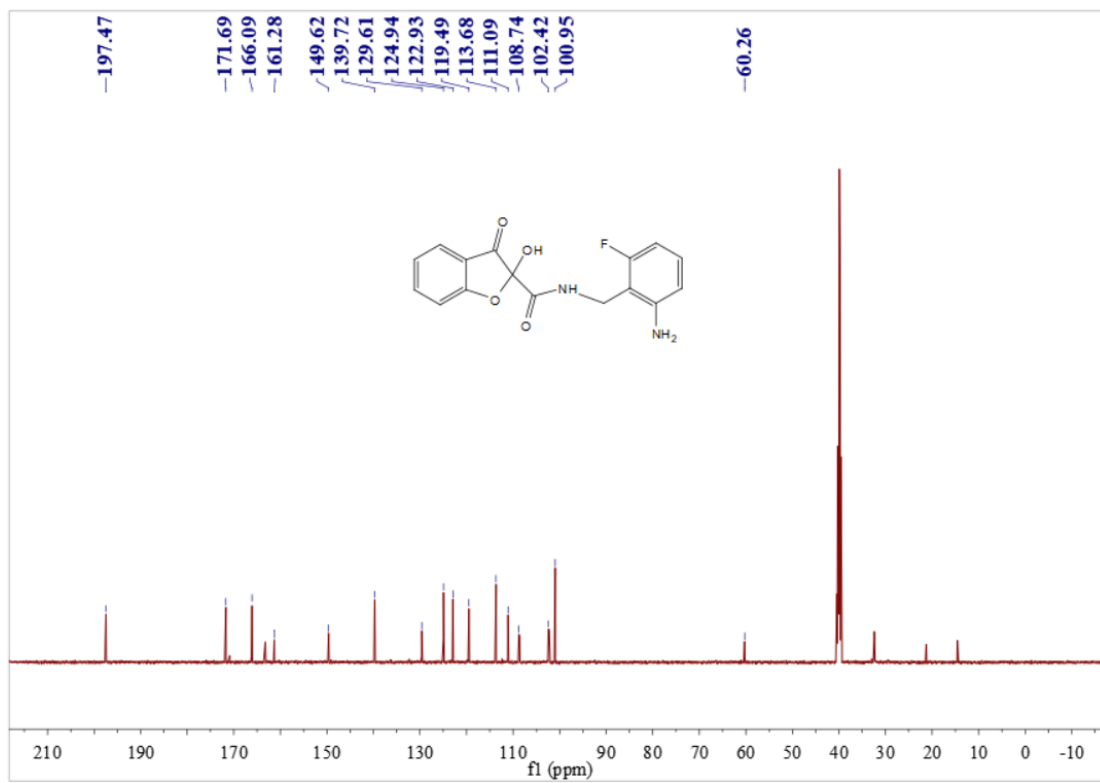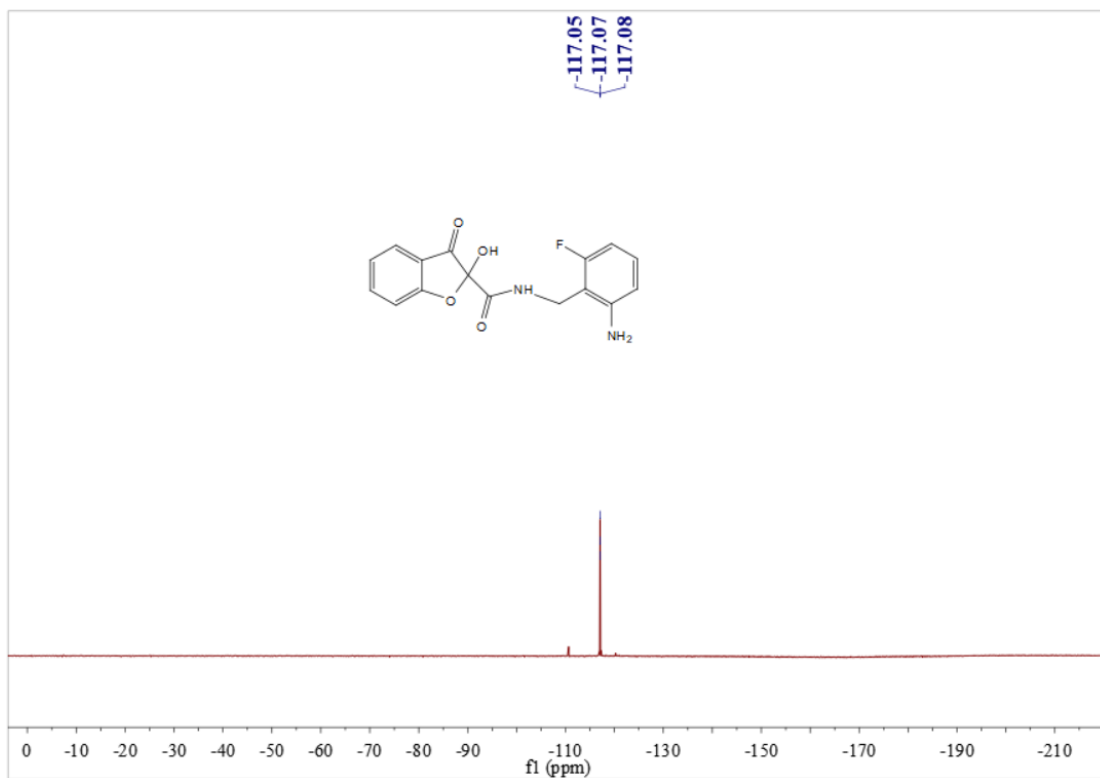

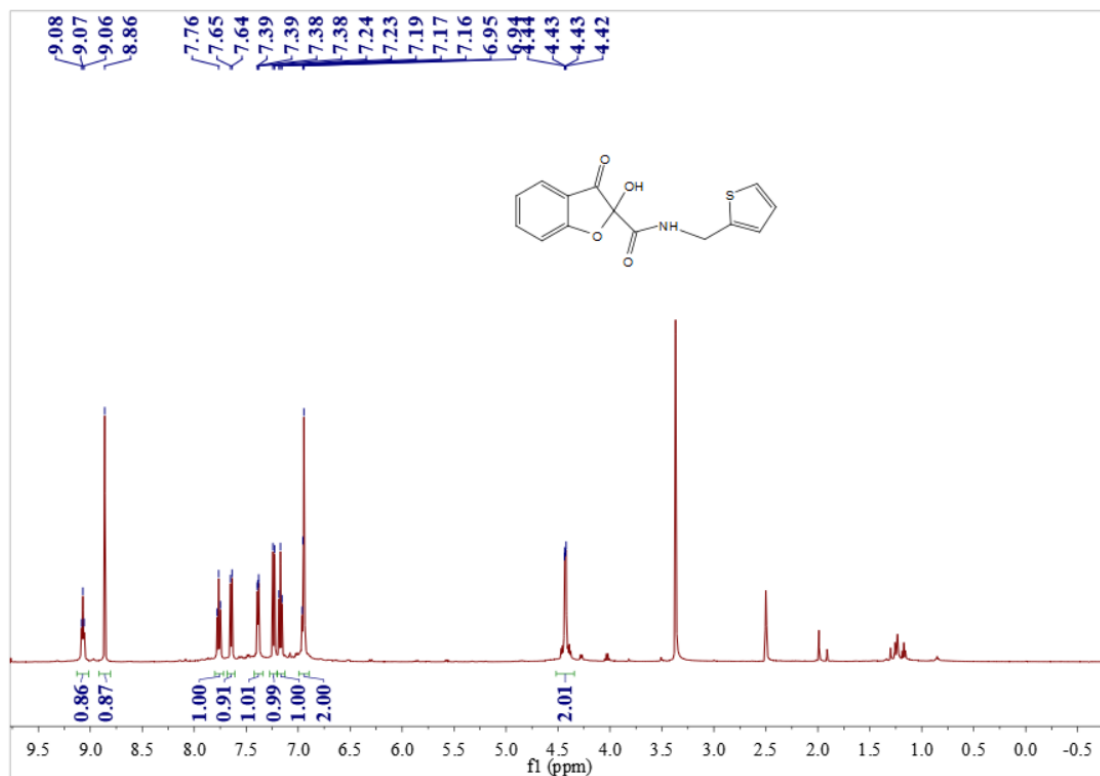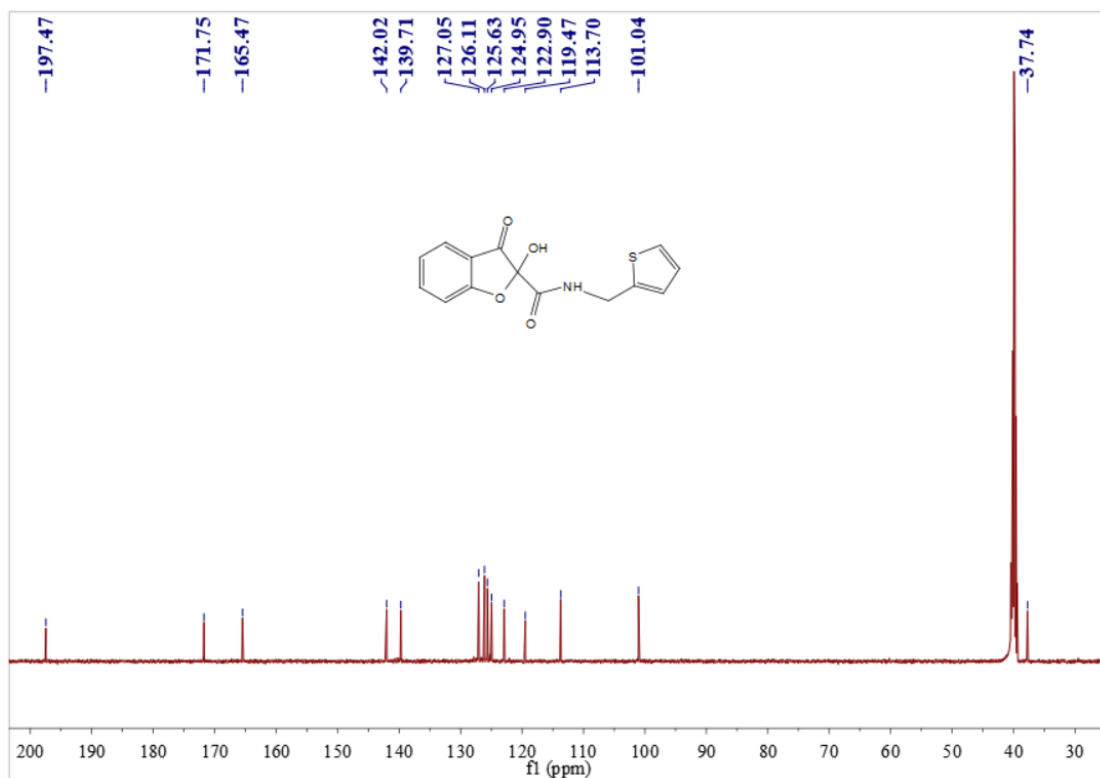

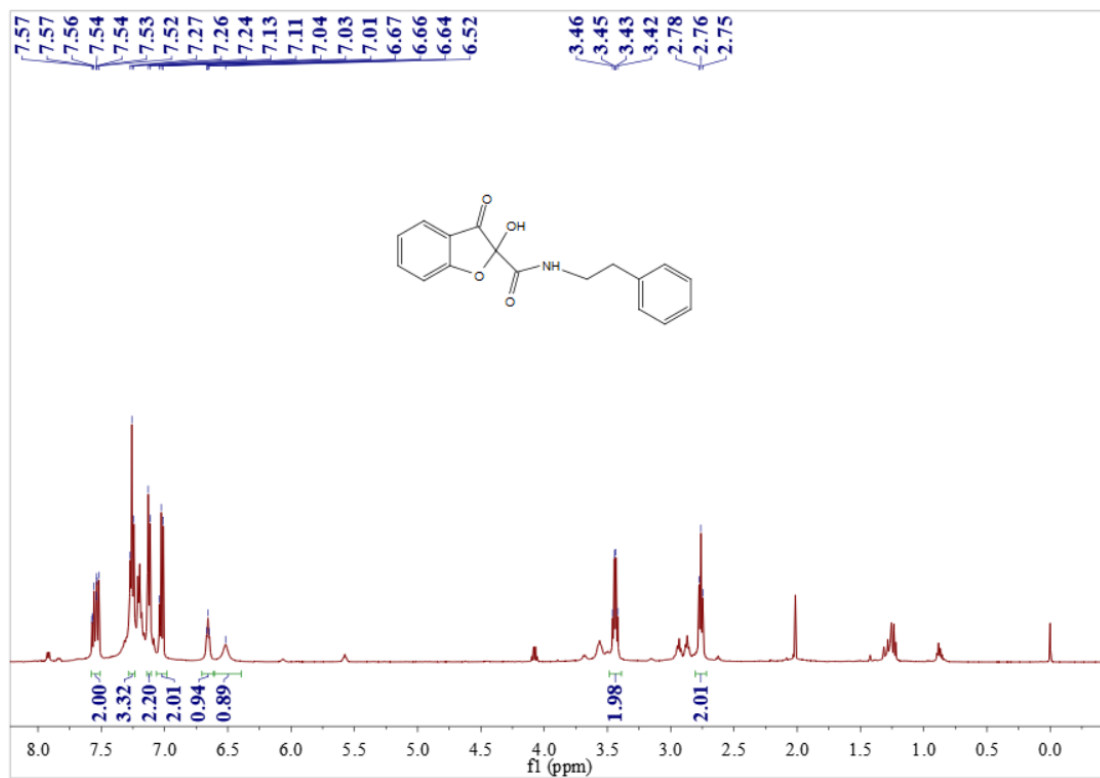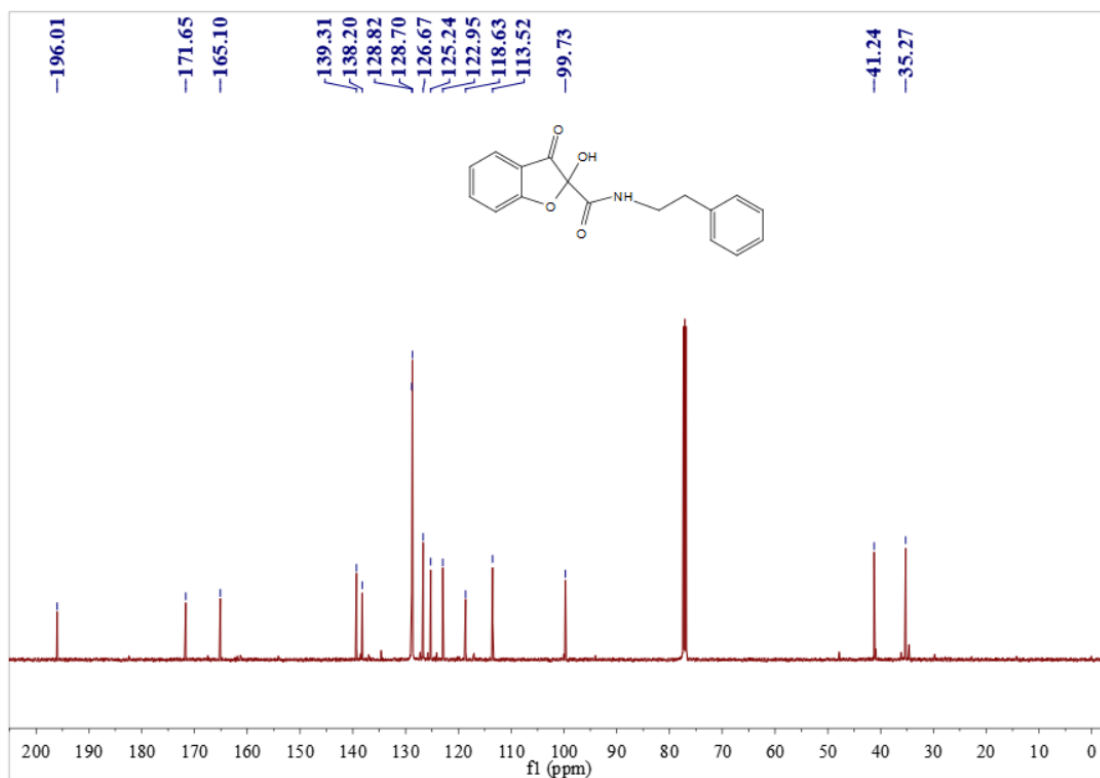

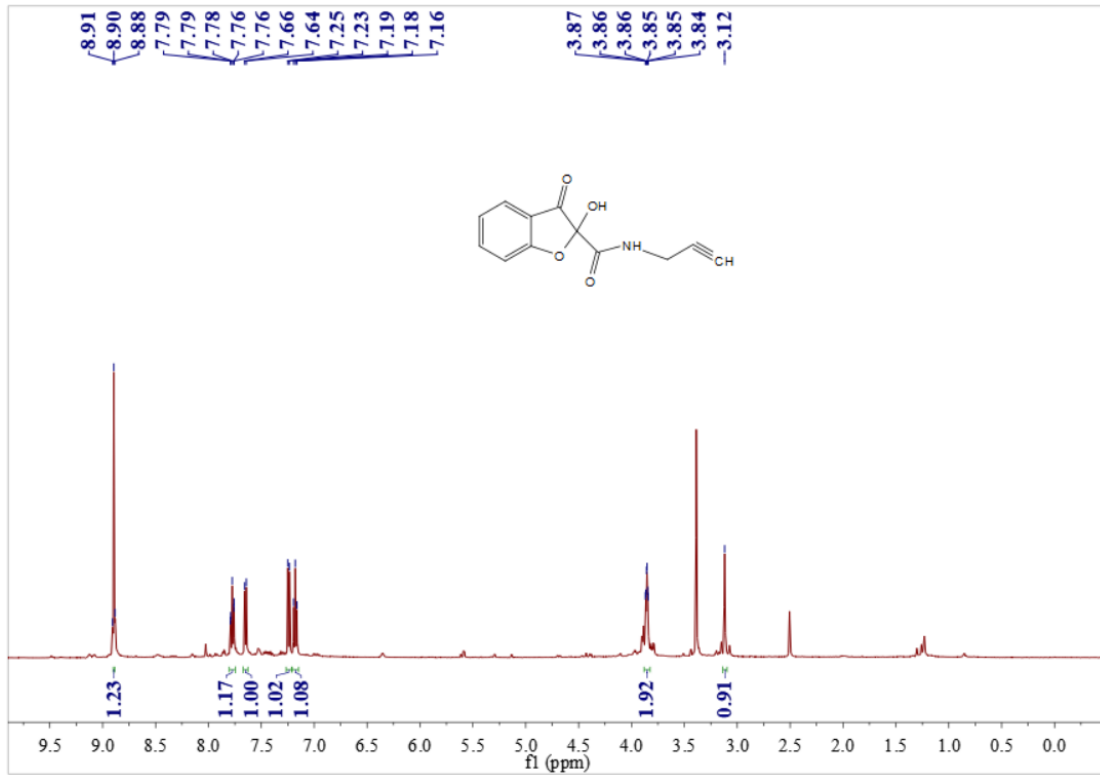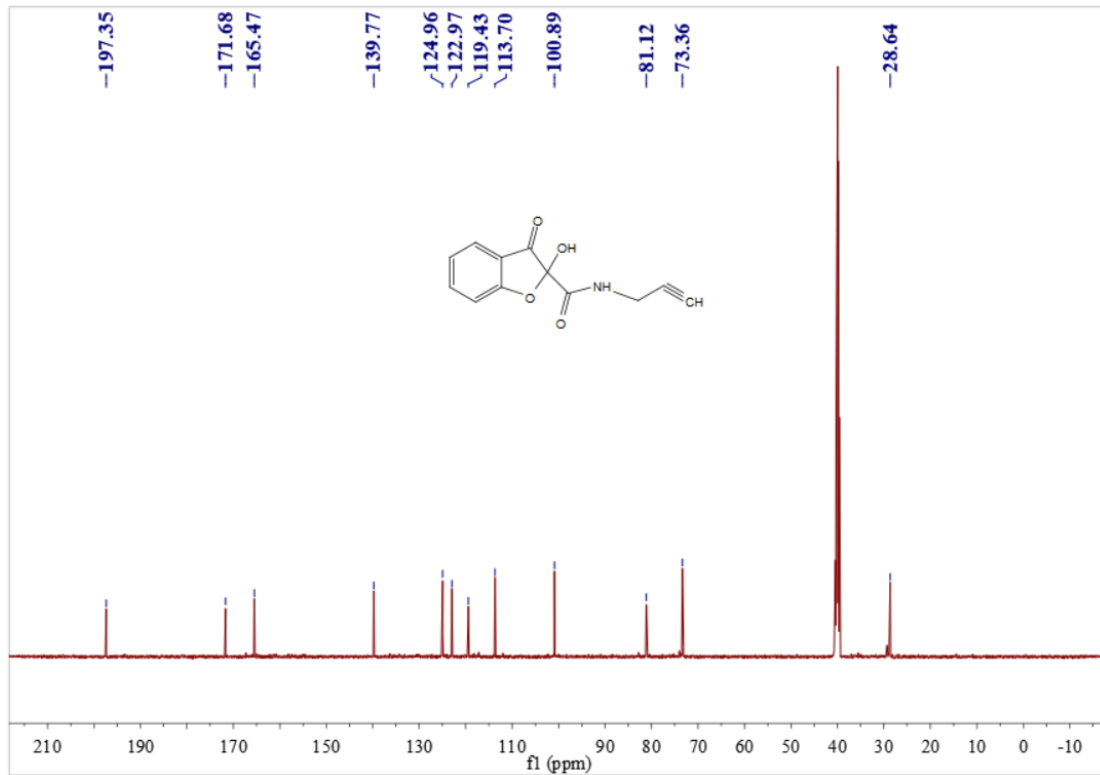

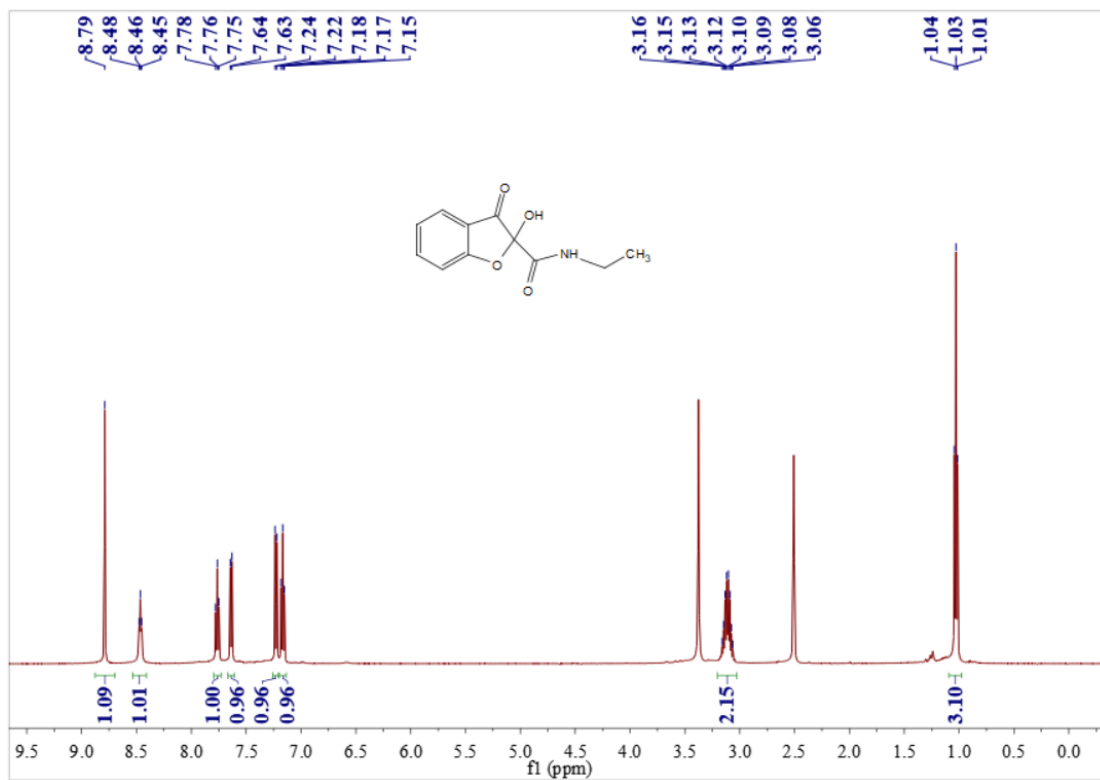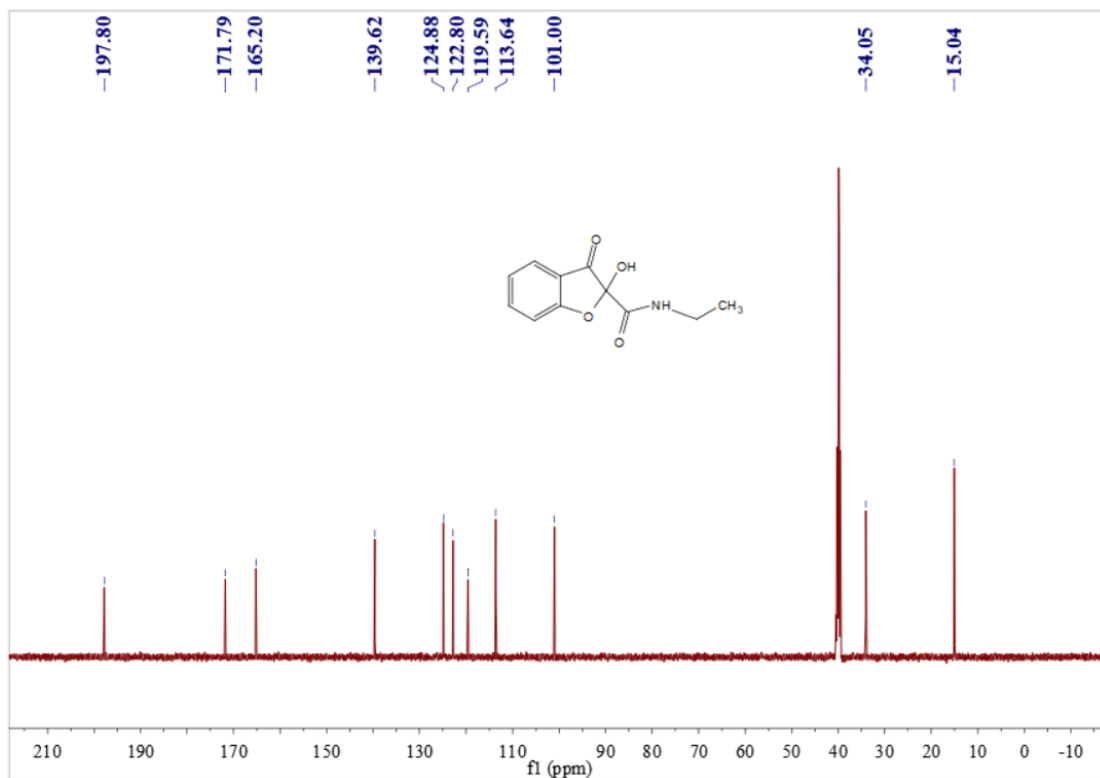

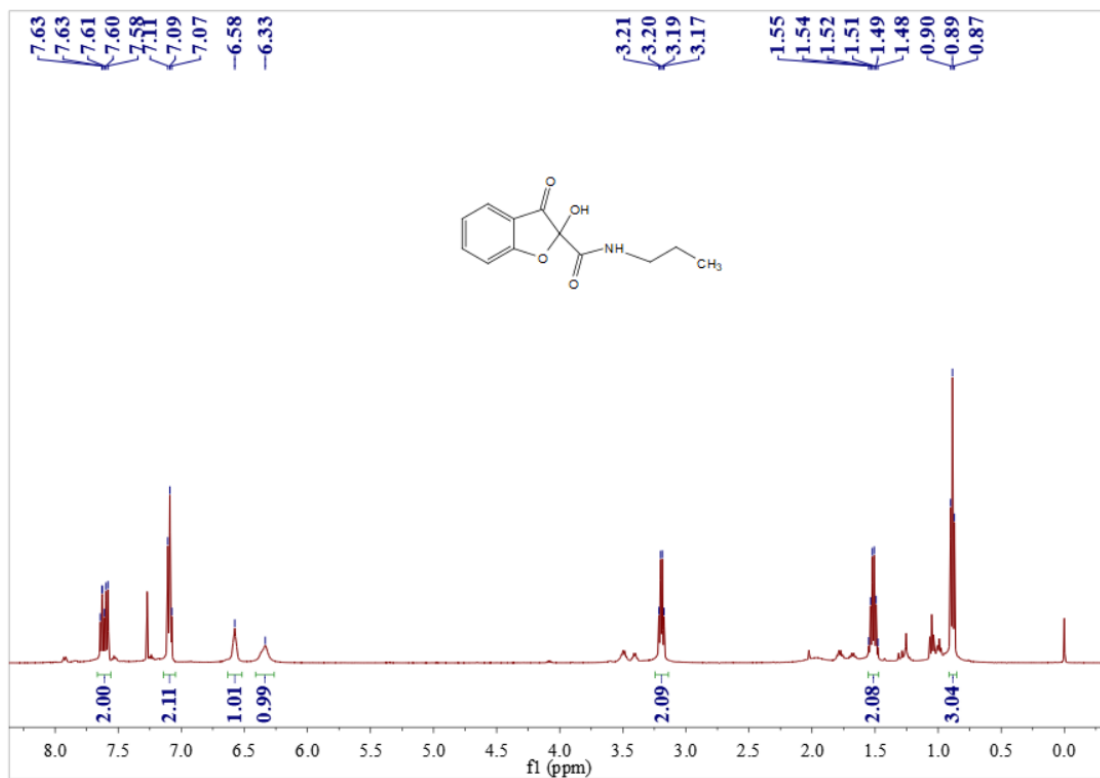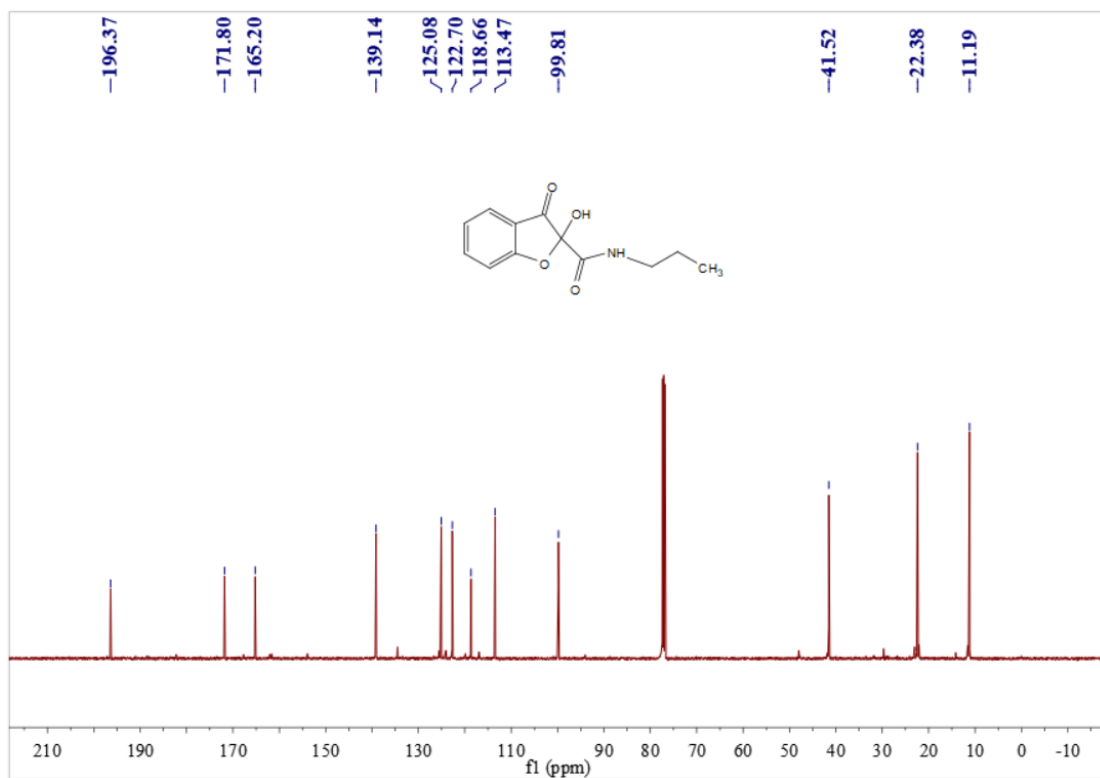

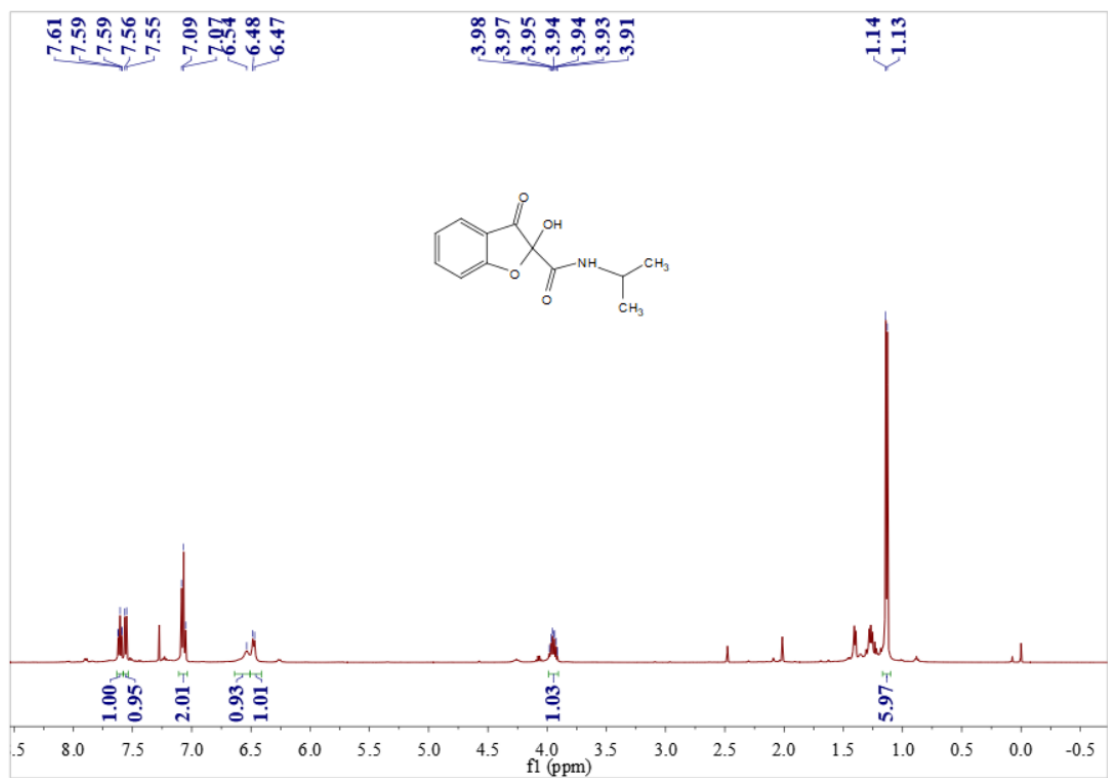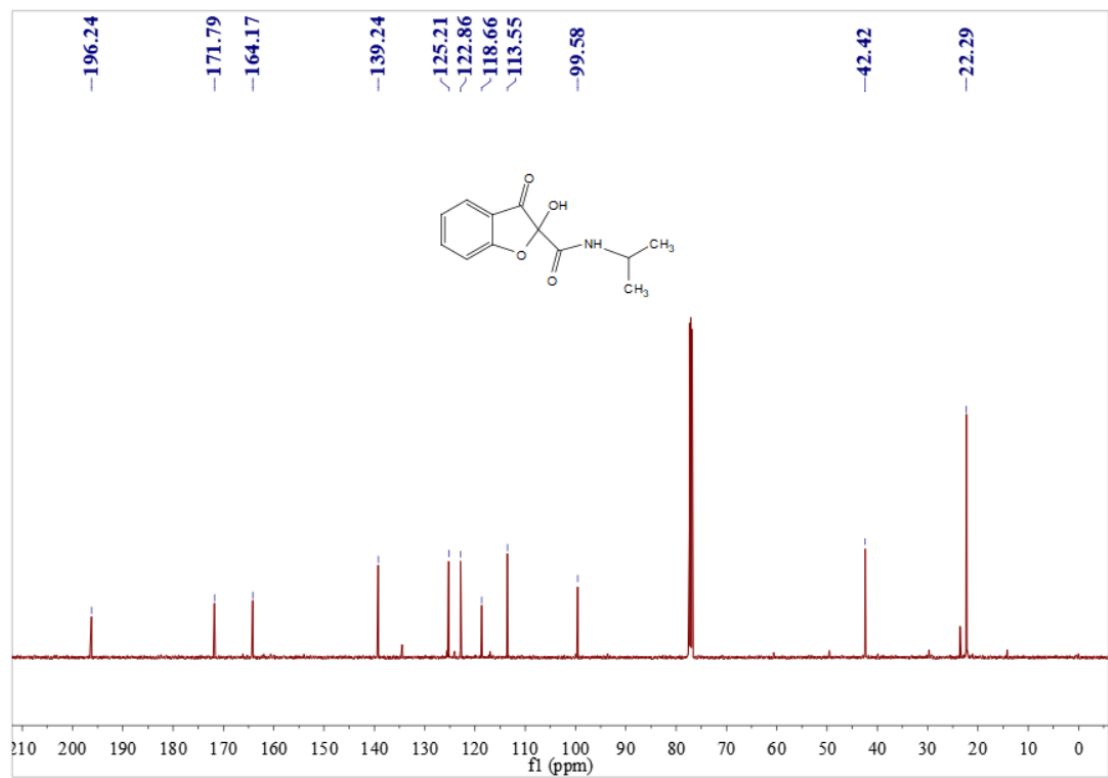



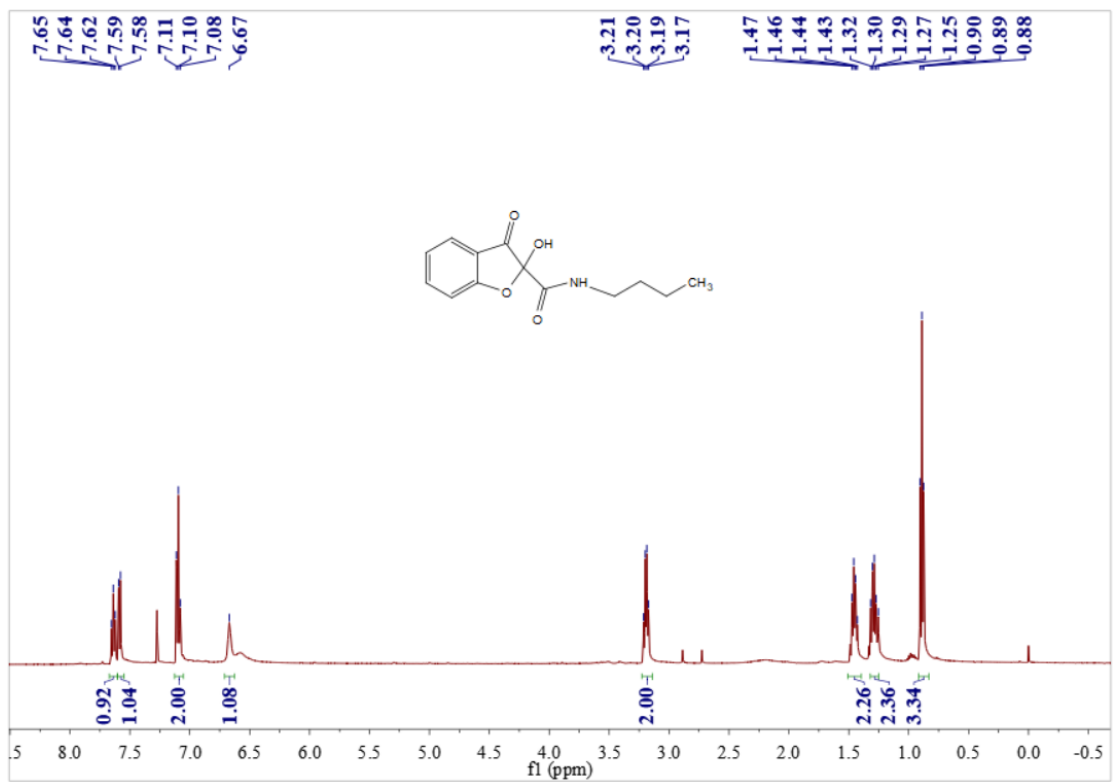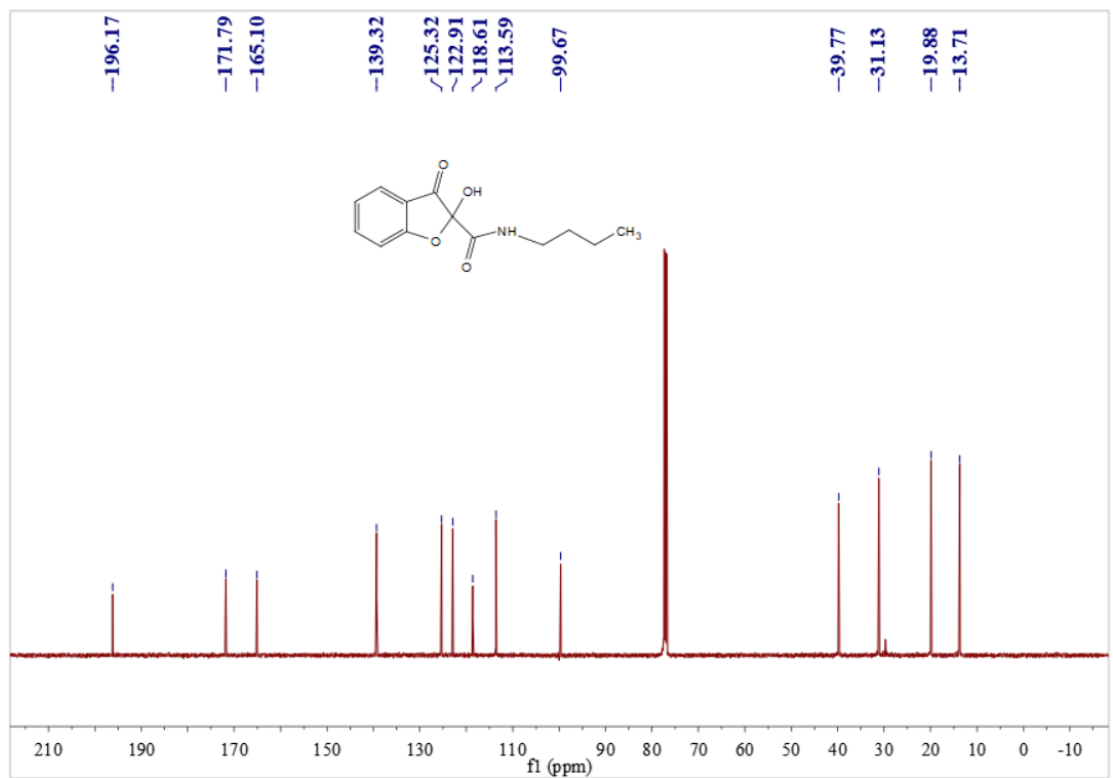

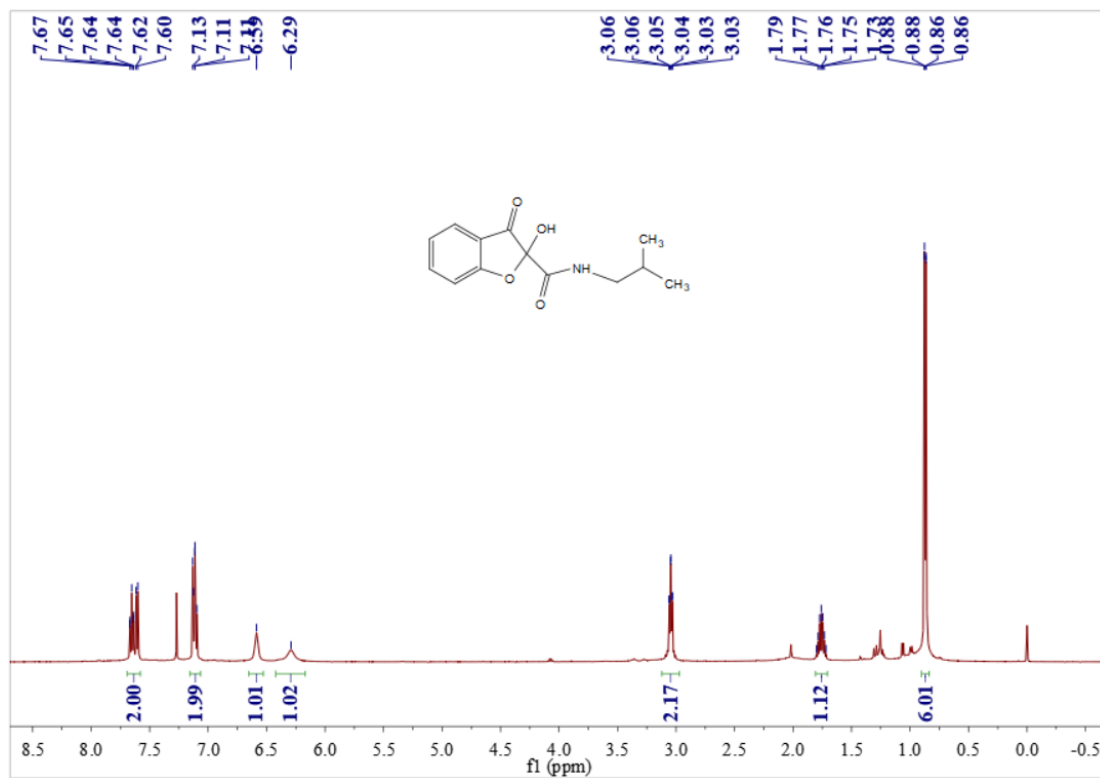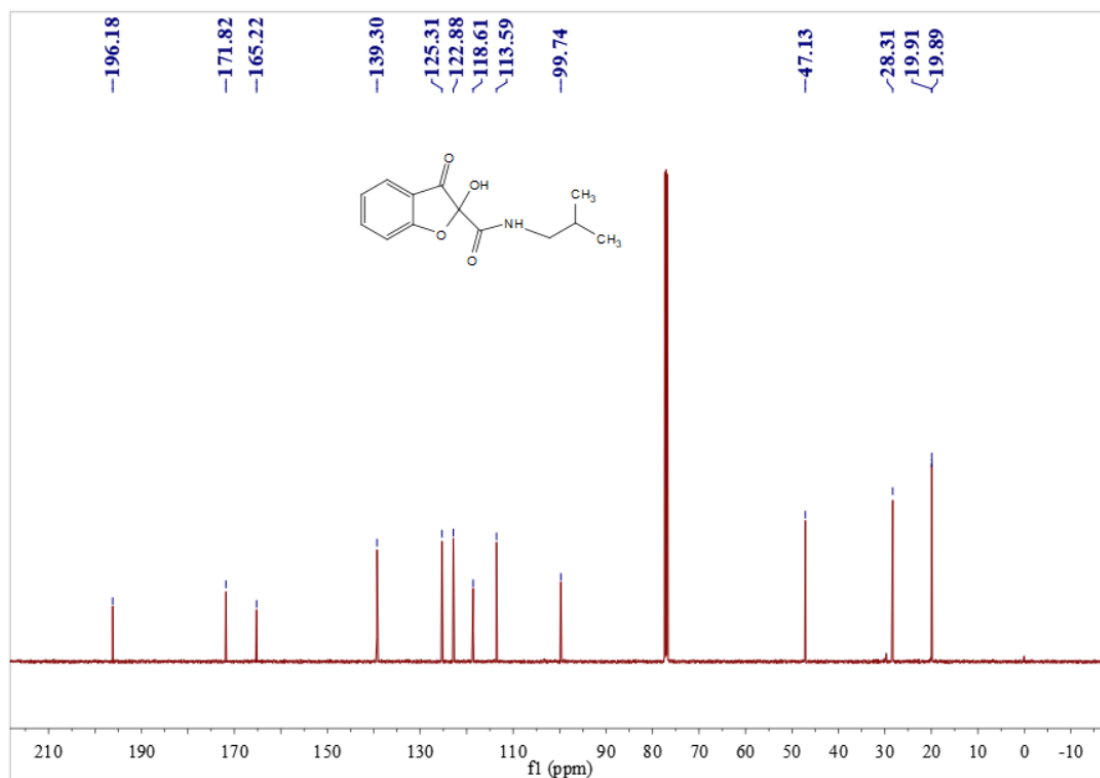

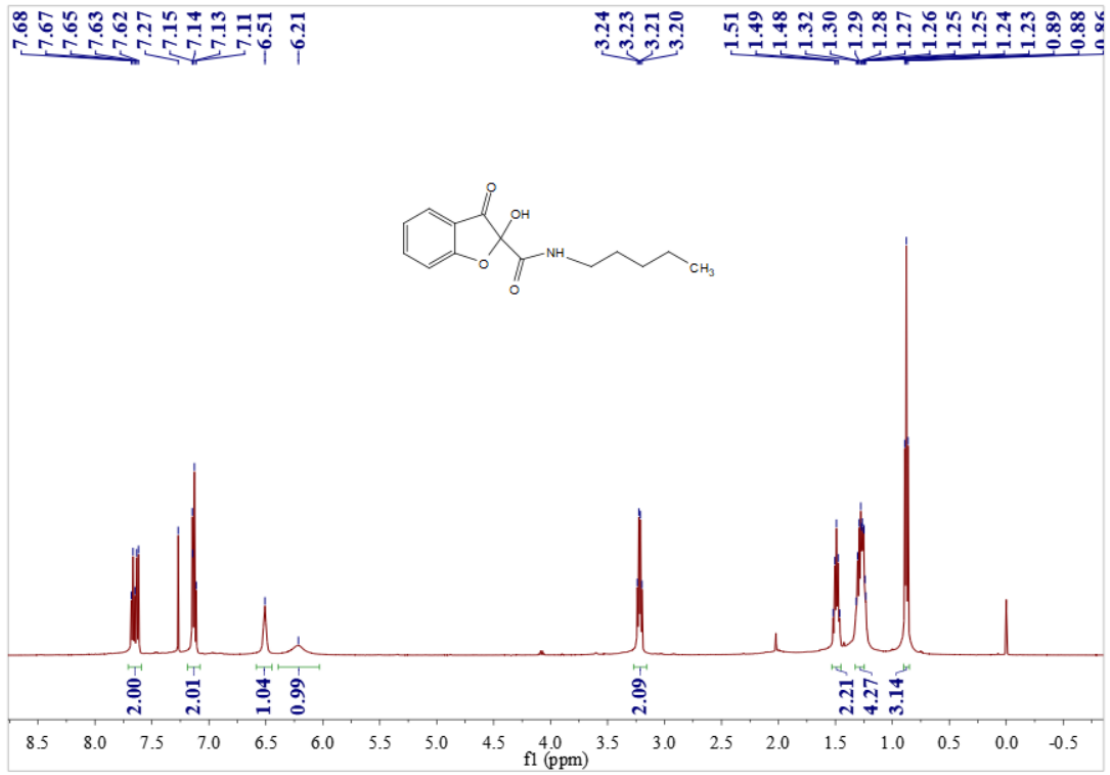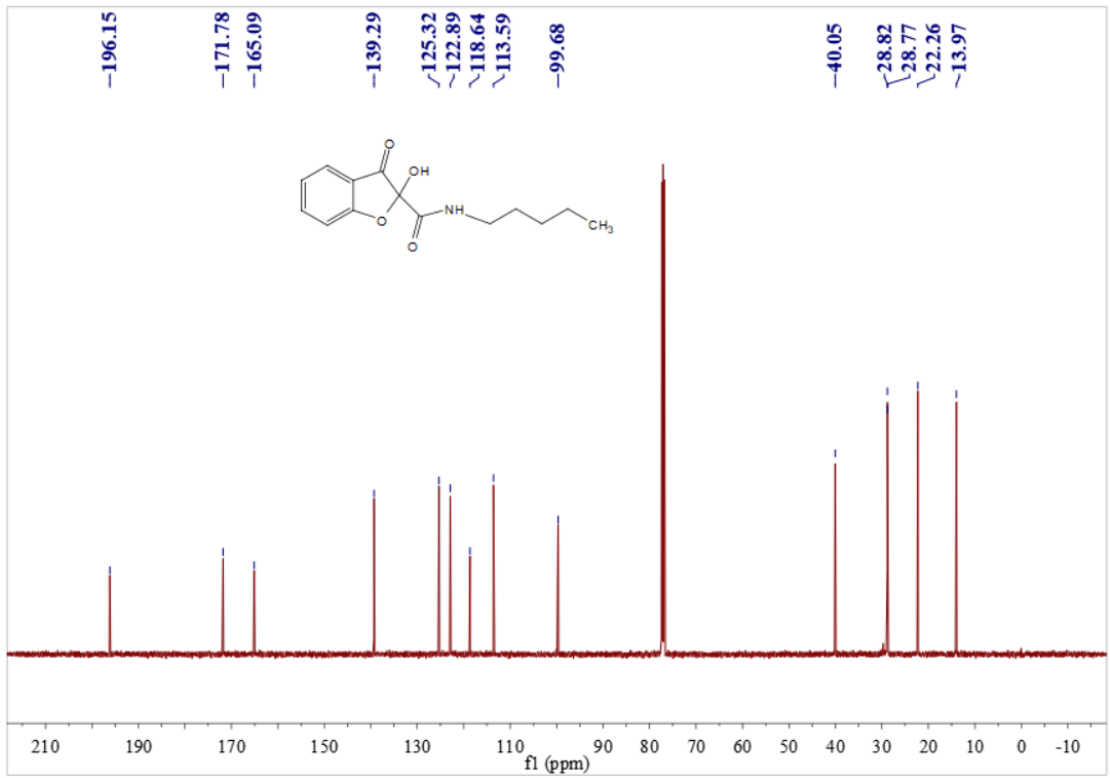

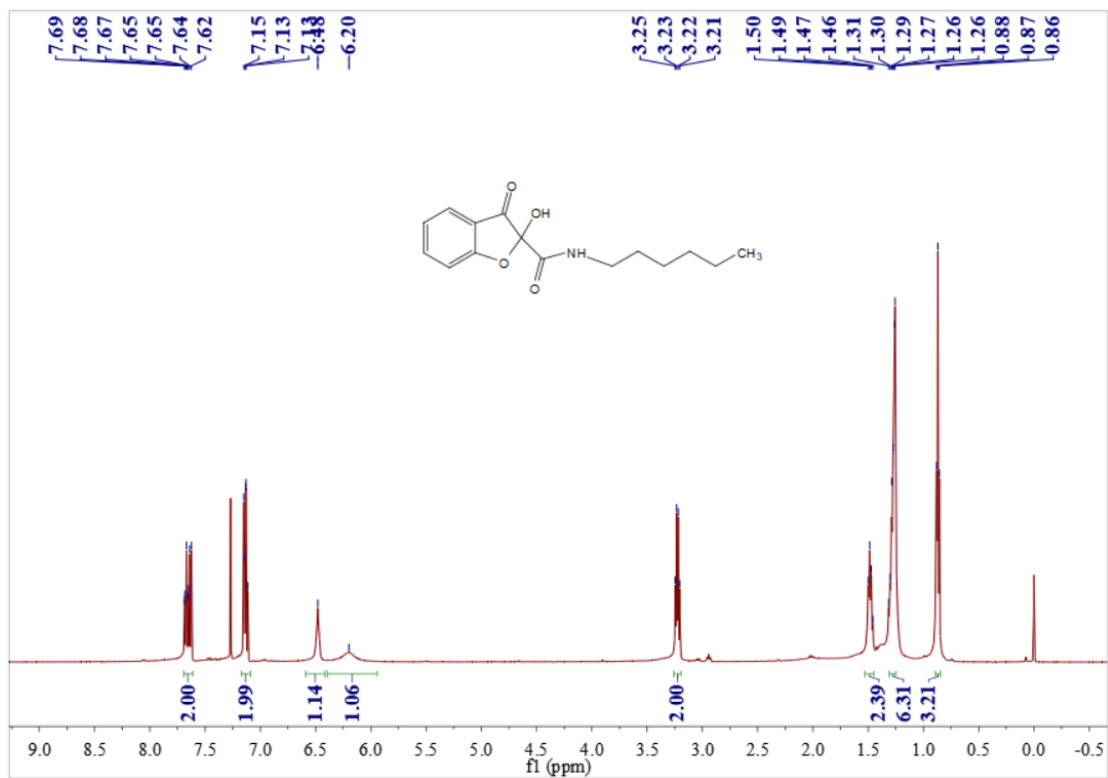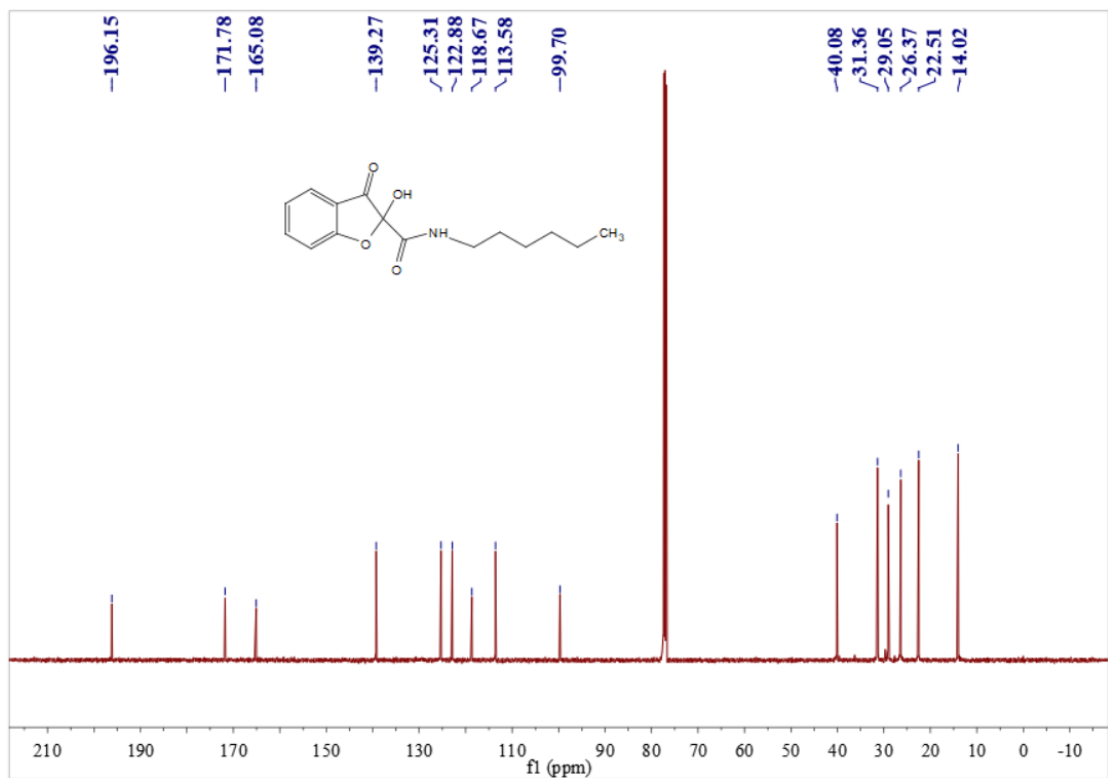

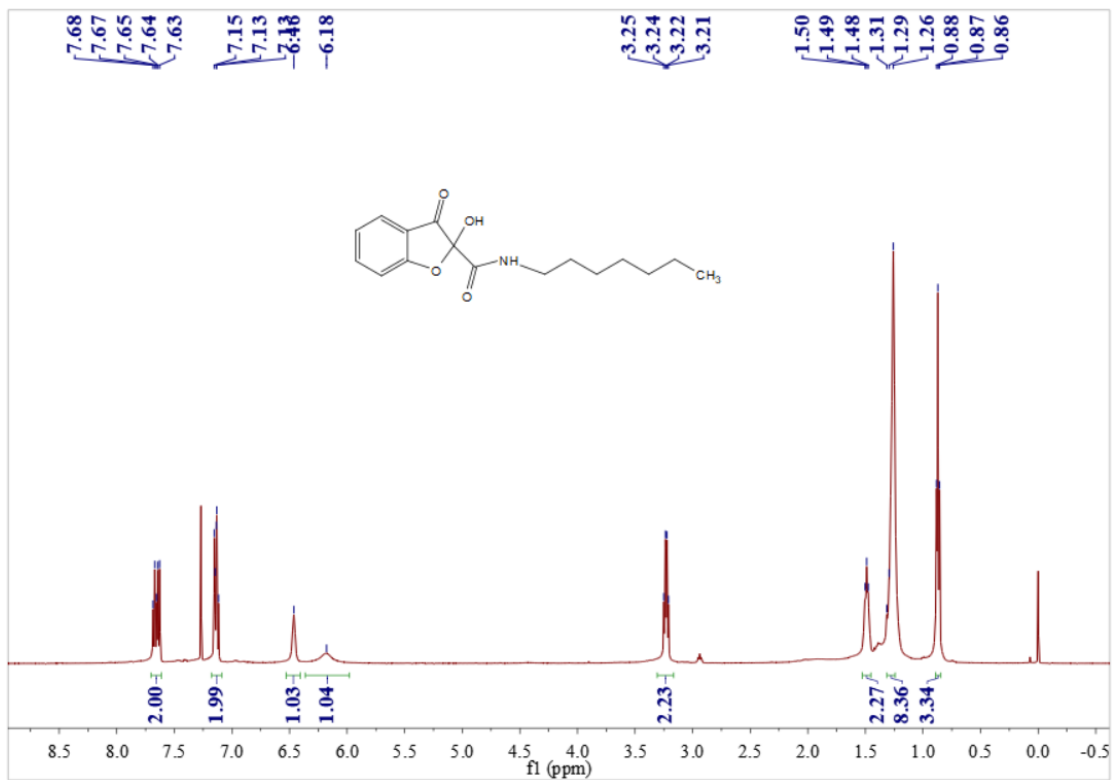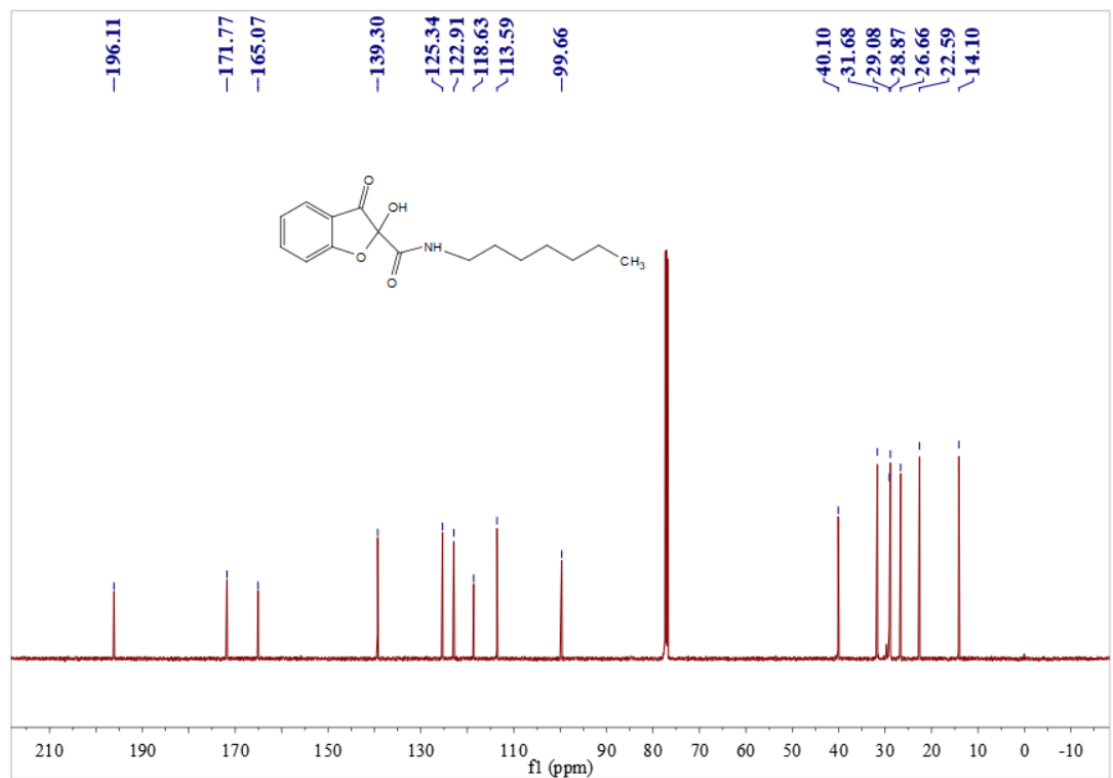

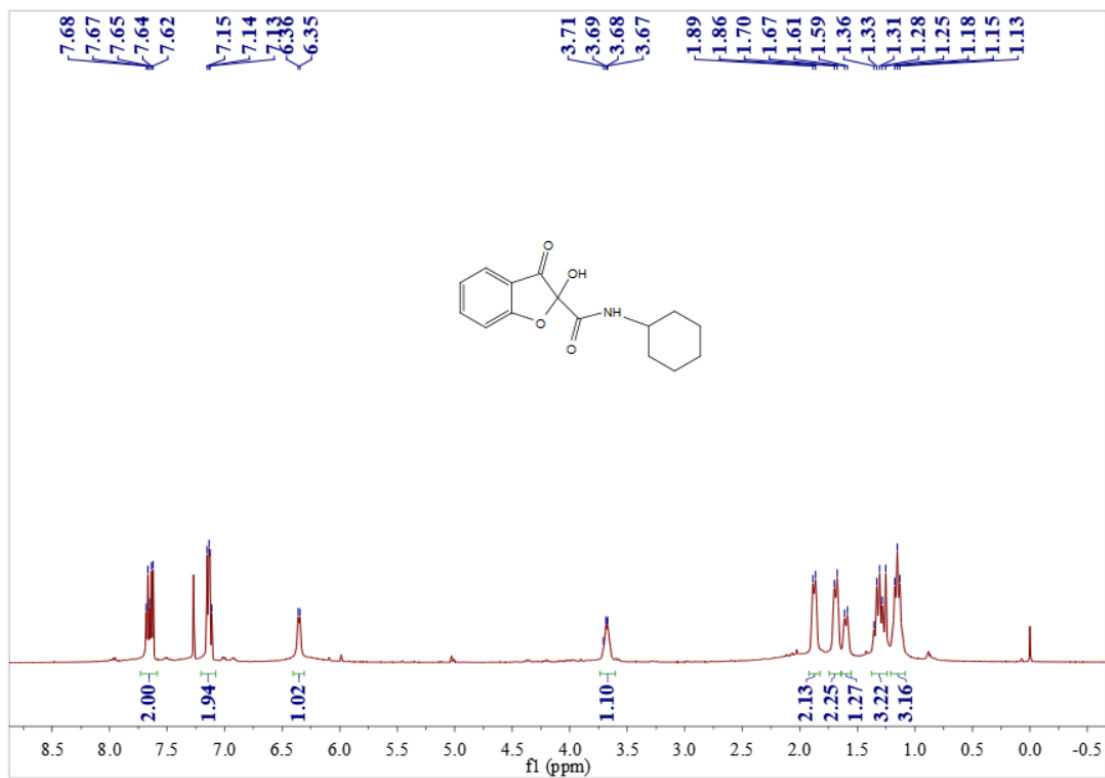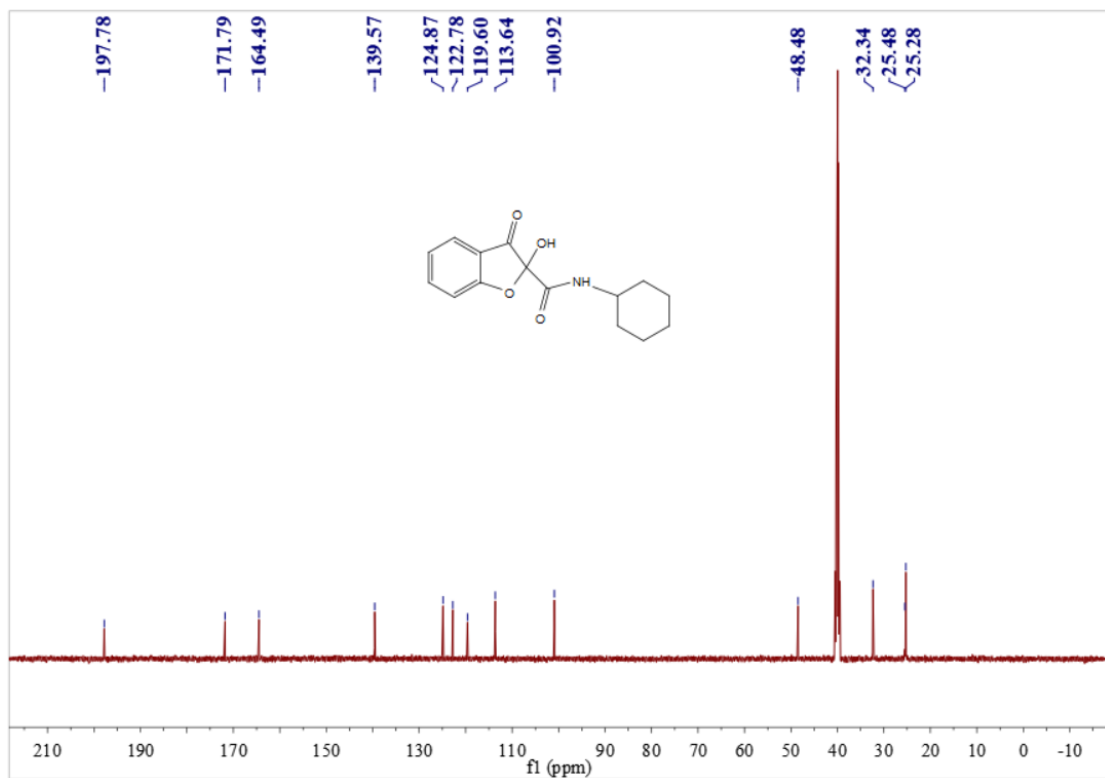

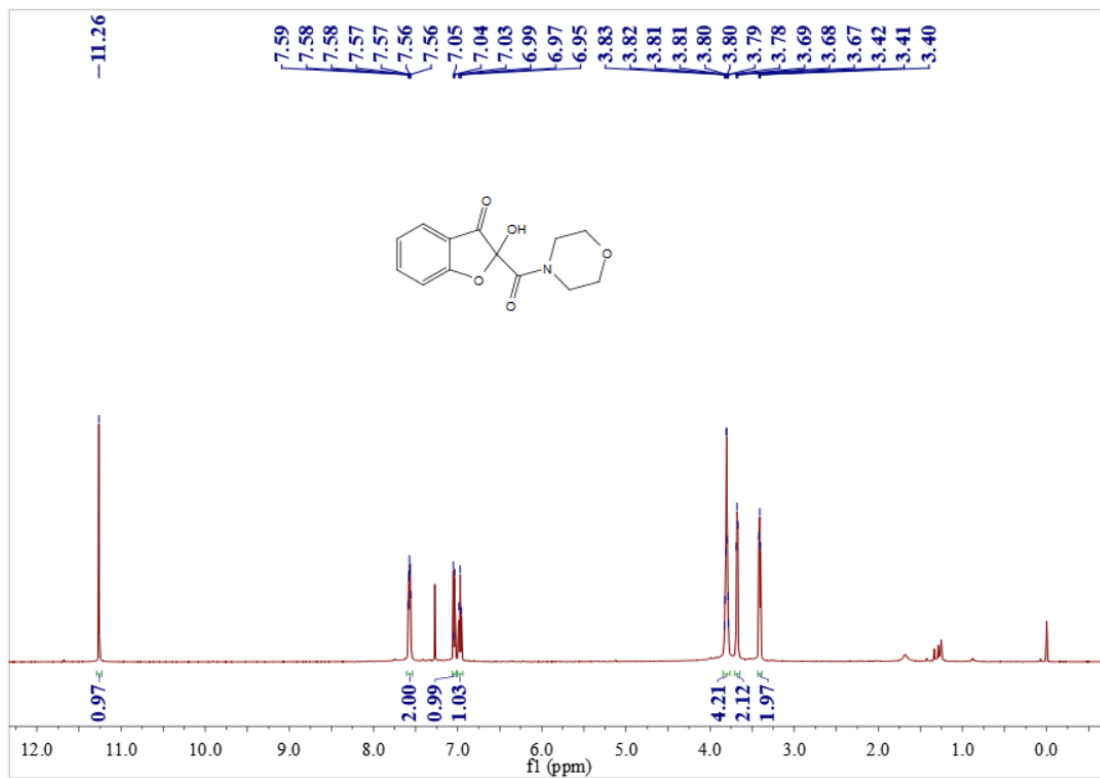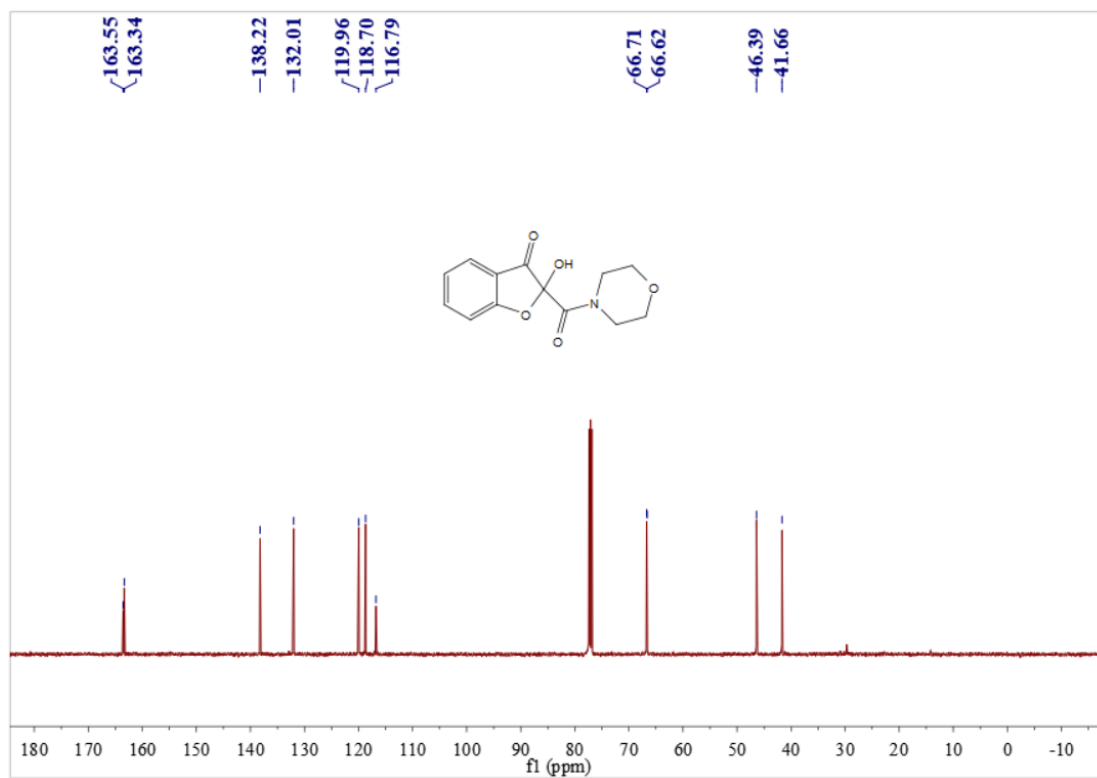

Supplement: d4gc03834g1.pdf [file d4gc03834g1.pdf]
